# Supplementary material for: Trends in the prevalence, incidence and surgical management of carpal tunnel syndrome between 1993 and 2013: an observational analysis of UK primary care records
Source: PubMed Central journal article supplement (PMC6020969; doi:10.1136/bmjopen-2017-020166), 2018-06-19
Supplement: bmjopen-2017-020166.draft_revisions.pdf [file bmjopen-2017-020166.draft_revisions.pdf]

# BMJ Open

BMJ Open is committed to open peer review. As part of this commitment we make the peer review history of every article we publish publicly available.

When an article is published we post the peer reviewers' comments and the authors' responses online. We also post the versions of the paper that were used during peer review. These are the versions that the peer review comments apply to.

The versions of the paper that follow are the versions that were submitted during the peer review process. They are not the versions of record or the final published versions. They should not be cited or distributed as the published version of this manuscript.

BMJ Open is an open access journal and the full, final, typeset and author-corrected version of record of the manuscript is available on our site with no access controls, subscription charges or pay-per-view fees (<http://bmjopen.bmj.com>).

If you have any questions on BMJ Open's open peer review process please email [info.bmjopen@bmj.com](mailto:info.bmjopen@bmj.com)

# BMJ Open

## Trends in the prevalence, incidence and surgical management of carpal tunnel syndrome between 1993 and 2013: an observational analysis of UK primary care records

|                               |                                                                                                                                                                                                                                                                                                                                                                                                                                                                                                                                                              |
|-------------------------------|--------------------------------------------------------------------------------------------------------------------------------------------------------------------------------------------------------------------------------------------------------------------------------------------------------------------------------------------------------------------------------------------------------------------------------------------------------------------------------------------------------------------------------------------------------------|
| Journal:                      | <i>BMJ Open</i>                                                                                                                                                                                                                                                                                                                                                                                                                                                                                                                                              |
| Manuscript ID                 | bmjopen-2017-020166                                                                                                                                                                                                                                                                                                                                                                                                                                                                                                                                          |
| Article Type:                 | Research                                                                                                                                                                                                                                                                                                                                                                                                                                                                                                                                                     |
| Date Submitted by the Author: | 18-Oct-2017                                                                                                                                                                                                                                                                                                                                                                                                                                                                                                                                                  |
| Complete List of Authors:     | Burton, Claire; Keele University, Arthritis Research UK Primary Care Centre, Research Institute for Primary Care & Health Sciences<br>Chen, Ying; Keele University, Arthritis Research UK Primary Care Centre, Research Institute for Primary Care & Health Sciences<br>Chesterton, Linda; Keele University, Arthritis Research UK Primary Care Centre, Research Institute for Primary Care & Health Sciences<br>van der Windt, Danielle; Keele University, Arthritis Research UK Primary Care Centre, Research Institute for Primary Care & Health Sciences |
| Keywords:                     | PRIMARY CARE, SURGERY, Musculoskeletal disorders < ORTHOPAEDIC & TRAUMA SURGERY, Hand & wrist < ORTHOPAEDIC & TRAUMA SURGERY                                                                                                                                                                                                                                                                                                                                                                                                                                 |
|                               |                                                                                                                                                                                                                                                                                                                                                                                                                                                                                                                                                              |

SCHOLARONE™  
Manuscripts

1  
2  
3 **Trends in the prevalence, incidence and surgical management of carpal tunnel**  
4 **syndrome between 1993 and 2013: an observational analysis of UK primary care**  
5 **records**  
6  
7

8  
9 **Authors**  
10

11 Claire L. Burton<sup>a</sup> [c.burton@keele.ac.uk](mailto:c.burton@keele.ac.uk) GP Research Fellow

12 Ying Chen<sup>a</sup> Research<sup>a</sup> Research Associate in Biostatistics

13 Linda S. Chesterton<sup>a</sup> Senior Lecturer in Physiotherapy

14 Danielle A. van der Windt<sup>a</sup> Professor of Primary Care Epidemiology

15  
16 <sup>a</sup> Arthritis Research UK Primary Care Centre, Research Institute for Primary Care & Health  
17 Sciences, Keele University, Staffordshire, England. ST5 5BG

18  
19  
20  
21 Word count (excluding title page, abstract, references, figures and tables) 4266  
22  
23  
24  
25  
26  
27  
28  
29  
30  
31  
32  
33  
34  
35  
36  
37  
38  
39  
40  
41  
42  
43  
44  
45  
46  
47  
48  
49  
50  
51  
52  
53  
54  
55  
56  
57  
58  
59  
60

## Abstract

### Objectives

To describe the prevalence, incidence and surgical management of carpal tunnel syndrome (CTS), between 1993 and 2013, as recorded in the Clinical Practice Research Datalink (CPRD)

### Design

We completed a series of cross-sectional epidemiological analyses to observe trends over time.

### Setting

Primary care data collected between 1993 and 2013, stored in the Clinical Practice Research Datalink

### Population

Individuals  $\geq 18$  years were selected. Prevalent and incident episodes of Carpal Tunnel syndrome (CTS) and episodes surgical intervention were identified using a list of pre-identified Read codes.

### Analysis

We defined incident episodes as those with no preceding diagnostic code for CTS in the past 2 years of data. Episodes of surgery were expressed as a percentage of the prevalent population during the same calendar year. Joinpoint regression was used to determine significant changes in the underlying trend.

### Results

The prevalence of CTS increased over the study period, with a particular incline between 2000 and 2004 (annual percentage change 7.81). The female to male prevalence ratio reduced over time from 2.74 in 1993 to 1.93 in 2013. The median age of females and males with CTS were noted to increase from 49 and 42 years respectively in 1993 to 54 and 48 years respectively in 2013. Incidence was also noted to increase over time. After an initial increase between 1993 and 2007, the percentage of prevalent patients with a coded surgical episode began to decrease after 2007 to 27.41% in 2013 (annual percentage change -1.7)

### Conclusion

This study has demonstrated that the prevalence and incidence of carpal tunnel syndrome increased over the study period between 1993 and 2013. Rates of surgery for CTS also increased over the study period, however after 2007, the percent of patients receiving surgery showed a statistically significant decline back to the rate seen in 2004.

## Key words

Carpal tunnel syndrome; primary care; epidemiology; incidence; prevalence; surgery

1  
2  
3  
4  
5  
6  
7  
8  
9  
10  
11  
12  
13  
14  
15  
16  
17  
18  
19  
20  
21  
22  
23  
24  
25  
26  
27  
28  
29  
30  
31  
32  
33  
34  
35  
36  
37  
38  
39  
40  
41  
42  
43  
44  
45  
46  
47  
48  
49  
50  
51  
52  
53  
54  
55  
56  
57  
58  
59  
60

**Strengths and Limitations**

- Provides updated epidemiological data about a common and bothersome condition
- Set in primary care, where most cases of carpal tunnel syndrome present
- Utilises a large primary care database, generalizable to the UK population
- Relies on the correct coding and capture of episodes of carpal tunnel syndrome and carpal tunnel release surgery

For peer review only

## INTRODUCTION

Carpal tunnel syndrome (CTS) is a chronic focal compressive neuropathy caused by the entrapment of the median nerve at the level of the carpal tunnel in the wrist.[1] CTS is the most common presentation of the entrapment neuropathies [2] and is characterised by symptoms including paraesthesia, dyesthesia, sensory loss and eventually weakness and atrophy of the thenar muscle. Symptoms are usually localised to the hand but can spread proximally to the forearm, upper arm and even shoulder.[3] Despite causing relatively localised symptoms, CTS can have substantial physical, psychological and economic consequences.[4, 5]

The diagnosis of CTS is generally accepted to be a clinical one (based on history and examination findings) [6], although electrodiagnostic tests are commonly requested to confirm the diagnosis or differentiate among diagnoses, especially in the presence of thenar atrophy and / or persistent numbness or if surgical management is being considered.[7] The treatment of CTS is usually defined as either surgical or conservative (non-surgical). Local steroid injections and night splinting form the mainstay of primary care interventions in carpal tunnel syndrome, as indicated by national care pathways.[8, 9] Patients with moderate, severe or deteriorating symptoms following conservative treatment or sudden and severe symptoms should be referred for consideration of surgery.[10] Carpal tunnel release surgery (CTR) is routinely carried out under local anaesthetic as day surgery. Open and endoscopic approaches are used to release the flexor retinaculum. Adjuncts to the release include a tenosynovectomy, neurolysis of the median nerve or lengthening or reconstruction of the flexor retinaculum.[11] Previous studies have sought to estimate the prevalence and / or incidence of CTS. Such epidemiological studies have been diverse in their approach to the populations studied and case definitions applied.[12] The reported estimates for annual prevalence range from 3720-5700 per 100,000 per year [13-15] and the reported incidence from 72 – 8200 per 100,000 per year.[12, 16-22] CTS is generally accepted to be more common in women; the female to male ratio ranges between 0.78 and 9.66 [12, 13] A number of previous studies have observed the trends of prevalence or incidence over time and identified an increase [17, 18, 23], with 2005 being the latest data collection point. The most recent primary care based study in the UK utilised data from between 1992 and 2000.[16]

Episodes of CTR have also been shown to increase, with audit data from one major tertiary UK Hand Centre suggesting that referral for CTR increased over a 10 year period from 59.7 to 112 per 100,000 population per year between 1989-9 and 2000-1.[24] Using Hospital Episode Statistics (HES) between 1998 and 2011, Bebbington and Furniss also observed an increase in the absolute number of patients with CTS and episodes of CTR, however they also noted a decrease in the use of surgery post 2008.[25]

Previous studies have used a range of methods to classify episodes of CTS and have been conducted in a number of population settings. CTS is essentially a clinical diagnosis, and in the UK, the majority of patients will first present to and be managed within primary care. Only a proportion of these patients will be referred into more specialised services and since not all surgical episodes will take place in secondary care (hospitals), as community clinics are now receiving referrals, primary care records should capture the majority of episodes. Data from a high quality source, representative of the UK population is necessary to support the planning and commissioning of services.

The aim of this study is therefore to provide updated estimates of the prevalence, incidence and surgical management of carpal tunnel syndrome and describe trends over a 20 year

1  
2  
3 period, using data from a large national primary care database (Clinical Practice Research  
4 Datalink (CPRD)).  
5  
6

## 7 **METHODS**

8  
9 This was an observational study using the Clinical Practice Research Datalink (CPRD) to  
10 estimate the prevalence, incidence and surgical management of CTS from 1993 to 2013.  
11 CPRD is a live, primary care database of anonymised medical records from general  
12 practices. It holds information of over 11.3 million patients from 674 practices in the UK since  
13 1987. 4.4 million active (alive and currently registered) patients are currently contributing  
14 information to the datalink, which equates to 6.9% of the UK population. [26] CPRD is  
15 broadly representative of the UK general population in terms of age, gender and ethnicity.  
16 [26] The CPRD has National Research Ethics Committee (NRES) approval for observational  
17 research using primary care data and as such no further permissions were required. The  
18 Independent Scientific Advisory Committee (ISAC) study protocol 14\_167 was approved in  
19 September 2014. Patients were not directly involved in the design of this study, however the  
20 results will be used to inform discussions regarding further research in this field with our local  
21 Research User Group.

22 During clinical interactions, Read Codes are used to record signs and symptoms, treatments  
23 and therapies, investigations, occupations, diagnoses and appliances. Read Codes make up  
24 a hierarchical 'thesaurus' stored by the computer. Clinical information is hence stored in a  
25 retrievable and analysable format.[27]  
26

27 The study population consisted of men and women over 18 years of age. Patients were  
28 required to have up to standard (practice level) research quality (patient level) data in CPRD,  
29 for two years prior to an incident episode and at the point of diagnosis for a prevalent  
30 episode. The 'up to standard' metric (defined by CPRD) is based on continuity of recording  
31 and the recording of deaths, and set at the latest date at which practices met the quality  
32 criteria. The acceptable patient metric is based on registration status, the patient record itself  
33 and valid age and gender.[26]

34 Prevalent and incident patients were identified by a consultation recorded using one of the  
35 Read codes listed in Table 1. Some treatment codes and in the case of injections, linked  
36 prescription data, were included as evidence of diagnosis as per previous studies.[16] Pilot  
37 work using a local primary care database (Consultations in Primary Care Archive, CiPCA  
38 [28]) had noted that 30% of CTS cases with a treatment code (i.e. CTR or a coded carpal  
39 tunnel injection) had not initially received a diagnosis code. This means that at presentation,  
40 patients may have been attributed a more generic term such as 'hand pain' and later gone  
41 on to receive condition specific treatment. Hence, treatment codes were used to capture  
42 such cases, which would be missed when using diagnostic codes only.  
43

44 Table 1 Readcodes used to define a prevalent or incident episode of carpal tunnel syndrome  
45  
46

47 The prevalence of individuals consulting with CTS was calculated per annum. The  
48 numerator for prevalence was the number of patients with a record of a CTS diagnosis or  
49 evidence of an episode of CTR or a carpal tunnel injection (CTI), in each calendar year. In  
50 order to determine annual incidence, the numerator was the number of patients with a record  
51 of CTS or evidence of CTR or CTI, without a prior record of these codes during a run-in-  
52 period of two years. This two year run-in period was based on expert consensus with the aim  
53 of estimating the period of time during which a new episode of CTS may develop. It was felt  
54 unlikely that a patient with ongoing bothersome symptoms would not have presented in  
55 primary care within this 2 year period. CTS could present as a new episode in the  
56 contralateral wrist sometime after the initial presentation, hence it was not felt possible to  
57  
58  
59  
60

define this criterion as 'no previous recorded episode'. All incidence patients were therefore required to have complete registration for the 2 calendar years prior to the event date. Pilot work in CiPCA had shown that over 9 years observed, 4% of potential incident cases were lost due to the lack of 2 years registration data required to define an incident episode.

The denominator population for calculation of prevalence was the total up-to-standard person-years contributed to CPRD by patients over the age of 18 years, for each annual period between 1993 and 2013. In order to apply the same criteria to both the numerator and denominator populations, the denominator populations for calculating incidence were also required to have registration at the mid-point of the year, two calendar years before the index year.

Episodes of carpal tunnel release (CTR) were identified using Read codes as shown in Table 2. In addition, codes used to define 're-release of carpal tunnel' and 'revision of carpal tunnel release' were included as a surgical episode (if first recorded). These terms were not included in the definition of CTS for the estimation of prevalence and incidence as they may not have indicated an episode of 'idiopathic' CTS but rather iatrogenic symptoms following previous (unsuccessful) surgery. Of note revision codes contributed 1.00% of the total surgical codes used. Results were expressed as the percentage of patients with a prevalent episode of CTS having a code of CTR in the same calendar year. Percentages were calculated based on the number of prevalent cases as opposed to incident cases as it was felt likely that patients would receive surgery in the annual period following their index consultation.

Table 2 Read codes used to define a surgical episode

### Statistical methods

Age and sex specific annual prevalence and incidence were determined for each calendar year, between 1993 and 2013 and presented as n / 10,000 person years. For confidence interval calculation a Poisson distribution was used. As a sensitivity analysis, age and sex standardised annual figures of CTS prevalence and incidence for each year were also calculated, using population estimates provided by the website of the Office of National Statistics.[29] Un-standardised and standardised rates were very similar, hence we report un-standardised rates as the primary outcome.

Episodes of CTR were identified and the frequency in each calendar year expressed as a percentage of the prevalent population for the same time period. Emerging trends were described. Joinpoint regression was used to determine mean Annual Percentage Change (APC) and assess when significant changes ('joinpoints') occurred in the underlying trend. This method assists the exploration of the potential influence of changes in practice, although such potential associations cannot be proven.[30, 31] Models were fitted using the JOINPOINT REGRESSION PROGRAM (version 4.3.1.0) and the best fitting model chosen (up to 5 joinpoints).

## RESULTS

### Trends in prevalence

Table 3 presents the prevalence (crude estimates) of patients presenting in primary care with carpal tunnel syndrome between 1993 and 2013 and the demographics of the population. The denominator population for prevalence increased from 1,117,433 person years in 1993 to 3,473,094 person years in 2013. The total prevalence in 1993 was 26.03 per 10,000 person years (95% CI 25.10 – 27.00), and for 2013, 36.08 per 10,000 person years (95% CI 35.45 – 36.72). As shown in Figure 1, prevalence appeared to decrease



1  
2  
3 between 1993 and 2000 (annual percentage change APC = -0.84%, 95% confidence interval  
4 -2.6 to 1.0). It then increased between 2000 and 2004 (APC = 7.81%, 95% CI 3.1 – 12.7)  
5 and then increased at a slower rate between 2004 and 2013 (APC = 1.08%, 95% CI 0.4 –  
6 1.8). The female to male ratio reduced over time from 2.74 in 1993 to 1.93 in 2013. The  
7 median age of female and male patients with CTS increased from 49 and 42 years  
8 respectively in 1993 to 54 and 48 years respectively in 2013 (see Supplementary Table 1).  
9

10 Table 3 Crude prevalence of carpal tunnel syndrome (n/10,000 person years) per calendar  
11 year, as presented in UK primary care (CPRD)  
12  
13

#### 14 **Trends in incidence**

15  
16 Table 5 presents the annual incidence (crude estimates) for patients presenting in UK  
17 primary care with carpal tunnel syndrome between 1993 and 2013 and the demographics of  
18 the population. The denominator population for incidence, which is dependent on patients  
19 having 2 years up to standard data prior to the midpoint of the year in question, increased  
20 from 783,330 person years in 1993 to 3,015,670 person years in 2013. The crude incidence  
21 in 1993 was 20.22 per 10,000 person years (95% CI 19.24 - 21.24)), and for 2013, 27.09 per  
22 10,000 person years (95% CI 28.28 – 35.95). As shown in Figure 2, the results of the best  
23 fitting Joinpoint regression suggest the incidence increased between 1993 and 2000 (APC =  
24 0.3, 95% CI -2.3 – 2.9). It then increased more quickly between 2000 and 2004 (APC = 6.9,  
25 95% CI 0.5 – 13.7), before slowing between 2004 and 2013 (APC = 0.7, 95% CI -0.2 – 1.6).  
26 The female to male ratio reduced over time from 2.57 in 1993 to 1.88 in 2013. The median  
27 age of female and male patients were noted to increase from 50 and 55 years respectively in  
28 1993 to 51 and 59 years respectively in 2013 (see Supplementary Table 2). The age and  
29 sex standardised estimates of the annual prevalence and incidence of CTS are shown in  
30 Supplementary Table 3.  
31

32 Table 4 Crude incidence of carpal tunnel syndrome (n/10,000 person years) per calendar  
33

34 Figure 1 Joinpoint analysis of the crude prevalence of carpal tunnel syndrome between 1993 and 2013  
35

36 year, as presented in UK primary care (CPRD)  
37

38  
39 Figure 2 Joinpoint analysis of crude incidence  
40

#### 41 **Trends in the percentage of patients with carpal tunnel syndrome referred and 42 receiving surgical management**

43 Table 5 presents the percentage of prevalent patients with a recorded episode of CTR in  
44 each calendar year between 1993 and 2013 and the demographics of this sample. The  
45 percentage of all patients with a recorded episode of CTR in 1993 was 19.35%, and for  
46 2013, 27.41%. As shown in Figure 3 the percentage of patients with a coded episode of CTR  
47 increased between 1993 - 2007 (annual percentage change APC = 2.6, 95% CI 1.9 – 3.2). It  
48 then appeared to decrease between 2007 and 2013 (APC = -1.7, 95% CI -3.3 - -0.3). The  
49 median age of females and males receiving CTR were noted to increase from 53 and 55  
50 years respectively in 1993 to 57 and 62 years respectively in 2013.  
51  
52  
53

54 Table 5 Percentage of patients with carpal tunnel syndrome with a recorded episode of  
55 carpal tunnel release surgery per calendar year, as presented in UK primary care (CPRD)  
56  
57  
58  
59

1  
2  
3  
4  
5  
6  
7  
8  
9  
10  
11  
12  
13  
14  
15  
16  
17  
18  
19  
20  
21  
22  
23  
24  
25  
26  
27  
28  
29  
30  
31  
32  
33  
34  
35  
36  
37  
38  
39  
40  
41  
42  
43  
44  
45  
46  
47  
48  
49  
50  
51  
52  
53  
54  
55  
56  
57  
58  
59  
60

Figure 3 Joinpoint analysis of percentage of prevalent patients having carpal tunnel surgery

## DISCUSSION

Whilst the prevalence and incidence of CTS have increased over the study period 1993-2013, results show that episodes of surgery, increased until 2007 and declined thereafter.

Supplementary Tables 4 and 5 summarise estimates of the prevalence, incidence and sex ratios of CTS from previous research, demonstrating the substantial variation in results between studies, which may partly be the results of differences in definition of CTS applied and population observed. Studies which also utilised primary care data showed a similar estimate of the incidence of CTS in a UK primary care population [16] and similarly reported an increase in incidence over time, albeit in a Dutch primary care population.[19]

The variability in the case definition of carpal tunnel syndrome was highlighted by Descatha et al 2011 who identified seven case definitions of CTS proposed for use in population based studies. Definitions included variations of: symptoms only; symptoms and examination findings; symptoms and either physical examination or electrodiagnostic results and symptoms and electrodiagnostic results. This study showed a range in the population prevalence of CTS from 2.5% to 11%, with studies using less specific case definitions yielding higher prevalence rates.[32] Misclassification ranged between 1 and 10%. The prevalence of CTS in any given population is likely therefore to depend on the definition of CTS applied. The case definition in our study is derived from GP recorded diagnosis and treatment codes, which may have been based on clinical findings alone; those who have had further investigations and those who have received definitive condition specific treatment. Hence it utilises a pragmatic approach, across a large population that will include all patients presenting to their GP with symptoms. Our study methods do however assume that patients with symptoms will be presenting in primary care or be receiving definitive coded treatment. The study will not capture patients with chronic symptoms who are not presenting in primary care or who had a coded episode of surgery or injection.

Although Joinpoint analysis does not provide evidence for the cause of a change in observed outcomes, it highlights when a significant change in trend has taken place. Our results suggest that the annual percentage change in prevalence and incidence was highest between 2000 and 2004. A possible reason for this may be the publication of the UK Government's information technology strategy for the NHS in 1998,[33] which proposed that by 2005, the person-based electronic health record (HER), would have been fully implemented.[34] Although no direct evidence for this was found, it may be possible that with the increasing use of IT systems in primary care and attention to providing Read codes for each consultation, episodes of CTS were more frequently and accurately recorded. This would not however explain the continuing increase of the incidence in CTS post 2005.

Between 2000 and 2004, the Government implemented the second phase of its 'War on Waiting,' i.e. the reduction of waiting times. For example, the maximum wait for a day-case procedure (e.g. a CTR) was reduced from 18 months to 6 months. [35] The peak in prevalence of CTS (with our definition partly based also on treatment codes, which in 2013 constituted 29.36% of prevalent patients) observed in 2004 may therefore be partly explained by the fact that patients requiring surgery were 'accumulating' between 2000 and 2004 and subsequently received definitive treatment. This effect would however not be expected to impact so heavily upon the incidence, which disregards repeat patient presentations in subsequent annual periods, unless patients with a less specific code received treatment and appeared as an incident case. The introduction of the 18 week target

1  
2  
3 of time from referral to treatment in 2008 did not seem to have a similar impact on estimates  
4 of prevalence or incidence of CTS, which makes it less certain to what extent these policy  
5 changes may have influenced our results. There are likely to be further reasons behind the  
6 observed changes.

7  
8 The change in trends of 2004 may also represent a change in service. The introduction of  
9 the Quality and Outcome Framework (QOF) occurred with the advent of the General Medical  
10 Services (GMS) contract in 2004. Although there has never been a musculoskeletal health  
11 domain, the importance of coding to maintain registers and evidence of outcomes in line with  
12 QOF may have influenced coding behaviour.

13  
14 At the same time as QOF, Primary Care Trusts (PCT's) were given a role in commissioning  
15 services. The ability of PCT's to commission new services heralded the development of the  
16 Musculoskeletal Interface Clinics (MIC), which act as a 'one stop shop' for patients with  
17 musculoskeletal problems. A referral to this clinic from primary care may also be a reason  
18 prevalent patients with persisting symptoms stopped presenting in primary care.

19  
20 These three factors (improved coding, service redevelopment and a reduction in waiting  
21 times) may all partly explain the change in incidence and prevalence of CTS between 2000  
22 and 2004 but are unlikely to fully explain the observed trends. Further factors of potential  
23 influence may include the increasing rates of risk factors of CTS such as diabetes and  
24 obesity.[36, 37]

25  
26 The joinpoint analysis suggested an increase in surgical management of CTS between 1989  
27 and 2007 (APC = 2.74), followed by a reducing trend between 2007 (95% CI 2004-2009)  
28 and the end of the study in 2013 (APC = -1.83).

29  
30 Previous studies have described the epidemiology and the rates of CTR in the UK. This  
31 study provides updated data observing the presenting primary care population. Using data  
32 from the General Practice Research Database (GPRD) (forerunner to CPRD) Latinovic et al  
33 reported that 31% of patients with CTS had surgery in 2000 [16], which is similar to the  
34 25.5% found in our study at the same time point. The small difference between the estimates  
35 may be the result of a difference in the calculation used to derive the denominator  
36 population. Audit data from one tertiary hand centre, Wild et al also showed that the rate of  
37 referrals for CTR surgery had increased over the 10 years between 1989-9 and 2000-1.[24]  
38 Furthermore, Bebbington and Furniss observed demographic population shifts in hand  
39 conditions including CTS within Hospital Episode Statistics, which record diagnoses and  
40 procedures performed within NHS Hospitals in England. They used linear regression to  
41 predict future trends in hand surgery, showing that whilst absolute numbers of CTS  
42 diagnoses and CTR procedures increased between 1998 and 2011, the pre-2008 increase  
43 in CTR was significantly steeper than the post-2008 slope ( $p < 0.001$ ).[25] This is suggestive  
44 of a decrease in the surgical management of CTS in terms of the proportion of patients with  
45 CTS having an operation, but not necessarily in the numbers of surgical episodes in  
46 absolute terms, which Bebbington and Furniss predict will have increased by 99% (95% CI  
47 65 – 132) in 2030 compared to 2011.[25] The data from CPRD however, suggested a  
48 reduction in both real term episodes of CTR as well as the proportion of the (increasing)  
49 prevalent population receiving surgical treatment.

50  
51 We may speculate regarding potential reasons for the initial increase in surgical  
52 management of CTS, for example, increased access to specialist services (e.g. community  
53 based Musculoskeletal Interface Clinics); increased litigation leading to more definitive  
54 treatments being sought, and increased patient expectations and demand, but we have no  
55 evidence for such explanations.  
56  
57

1  
2  
3 The decreasing trend in the use of the use of CTR post 2007 is likely to be multifactorial,  
4 however the changing structure of the NHS and its funding streams may have influenced the  
5 observed trend. Around 2007 – 2008, practice-based commissioning (PBC) was being  
6 introduced. This gave primary care notional budgets with which to purchase care for their  
7 patients with the aim of aligning clinical and financial responsibility. Restricting access to  
8 certain procedures including CTR, by implementing pre-specified criteria, was one way to  
9 help achieve this, which may have resulted in a reduction in the use of CTR.

10  
11 There are a number of limitations associated with the data in this study. The accuracy of  
12 consultation data is dependent on the validity of the computerised information it uses. In a  
13 review of 212 publications which aimed to validate diagnoses recorded in GPRD data,  
14 Herrett et reported that the median proportion of cases with a confirmed diagnosis was 89%  
15 (range 24 – 100%), but the majority of publications did not present the sensitivity of a coded  
16 diagnosis, which means that information regarding the proportion of missed cases is lacking.  
17 Potential misclassification; non-attendance in primary care; variation in between GP coding  
18 and a lack of coding may all lead to an unmeasured shortfall in observed cases.[26, 38]. This  
19 study relies on the diagnosis of CTS to be correct and the subsequent coding to be precise.  
20 Whilst CTS diagnoses have not been validated, in a study comparing musculoskeletal  
21 diagnoses in four different databases, Jordan et al suggested that musculoskeletal coding in  
22 GPRD was less reliable than in its other healthcare datasets including CiPCA.[39] We took  
23 measures to reduce the effect of miscoding (e.g. including surgery and injection codes in  
24 prevalence measures, if diagnostic codes had not been used), but it is possible that results  
25 will not be entirely representative of the true prevalence and incidence of CTS.

26  
27 Given the lack of clarity in the accuracy of coding and the likelihood that associated clinical  
28 encounters following a CTR were coded using a surgical code, only the first surgical code  
29 could reliably be used to indicate an episode of surgery. This is likely to have led to an  
30 underestimation of surgical episodes being identified as episodes on the contralateral hand  
31 will have been automatically discounted as they were undistinguishable. Furthermore,  
32 prevalence and incidence were similarly likely to have been underestimated as repeat  
33 presentations for the ipsilateral hand are indistinguishable from presentations in the  
34 contralateral hand.

35  
36 Whilst CPRD provides a large generalizable sample, which has substantial benefits when  
37 estimating epidemiological trends, it cannot directly measure patient reported outcomes.  
38 Furthermore, surgery can be seen as a 'gold standard' treatment, but it does not necessarily  
39 signify cure. A review of the surgical treatment of CTS reported that 70% - 90% of patients  
40 undergoing a CTR have a good outcome (definitions varied).[40] In a retrospective cohort  
41 study over a mean follow up of 13 years post-surgery, 88% of patients were either  
42 completely satisfied or very satisfied with surgery. 74% reported their symptoms had  
43 completely resolved. 1.8% (113 patients) had undergone repeat surgery. [41] There is little  
44 evidence however that CTR is an appropriate initial management option for patients  
45 presenting to primary care with mild to moderate symptoms, especially in the absence of  
46 high quality trial evidence that conservative management is ineffective.[42, 43]

47  
48 Future research in this field could describe the characteristics of patients presenting with  
49 CTS in greater detail, and observe course and prognosis of CTS in primary care. It may then  
50 be possible to identify predictors of the outcome of primary care management, and  
51 potentially identify patients requiring surgery.

## 52 53 54 **CONCLUSION**

1  
2  
3 An increase in the incidence and prevalence of CTS is likely to lead to an increased demand  
4 on services and cost to the healthcare economy.[25] This study has demonstrated an  
5 increase in the prevalence and incidence of carpal tunnel syndrome over the study period  
6 between 1993 and 2013. Rates of referral for CTS and surgical intervention have also  
7 increased over the study period, however in the later years of the study, the percent of  
8 patients receiving surgery has begun to decline.  
9

### 10 **Acknowledgments**

11 The authors wish to thank Dr Dahai Yu for his assistance with the data download.  
12

### 13 **Declaration of competing interests and funding statement**

14 All authors have completed the ICMJE uniform disclosure form  
15 at [www.icmje.org/coi\\_disclosure.pdf](http://www.icmje.org/coi_disclosure.pdf) and declare:  
16

17 "CB is funded by the National Institute of Health Research School for Primary Care (NIHR  
18 SPCR) GP Career Progression Fellowship. The views expressed are those of the authors  
19 and not necessarily those of the NIHR, the NHS or the Department of health; DvdW is a  
20 member of PROGRESS Medical Research Council Prognosis Research Strategy  
21 (PROGRESS) Partnership (G0902393/99558); no other relationships or activities that could  
22 appear to have influenced the submitted work."  
23

### 24 **Details of contributors**

25  
26 CB, LC, YC and DvdW all contributed to the initial draft and subsequent revisions. CB is the  
27 guarantor of the paper. All authors had full access to all of the data and can take  
28 responsibility for the integrity of the data and the accuracy of the data analysis. CB affirms  
29 that the manuscript is an honest, accurate, and transparent account of the study being  
30 reported; that no important aspects of the study have been omitted and that any  
31 discrepancies from the study as planned have been explained.  
32

### 33 **Data sharing**

34 To ensure patient privacy and confidentiality, data from the CPRD cannot be shared.  
35 Therefore, no additional data are available.  
36

### 37 **Copyright, open access and permission to reuse**

38  
39 The Corresponding Author has the right to grant on behalf of all authors and does grant on  
40 behalf of all authors, [a worldwide licence](#) to the Publishers and its licensees in perpetuity, in  
41 all forms, formats and media (whether known now or created in the future), to i) publish,  
42 reproduce, distribute, display and store the Contribution, ii) translate the Contribution into  
43 other languages, create adaptations, reprints, include within collections and create  
44 summaries, extracts and/or, abstracts of the Contribution, iii) create any other derivative  
45 work(s) based on the Contribution, iv) to exploit all subsidiary rights in the Contribution, v)  
46 the inclusion of electronic links from the Contribution to third party material where-ever it may  
47 be located; and, vi) licence any third party to do any or all of the above.  
48

### 49 **References**

50  
51 1 Alfonso C, Jann S, Massa R, et al. Diagnosis, treatment and follow-up of the carpal tunnel  
52 syndrome: A review. *Neurological Sciences* 2010;31:243-52.  
53

54 2 Aroori S, Spence RA. Carpal tunnel syndrome. *Ulster Med J* 2008;77:6-17.  
55  
56  
57  
58  
59  
60

- 1  
2  
3 3 Padua L, Padua R, Lo Monaco M, et al. Multiperspective assessment of carpal tunnel  
4 syndrome: A multicenter study. *Neurology* 1999;53:1654-9.
- 5  
6 4 Foley M, Silverstein B, Polissar N. The economic burden of carpal tunnel syndrome: long-  
7 term earnings of CTS claimants in Washington State. *Am J Ind Med* 2007;50:155-72.
- 8  
9 5 Atroshi I, Gummesson C, Johnsson R, et al. Symptoms, disability, and quality of life in  
10 patients with carpal tunnel syndrome. *Journal of Hand Surgery - American Volume*  
11 1999;24:398-404.
- 12  
13 6 Padua L, Coraci D, Erra C, et al. Carpal tunnel syndrome: clinical features, diagnosis, and  
14 management. *Lancet Neurol* 2016;15:1273-84 doi:S1474-4422(16)30231-9 [pii].
- 15  
16 7 American Academy of Orthopaedic Surgeons. Clinical practice guideline on the diagnosis  
17 of carpal tunnel syndrome 2007.
- 18  
19 8 Carpal Tunnel Syndrome. Available at: [http://cks.nice.org.uk/carpal-tunnel-](http://cks.nice.org.uk/carpal-tunnel-syndrome#!scenario recommendation:1)  
20 [syndrome#!scenario recommendation:1](http://cks.nice.org.uk/carpal-tunnel-syndrome#!scenario recommendation:1). Accessed 05/14, 2013.
- 21  
22 9 Carpal Tunnel Syndrome (CTS) - The Map of Medicine. Available at:  
23 <http://app.mapofmedicine.com/mom/127/page.html?department-id=8&specialty->  
24 [id=1037&pathway-id=3411&page-id=8741&history=clear](http://app.mapofmedicine.com/mom/127/page.html?department-id=8&specialty-). Accessed 25/10/2012, 2012.
- 25  
26 10 Royal College of Surgeons. Commissioning Guide: Treatment of Carpal Tunnel  
27 Syndrome 2016.
- 28  
29 11 Middleton SD, Anakwe RE. *BMJ* 2014;349 doi:10.1136/bmj.g6437.
- 30  
31 12 Ferry S, Pritchard T, Keenan J, et al. Estimating the prevalence of delayed median nerve  
32 conduction in the general population. *Br J Rheumatol* 1998;37:630-5.
- 33  
34 13 de Krom MC, Knipschild PG, Kester AD, et al. Carpal tunnel syndrome: prevalence in the  
35 general population. *J Clin Epidemiol* 1992;45:373-6.
- 36  
37 14 Atroshi I. Carpal tunnel syndrome--prevalence, electrodiagnosis and outcome  
38 instruments. *Acta Orthop Scand* 1999;70:70-1.
- 39  
40 15 Papanicolaou GD, McCabe SJ, Firrell J. The prevalence and characteristics of nerve  
41 compression symptoms in the general population. *Journal of Hand Surgery - American*  
42 *Volume* 2001;26:460-6.
- 43  
44 16 Latinovic R, Gulliford MC, Hughes RA. Incidence of common compressive neuropathies  
45 in primary care. *J Neurol Neurosurg Psychiatry* 2006;77:263-5  
46 doi:10.1136/jnnp.2005.066696.
- 47  
48 17 Bland JDP, Rudolfer SM. Clinical surveillance of carpal tunnel syndrome in two areas of  
49 the United Kingdom, 1991–2001. *Journal of Neurology, Neurosurgery & Psychiatry*  
50 2003;74:1674-9 doi:10.1136/jnnp.74.12.1674.
- 51  
52 18 Gelfman R, Melton LJ, 3rd, Yawn BP, et al. Long-term trends in carpal tunnel syndrome.  
53 *Neurology* 2009;72:33-41 doi:10.1212/01.wnl.0000338533.88960.b9;  
54 10.1212/01.wnl.0000338533.88960.b9.
- 55  
56  
57  
58  
59  
60

1  
2  
3 19 Bongers FJ, Schellevis FG, van den Bosch WJ, et al. Carpal tunnel syndrome in general  
4 practice (1987 and 2001): incidence and the role of occupational and non-occupational  
5 factors. *Br J Gen Pract* 2007;57:36-9.

6  
7 20 Atroshi I, Englund M, Turkiewicz A, et al. Incidence of physician-diagnosed carpal tunnel  
8 syndrome in the general population. *Arch Intern Med* 2011;171:943-5.

9  
10 21 Jenkins PJ, Watts AC, Duckworth AD, et al. Socioeconomic deprivation and the  
11 epidemiology of carpal tunnel syndrome. *Journal of Hand Surgery-European Volume*  
12 2012;37E:123-9 doi:10.1177/1753193411419952.

13  
14 22 Jenkins PJ, Srikantharajah D, Duckworth AD, et al. Carpal tunnel syndrome: the  
15 association with occupation at a population level. *Journal of Hand Surgery-European*  
16 *Volume* 2013;38E:67-72 doi:10.1177/1753193412455790.

17  
18 23 Nordstrom DL, DeStefano F, Vierkant RA, et al. Incidence of diagnosed carpal tunnel  
19 syndrome in a general population. *Epidemiology* 1998;9:342-5.

20  
21 24 Wildin C, Dias JJ, Heras-Palou C, et al. Trends in elective hand surgery referrals from  
22 primary care. *Ann R Coll Surg Engl* 2006;88:543-6 doi:10.1308/003588406X117070.

23  
24 25 Bebbington E, Furniss D. Linear regression analysis of Hospital Episode Statistics  
25 predicts a large increase in demand for elective hand surgery in England. *J Plast Reconstr*  
26 *Aesthet Surg* 2015;68:243-51 doi:10.1016/j.bjps.2014.10.011 [doi].

27  
28 26 Herrett E, Gallagher AM, Bhaskaran K, et al. Data Resource Profile: Clinical Practice  
29 Research Datalink (CPRD). *Int J Epidemiol* 2015;44:827-36 doi:10.1093/ije/dyv098 [doi].

30  
31 27 Chisholm J. The Read clinical classification. *BMJ* 1990;300:1092.

32  
33 28 Jordan K, Porcheret M, Croft P. Quality of morbidity coding in general practice  
34 computerized medical records: a systematic review. *Fam Pract* 2004;21:396-412  
35 doi:10.1093/fampra/cmh409 [doi].

36  
37 29 Population Estimates. Available at:  
38 <https://www.ons.gov.uk/peoplepopulationandcommunity/populationandmigration/populationestimates>.  
39 Accessed 02/16, 2017.

40  
41 30 National Cancer Institute. Joinpoint Regression Program - Surveillance Research  
42 Program 2017.

43  
44 31 Bedson J, Chen Y, Hayward RA, et al. Trends in long-term opioid prescribing in primary  
45 care patients with musculoskeletal conditions: an observational database study. *Pain*  
46 2016;157:1525-31 doi:10.1097/j.pain.0000000000000557.

47  
48 32 Descatha A, Dale AM, Franzblau A, et al. Comparison of research case definitions for  
49 carpal tunnel syndrome. *Scand J Work Environ Health* 2011;37:298-306  
50 doi:10.5271/sjweh.3148.

51  
52 33 NHS Executive. *Information for Health: An Information Strategy for the Modern NHS*  
53 *1998–2005. A National Strategy for Local Implementation* 1998.

1  
2  
3 34 Porcheret M, Hughes R, Evans D, et al. Data quality of general practice electronic health  
4 records: the impact of a program of assessments, feedback, and training. *Journal of the*  
5 *American Medical Informatics Association* 2004;11:78-86  
6 doi:<http://dx.doi.org/10.1197/jamia.M1362>.

7  
8 35 Lewis R, Appleby J. Can the English NHS meet the 18-week waiting list target?. *J R Soc*  
9 *Med* 2006;99:10-3.

10  
11 36 Pourmemari MH, Shiri R. Diabetes as a risk factor for carpal tunnel syndrome: a  
12 systematic review and meta-analysis. *Diabetic Med* 2016;33:10-6 doi:10.1111/dme.12855.

13  
14 37 Shiri R, Pourmemari MH, Falah-Hassani K, et al. The effect of excess body mass on the  
15 risk of carpal tunnel syndrome: a meta-analysis of 58 studies. *Obesity Reviews*  
16 2015;16:1094-104 doi:10.1111/obr.12324.

17  
18 38 Herrett E, Thomas SL, Schoonen WM, et al. Validation and validity of diagnoses in the  
19 General Practice Research Database: a systematic review. *Br J Clin Pharmacol* 2009;69:4-  
20 14 doi:10.1111/j.1365-2125.2009.03537.x.

21  
22 39 Jordan K, Clarke AM, Symmons DP, et al. Measuring disease prevalence: a comparison  
23 of musculoskeletal disease using four general practice consultation databases. *Br J Gen*  
24 *Pract* 2007;57:7-14.

25  
26 40 Turner A, Kimble F, Gulyás K, et al. Can the outcome of open carpal tunnel release be  
27 predicted?: a review of the literature. *ANZ J Surg* 2010;80:50-4 doi:10.1111/j.1445-  
28 2197.2009.05175.x.

29  
30 41 Louie DL, Earp BE, Collins JE, et al. *The Journal of Bone & Joint Surgery* 2013;95:1067-  
31 73 doi:10.2106/JBJS.L.00903.

32  
33 42 Marshall S, Tardif G, Ashworth N. Local corticosteroid injection for carpal tunnel  
34 syndrome. *Cochrane database of systematic reviews (Online)* 2007:001554.

35  
36 43 Page MJ, Massy-Westropp N, O'Connor D, et al. Splinting for carpal tunnel syndrome.  
37 *Cochrane Database Syst Rev* 2012;7:CD010003 doi:10.1002/14651858.CD010003.

38  
39 44 Mondelli M, Giannini F, Giacchi M. Carpal tunnel syndrome incidence in a general  
40 population. *Neurology* 2002;58:289-94.

41  
42 45 Dieleman JP, Kerklaan J, Huygen FJ, et al. Incidence rates and treatment of neuropathic  
43 pain conditions in the general population. *Pain* 2008;137:681-8  
44 doi:10.1016/j.pain.2008.03.002 [doi].

45  
46 46 Gelfman R, Melton LJ, 3rd, Yawn BP, et al. Long-term trends in carpal tunnel syndrome.  
47 *Neurology* 2009;72:33-41 doi:10.1212/01.wnl.0000338533.88960.b9;  
48 10.1212/01.wnl.0000338533.88960.b9.

49  
50 47 Dale AM, Harris-Adamson C, Rempel D, et al. Prevalence and incidence of carpal tunnel  
51 syndrome in US working populations: Pooled analysis of six prospective studies.  
52 *Scandinavian Journal of Work, Environment and Health* 2013;39:495-505.

53  
54  
55 Supplementary tables



1  
2  
3 Suppl. Table 1. Demographics of the crude prevalent population presenting with CTS in  
4 each calendar year  
5

6  
7 Suppl. Table 2. Demographics of the crude incident population presenting with CTS in each  
8 calendar year  
9

10  
11 Suppl. Table 3 The age and sex standardised estimates of the annual prevalence and  
12 incidence of CTS  
13

14  
15  
16 Suppl. Table 4 Comparison of population studies reporting the prevalence and / or incidence  
17 of carpal tunnel syndrome  
18

19  
20 Suppl. Table 5 summary of reported prevalence and incidence by gender  
21  
22  
23  
24  
25  
26  
27  
28  
29  
30  
31  
32  
33  
34  
35  
36  
37  
38  
39  
40  
41  
42  
43  
44  
45  
46  
47  
48  
49  
50  
51  
52  
53  
54  
55  
56  
57  
58  
59  
60

Table 1 Readcodes used to define a prevalent or incident episode of carpal tunnel syndrome

| <b>Term</b>                      | <b>Read code</b> |
|----------------------------------|------------------|
| Carpal tunnel syndrome           | F340             |
| Injection of carpal tunnel       | 85BE.00          |
| Carpal tunnel release            | 70560            |
| Endoscopic carpal tunnel release | 7056011          |
| Carpal tunnel decompression      | 70564            |

For peer review only

1  
2  
3  
4  
5  
6  
7  
8  
9  
10  
11  
12  
13  
14  
15  
16  
17  
18  
19  
20  
21  
22  
23  
24  
25  
26  
27  
28  
29  
30  
31  
32  
33  
34  
35  
36  
37  
38  
39  
40  
41  
42  
43  
44  
45  
46  
47  
48  
49  
50  
51  
52  
53  
54  
55  
56  
57  
58  
59  
60

Table 2 Read codes used to define a surgical episode

| <b>Term</b>                       | <b>Read code</b> |
|-----------------------------------|------------------|
| Carpal tunnel release             | 817              |
| Re-release of carpal tunnel       | 16896            |
| Endoscopic carpal tunnel release  | 39335            |
| Revision of carpal tunnel release | 97195            |
| Carpal tunnel decompression       | 19249            |

For peer review only

| Year | Number of person years | Prevalent individuals | Total crude prevalence per 10,000 person years, (95% confidence interval) | Female prevalence per 10,000 person years, (95% confidence interval) | Male prevalence per 10,000 person years, (95% confidence interval) | Female: male |
|------|------------------------|-----------------------|---------------------------------------------------------------------------|----------------------------------------------------------------------|--------------------------------------------------------------------|--------------|
| 1993 | 1117443                | 2909                  | 26.03 (25.10 – 27.00)                                                     | 37.52 (35.96 – 39.13)                                                | 13.69 (12.72 – 14.71)                                              | 2.74         |
| 1994 | 1198256                | 3188                  | 26.61 (25.69 – 27.55)                                                     | 37.23 (35.73 – 38.79)                                                | 15.21 (14.23 – 16.25)                                              | 2.45         |
| 1995 | 1286800                | 3343                  | 25.98 (25.11 – 26.88)                                                     | 36.64 (35.20 – 38.12)                                                | 14.58 (13.65 – 15.56)                                              | 2.51         |
| 1996 | 1437567                | 3706                  | 25.78 (24.96 – 26.62)                                                     | 36.75 (35.38 – 38.16)                                                | 14.09 (13.23 – 15.00)                                              | 2.61         |
| 1997 | 1681756                | 4190                  | 24.91 (24.17 – 25.68)                                                     | 34.87 (33.64 – 36.14)                                                | 14.34 (13.53 – 15.18)                                              | 2.43         |
| 1998 | 1899393                | 4884                  | 25.71 (25.00 – 26.45)                                                     | 36.57 (35.38 – 37.79)                                                | 14.22 (13.46 – 15.01)                                              | 2.57         |
| 1999 | 2289158                | 5696                  | 24.88 (24.24 – 25.54)                                                     | 35.21 (34.14 – 36.30)                                                | 14.01 (13.32 – 14.72)                                              | 2.52         |
| 2000 | 2787457                | 6998                  | 25.11 (24.52 – 25.70)                                                     | 34.82 (33.86 – 35.81)                                                | 14.90 (14.26 – 15.57)                                              | 2.34         |
| 2001 | 3057458                | 8137                  | 26.61 (26.04 – 27.20)                                                     | 36.46 (35.52 – 37.42)                                                | 16.31 (15.67 – 16.98)                                              | 2.23         |
| 2002 | 3385511                | 9722                  | 28.72 (28.15 – 29.29)                                                     | 39.33 (38.40 – 40.28)                                                | 17.64 (17.00 – 18.29)                                              | 2.23         |
| 2003 | 3552908                | 11124                 | 31.31 (30.73 – 31.90)                                                     | 43.61 (42.66 – 44.59)                                                | 18.53 (17.90 – 19.18)                                              | 2.35         |
| 2004 | 3712172                | 12622                 | 34.00 (33.41 – 34.60)                                                     | 47.20 (46.23 – 48.19)                                                | 20.33 (19.68 – 20.99)                                              | 2.32         |
| 2005 | 3808183                | 12741                 | 33.46 (32.88 – 34.04)                                                     | 46.37 (45.42 – 47.34)                                                | 20.09 (19.45 – 20.74)                                              | 2.31         |
| 2006 | 3857487                | 12718                 | 32.97 (32.40 – 33.55)                                                     | 45.82 (44.88 – 46.78)                                                | 19.69 (19.07 – 20.33)                                              | 2.33         |
| 2007 | 3904068                | 13222                 | 33.87 (33.29 – 34.45)                                                     | 46.35 (45.41 – 47.31)                                                | 20.99 (20.35 – 21.65)                                              | 2.21         |
| 2008 | 3897624                | 14030                 | 36.00 (35.40 – 36.60)                                                     | 49.12 (48.15 – 50.11)                                                | 22.46 (21.79 – 23.14)                                              | 2.19         |
| 2009 | 3894989                | 14500                 | 37.23 (36.60 – 37.81)                                                     | 50.68 (49.69 – 51.68)                                                | 23.35 (22.68 – 24.05)                                              | 2.17         |
| 2010 | 3842773                | 14166                 | 36.86 (36.26 – 37.48)                                                     | 49.75 (48.76 – 50.75)                                                | 23.57 (22.88 – 24.27)                                              | 2.11         |
| 2011 | 3769676                | 13529                 | 35.89 (35.29 – 36.50)                                                     | 47.98 (47.00 – 48.97)                                                | 23.36 (22.67 – 24.07)                                              | 2.05         |
| 2012 | 3714877                | 13388                 | 36.04 (35.43 – 36.66)                                                     | 47.57 (46.59 – 48.56)                                                | 24.05 (23.35 – 24.78)                                              | 1.98         |
| 2013 | 3473094                | 12532                 | 36.08 (35.45 – 36.72)                                                     | 47.19 (46.18 – 48.21)                                                | 24.49 (23.75 – 25.25)                                              | 1.93         |

Table 3 Crude prevalence of carpal tunnel syndrome (n/10,000 person years) per calendar year, as presented in UK primary care (CPRD)

1  
2  
3  
4  
5  
6  
7  
8  
9  
10  
11  
12  
13  
14  
15  
16  
17  
18  
19  
20  
21  
22  
23  
24  
25  
26  
27  
28  
29  
30  
31  
32  
33  
34  
35  
36  
37  
38  
39  
40  
41  
42  
43  
44  
45  
46  
47

For peer review only

Table 4 Crude incidence of carpal tunnel syndrome (n/10,000 person years) per calendar year, as presented in UK primary care (CPRD)

| Year | Number of person years | Incident individuals | Total crude incidence per 10,000 person years, (95% confidence interval) | Female incidence per 10,000 person years, (95% confidence interval) | Male incidence per 10,000 person years, (95% confidence interval) | Female: male |
|------|------------------------|----------------------|--------------------------------------------------------------------------|---------------------------------------------------------------------|-------------------------------------------------------------------|--------------|
| 1993 | 783330                 | 1584                 | 20.22 (19.24 – 21.24)                                                    | 28.72 (27.09 – 30.42)                                               | 11.17 (10.14 – 12.29)                                             | 2.57         |
| 1994 | 868616                 | 1797                 | 20.69 (19.74 – 21.67)                                                    | 28.52 (26.97 – 30.13)                                               | 12.38 (11.34 – 13.69)                                             | 2.30         |
| 1995 | 1003593                | 1963                 | 19.56 (18.70 – 20.45)                                                    | 27.53 (26.12 – 29.00)                                               | 11.12 (10.20 – 12.10)                                             | 2.48         |
| 1996 | 1065068                | 2142                 | 20.11 (19.27 – 20.98)                                                    | 28.39 (27.00 – 29.84)                                               | 11.37 (10.47 – 12.33)                                             | 2.50         |
| 1997 | 1150299                | 2306                 | 20.05 (19.24 – 20.88)                                                    | 28.39 (27.05 – 29.79)                                               | 11.25 (10.39 – 12.16)                                             | 2.52         |
| 1998 | 1300074                | 2696                 | 20.74 (19.95 – 21.52)                                                    | 29.65 (28.57 – 31.22)                                               | 11.37 (10.56 – 12.23)                                             | 2.61         |
| 1999 | 1497673                | 3030                 | 20.23 (19.52 – 20.10)                                                    | 28.53 (27.35 – 29.75)                                               | 11.54 (10.77 – 12.34)                                             | 2.47         |
| 2000 | 1682027                | 3462                 | 20.58 (19.90 – 21.28)                                                    | 28.66 (27.54 – 29.81)                                               | 12.15 (11.41 – 12.93)                                             | 2.36         |
| 2001 | 2019596                | 4391                 | 21.74 (21.10 – 22.40)                                                    | 29.72 (28.68 – 30.79)                                               | 13.46 (12.74 – 14.20)                                             | 2.21         |
| 2002 | 2456761                | 5718                 | 23.27 (22.68 – 31.78)                                                    | 31.78 (30.78 – 32.79)                                               | 14.47 (13.80 – 15.17)                                             | 2.20         |
| 2003 | 2669111                | 6772                 | 25.37 (24.77 – 25.98)                                                    | 35.13 (34.14 – 36.14)                                               | 15.33 (14.67 – 16.02)                                             | 2.29         |
| 2004 | 2779821                | 7868                 | 28.30 (27.68 – 28.94)                                                    | 39.22 (38.19 – 40.27)                                               | 17.10 (16.42 – 17.81)                                             | 2.29         |
| 2005 | 3164506                | 8113                 | 25.64 (25.08 – 26.20)                                                    | 35.55 (34.63 – 36.48)                                               | 15.49 (14.88 – 16.12)                                             | 2.30         |
| 2006 | 3307051                | 8337                 | 25.21 (24.67 – 25.76)                                                    | 34.91 (34.02 – 35.82)                                               | 15.27 (14.68 – 15.89)                                             | 2.29         |
| 2007 | 3343009                | 8865                 | 26.52 (25.97 – 27.08)                                                    | 35.76 (34.86 – 36.67)                                               | 17.07 (16.45 – 17.71)                                             | 2.09         |
| 2008 | 3341299                | 9437                 | 28.24 (27.68 – 28.82)                                                    | 38.23 (37.30 – 39.17)                                               | 18.06 (17.42 – 18.72)                                             | 2.12         |
| 2009 | 3383196                | 9918                 | 29.32 (28.74 – 29.90)                                                    | 39.73 (38.79 – 50.68)                                               | 18.69 (18.04 – 19.36)                                             | 2.13         |
| 2010 | 3357338                | 9634                 | 28.70 (28.13 – 29.27)                                                    | 38.70 (37.77 – 39.64)                                               | 18.46 (17.82 – 19.13)                                             | 2.10         |
| 2011 | 3269296                | 9083                 | 27.78 (27.21 – 28.36)                                                    | 37.11 (36.19 – 38.05)                                               | 18.20 (17.54 – 18.87)                                             | 2.04         |
| 2012 | 3222880                | 9011                 | 27.96 (27.39 – 28.54)                                                    | 36.44 (35.52 – 37.88)                                               | 19.23 (18.56 – 19.93)                                             | 1.89         |
| 2013 | 3015670                | 8346                 | 27.68 (27.09 – 28.28)                                                    | 35.95 (35.01 – 36.92)                                               | 19.12 (18.43 – 19.84)                                             | 1.88         |

1  
2  
3  
4  
5  
6  
7  
8  
9  
10  
11  
12  
13  
14  
15  
16  
17  
18  
19  
20  
21  
22  
23  
24  
25  
26  
27  
28  
29  
30  
31  
32  
33  
34  
35  
36  
37  
38  
39  
40  
41  
42  
43  
44  
45  
46  
47

Table 5 Percentage of patients with carpal tunnel syndrome with a recorded episode of carpal tunnel release surgery per calendar year, as presented in UK primary care (CPRD)

| Year | Episodes per 10,000 person years | % prevalent individuals having surgery | % prevalent females having surgery | % prevalent males having surgery | Female median age (25% - 75% Interquartile range) | Male median age (25% - 75% Interquartile range) |
|------|----------------------------------|----------------------------------------|------------------------------------|----------------------------------|---------------------------------------------------|-------------------------------------------------|
| 1993 | 5.04                             | 19.35                                  | 18.78                              | 21.03                            | 53 (43 – 64)                                      | 55 (44 – 69)                                    |
| 1994 | 5.70                             | 21.42                                  | 20.62                              | 23.52                            | 53 (43 – 68)                                      | 58 (45 – 70)                                    |
| 1995 | 6.19                             | 23.81                                  | 23.40                              | 24.92                            | 53 (42 – 67)                                      | 55 (44 – 70)                                    |
| 1996 | 5.41                             | 20.99                                  | 20.48                              | 22.43                            | 53 (44 – 65)                                      | 52 (40 – 65)                                    |
| 1997 | 5.70                             | 22.89                                  | 22.14                              | 24.81                            | 53 (45 – 67)                                      | 56 (42 – 69)                                    |
| 1998 | 5.73                             | 22.28                                  | 21.28                              | 25.00                            | 53 (44 – 65)                                      | 53 (44 – 65)                                    |
| 1999 | 6.24                             | 25.09                                  | 24.60                              | 26.38                            | 54 (44 – 67)                                      | 56 (46 – 70)                                    |
| 2000 | 6.41                             | 25.54                                  | 24.84                              | 27.23                            | 54 (44 – 68)                                      | 56 (45 – 69)                                    |
| 2001 | 6.88                             | 25.87                                  | 25.95                              | 25.68                            | 55 (45 – 68)                                      | 58 (46 – 71)                                    |
| 2002 | 7.02                             | 24.46                                  | 24.19                              | 25.09                            | 57 (46 – 71)                                      | 55 (45 – 68)                                    |
| 2003 | 8.26                             | 26.39                                  | 25.88                              | 27.66                            | 56 (45 – 67)                                      | 57 (46 – 71)                                    |
| 2004 | 9.34                             | 27.48                                  | 27.38                              | 27.74                            | 56 (46 – 67)                                      | 57 (47 – 68)                                    |
| 2005 | 9.70                             | 29.00                                  | 28.31                              | 30.65                            | 57 (47 – 68)                                      | 58 (46 – 71)                                    |
| 2006 | 9.36                             | 28.40                                  | 28.31                              | 28.61                            | 57 (47 – 68)                                      | 60 (48 – 72)                                    |
| 2007 | 9.71                             | 28.66                                  | 28.26                              | 29.59                            | 56 (46 – 69)                                      | 59 (48 – 71)                                    |
| 2008 | 10.53                            | 29.25                                  | 29.00                              | 29.82                            | 56 (46 – 68)                                      | 60 (49 – 72)                                    |
| 2009 | 10.92                            | 29.32                                  | 28.73                              | 30.66                            | 56 (46 – 70)                                      | 61 (49 – 72)                                    |
| 2010 | 10.40                            | 28.22                                  | 27.57                              | 29.62                            | 57 (47 – 71)                                      | 61 (48 – 73)                                    |
| 2011 | 9.47                             | 26.37                                  | 26.11                              | 26.93                            | 57 (47 – 70)                                      | 61 (49 – 73)                                    |
| 2012 | 9.48                             | 26.31                                  | 25.89                              | 27.19                            | 57 (47 – 71)                                      | 60 (49 – 73)                                    |
| 2013 | 9.89                             | 27.41                                  | 26.47                              | 29.30                            | 57 (48 – 70)                                      | 62 (51 – 74)                                    |

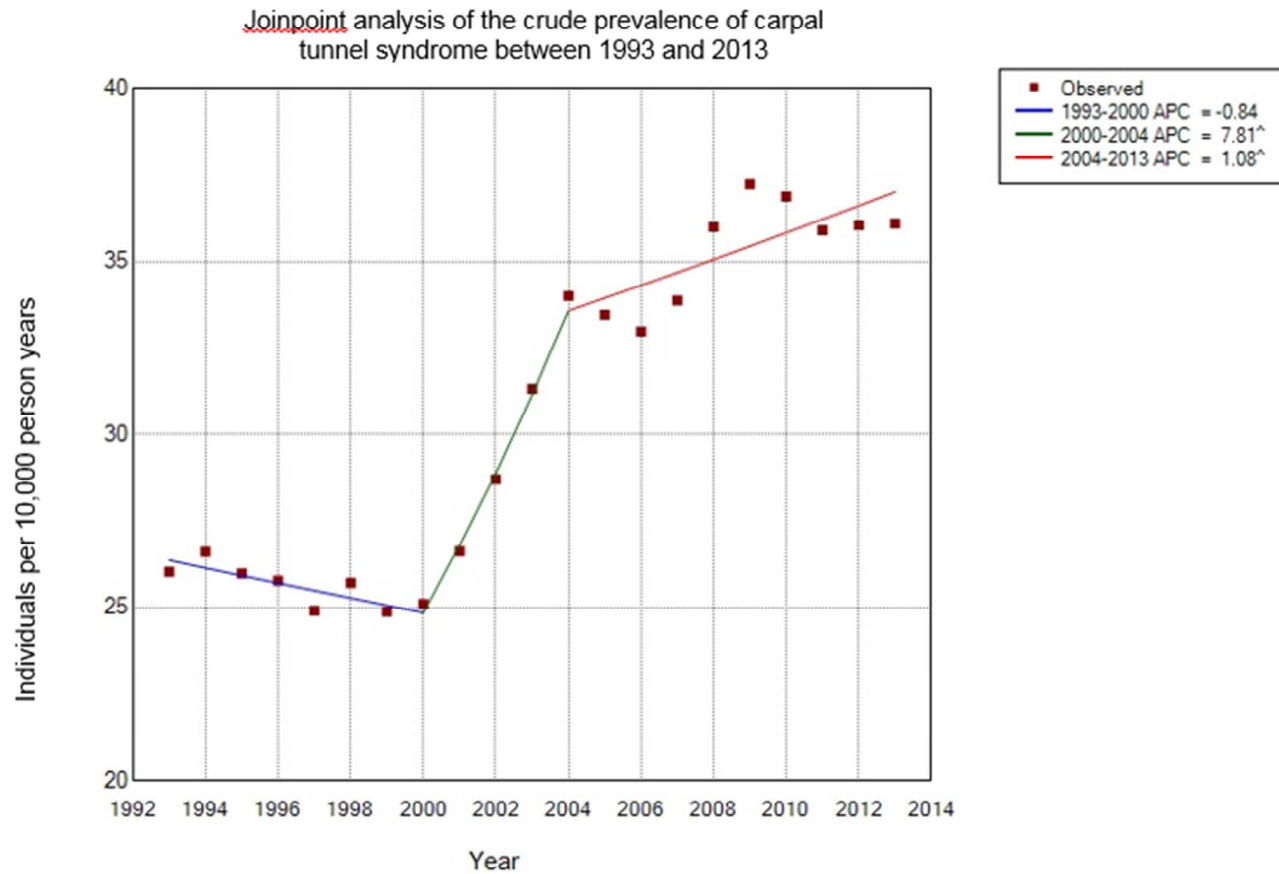

Figure 1 Joinpoint analysis of the crude prevalence of carpal tunnel syndrome between 1993 and 2013

APC = annual percentage change, which is significantly different from zero, significance level  $p < 0.05$



1  
2  
3  
4  
5  
6  
7  
8  
9  
10  
11  
12  
13  
14  
15  
16  
17  
18  
19  
20  
21  
22  
23  
24  
25  
26  
27  
28  
29  
30  
31  
32  
33  
34  
35  
36  
37  
38  
39  
40  
41  
42  
43  
44  
45  
46  
47

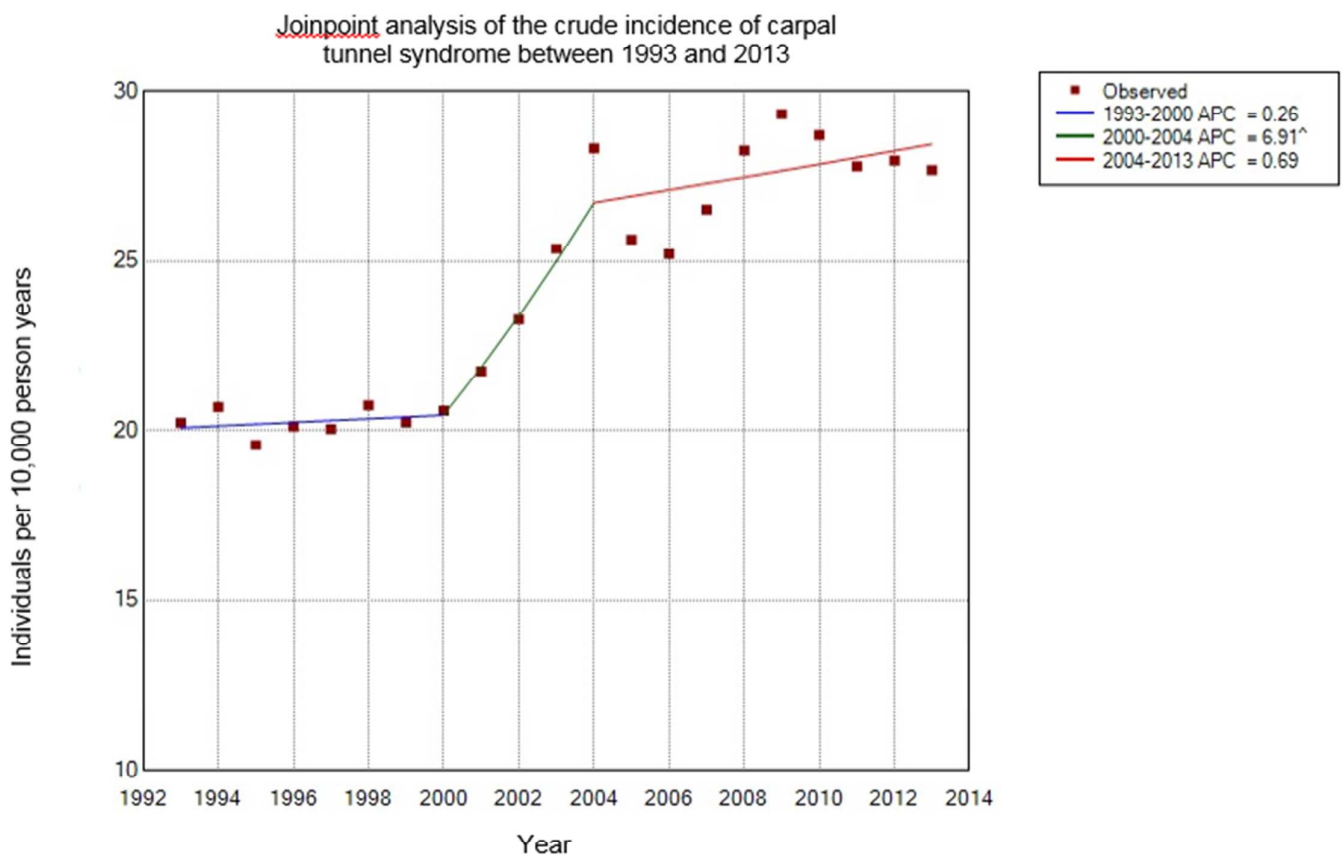

Figure 2 Joinpoint analysis of crude incidence

APC = annual percentage change, which is significantly different from zero, significance level  $p < 0.05$

Joinpoint analysis of the percentage of prevalent patients with a recorded episode of carpal tunnel release, in each calendar year syndrome, between 1993 and 2013

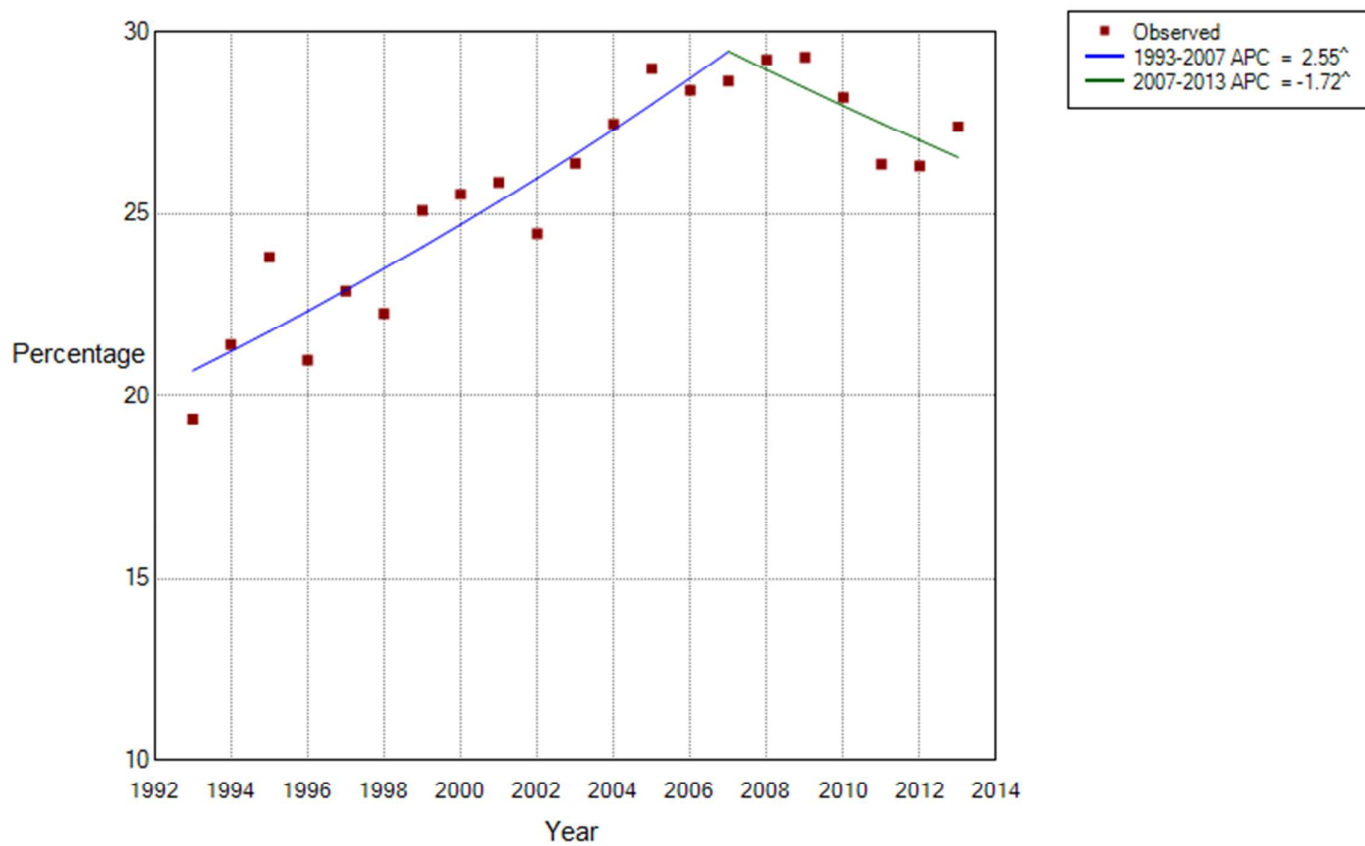

Figure 3 Joinpoint analysis of percentage of prevalent patients having carpal tunnel surgery

APC = annual percentage change, which is significantly different from zero, significance level  $p < 0.05$

Suppl. Table 1. Demographics of the crude prevalent population presenting with CTS in each calendar year

| <b>Year</b> | <b>Female median age<br/>(25% - 75%<br/>Interquartile range)</b> | <b>Male median age<br/>(25% - 75%<br/>Interquartile<br/>range)</b> |
|-------------|------------------------------------------------------------------|--------------------------------------------------------------------|
| 1993        | 49 (38 – 62)                                                     | 53 (42 – 66)                                                       |
| 1994        | 49 (39 – 62)                                                     | 53 (42 – 66)                                                       |
| 1995        | 50 (39 – 62)                                                     | 52 (41 – 64)                                                       |
| 1996        | 50 (40 – 62)                                                     | 53 (41 – 66)                                                       |
| 1997        | 51 (40 – 62)                                                     | 53 (42 – 67)                                                       |
| 1998        | 51 (40 – 62)                                                     | 54 (43 – 67)                                                       |
| 1999        | 51 (40 – 62)                                                     | 54 (44 – 66)                                                       |
| 2000        | 52 (41 – 64)                                                     | 55 (44 – 67)                                                       |
| 2001        | 53 (42 – 65)                                                     | 55 (44 – 68)                                                       |
| 2002        | 53 (41 – 64)                                                     | 55 (44 – 67)                                                       |
| 2003        | 54 (42 – 65)                                                     | 55 (44 – 68)                                                       |
| 2004        | 55 (43 – 65)                                                     | 56 (45 – 68)                                                       |
| 2005        | 54 (43 – 65)                                                     | 58 (45 – 70)                                                       |
| 2006        | 54 (43 – 66)                                                     | 58 (45 – 70)                                                       |
| 2007        | 54 (42 – 66)                                                     | 54 (42 – 66)                                                       |
| 2008        | 54 (43 – 66)                                                     | 58 (46 – 70)                                                       |
| 2009        | 54 (43 – 67)                                                     | 58 (47 – 70)                                                       |
| 2010        | 54 (43 – 67)                                                     | 57 (46 – 71)                                                       |
| 2011        | 54 (43 – 67)                                                     | 58 (47 – 71)                                                       |
| 2012        | 54 (43 – 67)                                                     | 59 (48 – 71)                                                       |
| 2013        | 54 (44 – 67)                                                     | 59 (48 – 72)                                                       |

Suppl. Table 2. Demographics of the crude incident population presenting with CTS in each calendar year

| <b>Year</b> | <b>Female median age<br/>(25% - 75%<br/>Interquartile range)</b> | <b>Male median age<br/>(25% - 75%<br/>Interquartile range)</b> |
|-------------|------------------------------------------------------------------|----------------------------------------------------------------|
| 1993        | 50 (39 – 63)                                                     | 51 (42 – 65)                                                   |
| 1994        | 50 (40 – 63)                                                     | 53 (43 – 66)                                                   |
| 1995        | 51 (40 – 63)                                                     | 53 (42 – 64)                                                   |
| 1996        | 51 (40 – 64)                                                     | 52 (41 – 65)                                                   |
| 1997        | 51 (40 – 64)                                                     | 55 (45 – 67)                                                   |
| 1998        | 51 (40 – 63)                                                     | 54 (44 – 68)                                                   |
| 1999        | 52 (41 – 64)                                                     | 55 (45 – 67)                                                   |
| 2000        | 53 (42 – 65)                                                     | 55 (44 – 68)                                                   |
| 2001        | 53 (42 – 66)                                                     | 55 (45 – 68)                                                   |
| 2002        | 54 (42 – 66)                                                     | 55 (44 – 67)                                                   |
| 2003        | 55 (43 – 66)                                                     | 56 (45 – 68)                                                   |
| 2004        | 55 (44 – 66)                                                     | 57 (45 – 68)                                                   |
| 2005        | 55 (43 – 66)                                                     | 58 (46 – 70)                                                   |
| 2006        | 55 (44 – 67)                                                     | 58 (46 – 70)                                                   |
| 2007        | 54 (43 – 66)                                                     | 58 (47 – 70)                                                   |
| 2008        | 55 (44 – 67)                                                     | 58 (47 – 70)                                                   |
| 2009        | 55 (44 – 67)                                                     | 59 (47 – 71)                                                   |
| 2010        | 55 (44 – 68)                                                     | 57 (47 – 70)                                                   |
| 2011        | 55 (44 – 68)                                                     | 59 (48 – 71)                                                   |
| 2012        | 54 (44 – 67)                                                     | 59 (48 – 71)                                                   |
| 2013        | 55 (45 – 69)                                                     | 59 (48 – 71)                                                   |

Suppl. Table 3 The age and sex standardised estimates of the annual prevalence and incidence of CTS

| <b>Year</b> | <b>Age sex standardised prevalence (per 10,000 person years, 95% CI)</b> | <b>Age sex standardised incidence (per 10,000 person years, 95% CI)</b> |
|-------------|--------------------------------------------------------------------------|-------------------------------------------------------------------------|
| 1993        | 26.27 (26.13 – 26.42)                                                    | 19.95 (19.83 – 20.07)                                                   |
| 1994        | 26.83 (26.69 – 26.98)                                                    | 20.46 (20.34 – 20.59)                                                   |
| 1995        | 25.90 (25.77 – 26.05)                                                    | 19.20 (19.08 – 19.33)                                                   |
| 1996        | 25.64 (25.50 – 25.78)                                                    | 19.61 (19.49 – 19.74)                                                   |
| 1997        | 24.64 (24.20 – 25.07)                                                    | 19.42 (19.30 – 19.55)                                                   |
| 1998        | 25.42 (25.88 – 25.56)                                                    | 20.05 (19.93 – 20.18)                                                   |
| 1999        | 24.57 (24.44 – 24.71)                                                    | 19.51 (19.39 – 19.64)                                                   |
| 2000        | 24.77 (24.63 – 24.91)                                                    | 19.73 (19.61 – 19.86)                                                   |
| 2001        | 26.22 (26.08 – 26.36)                                                    | 20.75 (20.63 – 20.88)                                                   |
| 2002        | 28.22 (28.07 – 28.37)                                                    | 22.22 (22.10 – 22.36)                                                   |
| 2003        | 30.81 (30.65 – 30.96)                                                    | 24.28 (24.15 – 24.42)                                                   |
| 2004        | 33.51 (33.35 – 33.67)                                                    | 27.00 (26.86 – 27.14)                                                   |
| 2005        | 32.98 (32.82 – 33.14)                                                    | 24.56 (24.42 – 24.70)                                                   |
| 2006        | 32.55 (32.39 – 32.70)                                                    | 24.14 (24.00 – 24.27)                                                   |
| 2007        | 33.48 (33.32 – 33.64)                                                    | 25.52 (25.38 – 25.66)                                                   |
| 2008        | 35.59 (35.43 – 25.76)                                                    | 27.07 (26.92 – 27.21)                                                   |
| 2009        | 36.81 (36.64 – 36.98)                                                    | 28.19 (28.05 – 28.34)                                                   |
| 2010        | 36.40 (36.24 – 36.66)                                                    | 27.53 (27.39 – 27.68)                                                   |
| 2011        | 35.28 (35.12 – 35.44)                                                    | 26.59 (26.45 – 26.74)                                                   |
| 2012        | 35.50 (35.34 – 35.67)                                                    | 26.75 (26.61 – 26.89)                                                   |
| 2013        | 35.45 (35.29 – 35.61)                                                    | 26.34 (26.01 – 26.49)                                                   |

Suppl. Table 4 Comparison of population studies reporting the prevalence and / or incidence of carpal tunnel syndrome

| Study Identifier                     | Study method                                                                                                                                                                                                                                                                                    | Definition of CTS                                                                                                                                                                                               | Comments                                                                                                                             |
|--------------------------------------|-------------------------------------------------------------------------------------------------------------------------------------------------------------------------------------------------------------------------------------------------------------------------------------------------|-----------------------------------------------------------------------------------------------------------------------------------------------------------------------------------------------------------------|--------------------------------------------------------------------------------------------------------------------------------------|
| De Krom et al. 1992                  | Survey of a random age sex stratified sample of the general population taken from the population register of Maastricht between 1983 and 1985                                                                                                                                                   | Questionnaire based on symptoms and signs                                                                                                                                                                       | [13]                                                                                                                                 |
| Ferry et al. 1998                    | i) Cross sectional survey to estimate the point prevalence of hand symptoms (from a random sample of 1000 individuals from the UK general population, aged 18 to 75 years) and ii) nerve conduction testing of a weighted sample<br>- Circa. 1998 (not stated)<br>- point prevalence determined | Based on nerve conduction studies using defined cut offs                                                                                                                                                        | Subjects over 54yrs had a higher prevalence than younger participants. No difference between genders was noted.[12]                  |
| Nordstrom et al. 1998                | Prospective study conducted in the general population of the Marshfield Epidemiologic Study Area, Wisconsin, between 1991 and 1993                                                                                                                                                              | 1. any diagnosis of possible, probable or definite CTS;<br>2. any diagnosis of probable or definite CTS; and<br>3. any diagnosis of possible , probable or definite CTS plus at least one of six clinical signs | A 3.5 fold increase in CTS incidence was noted compared with data from 20 years previously in the same study population[23]          |
| Atroshi et al. 2000                  | Survey of a random sample of the age sex stratified general population of Southern Sweden, in 1997                                                                                                                                                                                              | Diagnosis based on clinical examination and positive electrophysiological findings                                                                                                                              | The population prevalence of symptoms was 14.4%; the prevalence of clinically and electrophysiologically confirmed CTS was 2.7% [14] |
| Papanicolaou, McCable & Firrell 2001 | Cross-sectional study to evaluate prevalence of carpal tunnel syndrome in the General population of the United States                                                                                                                                                                           | Katz hand diagram                                                                                                                                                                                               | After correcting for nonresponders the lowest possible estimate of CTS was 3.72% [15]                                                |

|    |                                       |                                                                                                                                                                                                |                                                                                                                                                                          |                                                                                                                                                                                                                             |
|----|---------------------------------------|------------------------------------------------------------------------------------------------------------------------------------------------------------------------------------------------|--------------------------------------------------------------------------------------------------------------------------------------------------------------------------|-----------------------------------------------------------------------------------------------------------------------------------------------------------------------------------------------------------------------------|
| 1  |                                       |                                                                                                                                                                                                |                                                                                                                                                                          |                                                                                                                                                                                                                             |
| 2  |                                       |                                                                                                                                                                                                |                                                                                                                                                                          |                                                                                                                                                                                                                             |
| 3  |                                       |                                                                                                                                                                                                |                                                                                                                                                                          |                                                                                                                                                                                                                             |
| 4  |                                       |                                                                                                                                                                                                |                                                                                                                                                                          |                                                                                                                                                                                                                             |
| 5  | Mondelli, Giannini & Giacchi<br>2002  | Prospective study of patients referred to four electrodiagnostic laboratories in the Siena area, Italy. Mean annual incidence calculated from time period 1991 to 1998                         | Diagnosis based on clinical history and electrodiagnostic evidence of a reduced distal conduction velocity of the median nerve (American Academy of Neurology standards) | Of the patients presenting 79.7% were women. The mean age at diagnosis was 55.0 +/- 14.4 years (range 16 to 97) [44]                                                                                                        |
| 6  |                                       |                                                                                                                                                                                                |                                                                                                                                                                          |                                                                                                                                                                                                                             |
| 7  |                                       |                                                                                                                                                                                                |                                                                                                                                                                          |                                                                                                                                                                                                                             |
| 8  |                                       |                                                                                                                                                                                                |                                                                                                                                                                          |                                                                                                                                                                                                                             |
| 9  |                                       |                                                                                                                                                                                                |                                                                                                                                                                          |                                                                                                                                                                                                                             |
| 10 | Bland, Rudolfer 2003                  | Prospective collection of neurophysiological and clinical data of patients referred to two electromyography clinics in the UK between 1991 to 1993 and 1992 to 2001                            | Based on nerve conduction studies using defined cut offs                                                                                                                 | An increase in diagnosed cases was observed between the two data collection periods; attributed to referral of milder cases. Median nerve impairment was more severe in the elderly and men at all ages. [17]               |
| 11 |                                       |                                                                                                                                                                                                |                                                                                                                                                                          |                                                                                                                                                                                                                             |
| 12 |                                       |                                                                                                                                                                                                |                                                                                                                                                                          |                                                                                                                                                                                                                             |
| 13 |                                       |                                                                                                                                                                                                |                                                                                                                                                                          |                                                                                                                                                                                                                             |
| 14 |                                       |                                                                                                                                                                                                |                                                                                                                                                                          |                                                                                                                                                                                                                             |
| 15 |                                       |                                                                                                                                                                                                |                                                                                                                                                                          |                                                                                                                                                                                                                             |
| 16 | Latinovic, Gulliford & Hughes<br>2006 | Population study based in a general practice database of consulting primary care patients from 253 practices between January 1992 and 31 December 2000.                                        | Read and Oxmis codes for carpal tunnel syndrome                                                                                                                          | Most frequent in women aged 45-54. In 2000 operative treatment was undertaken for 31% of incident CTS presentations [16]                                                                                                    |
| 17 |                                       |                                                                                                                                                                                                |                                                                                                                                                                          |                                                                                                                                                                                                                             |
| 18 |                                       |                                                                                                                                                                                                |                                                                                                                                                                          |                                                                                                                                                                                                                             |
| 19 |                                       |                                                                                                                                                                                                |                                                                                                                                                                          |                                                                                                                                                                                                                             |
| 20 |                                       |                                                                                                                                                                                                |                                                                                                                                                                          |                                                                                                                                                                                                                             |
| 21 |                                       |                                                                                                                                                                                                |                                                                                                                                                                          |                                                                                                                                                                                                                             |
| 22 | Bonger et al. 2007                    | Analysis of the first and second Dutch National Survey of General Practice, conducted in 1987 and 2001                                                                                         | (International Classification of Primary Care) ICPC coded diagnosis                                                                                                      | A crude increase in incidence over time was not statistically significant after subdividing by age and sex. Incidence rates were related to the job level in women, but not men [19]                                        |
| 23 |                                       |                                                                                                                                                                                                |                                                                                                                                                                          |                                                                                                                                                                                                                             |
| 24 |                                       |                                                                                                                                                                                                |                                                                                                                                                                          |                                                                                                                                                                                                                             |
| 25 |                                       |                                                                                                                                                                                                |                                                                                                                                                                          |                                                                                                                                                                                                                             |
| 26 |                                       |                                                                                                                                                                                                |                                                                                                                                                                          |                                                                                                                                                                                                                             |
| 27 | Dieleman et al. 2008                  | Population study based in a general practice database (Integrated Primary Care Information (IPCI) database): data of consulting primary care patients in the Netherlands between 1996 and 2003 | ICPC coded diagnosis                                                                                                                                                     | Neuropathic pain was noted to affect almost 1% of the population. Mononeuropathies and carpal tunnel syndrome were the most common causes [45]                                                                              |
| 28 |                                       |                                                                                                                                                                                                |                                                                                                                                                                          |                                                                                                                                                                                                                             |
| 29 |                                       |                                                                                                                                                                                                |                                                                                                                                                                          |                                                                                                                                                                                                                             |
| 30 |                                       |                                                                                                                                                                                                |                                                                                                                                                                          |                                                                                                                                                                                                                             |
| 31 |                                       |                                                                                                                                                                                                |                                                                                                                                                                          |                                                                                                                                                                                                                             |
| 32 | Gelfman et al. 2009                   | Analysis of medical records linkage system 1981-1985 to 2000-2005 of residents of Olmsted County, Minnesota (Rochester Epidemiology Project)                                                   | Clinical coding with a sample verified by full record review                                                                                                             | An increase in incidence was observed over the study period. An increase in young individuals seeking care for less severe CTS in the mid-1980's was followed in the 1990's by an increasing incidence in older people [46] |
| 33 |                                       |                                                                                                                                                                                                |                                                                                                                                                                          |                                                                                                                                                                                                                             |
| 34 |                                       |                                                                                                                                                                                                |                                                                                                                                                                          |                                                                                                                                                                                                                             |
| 35 |                                       |                                                                                                                                                                                                |                                                                                                                                                                          |                                                                                                                                                                                                                             |
| 36 |                                       |                                                                                                                                                                                                |                                                                                                                                                                          |                                                                                                                                                                                                                             |
| 37 |                                       |                                                                                                                                                                                                |                                                                                                                                                                          |                                                                                                                                                                                                                             |
| 38 |                                       |                                                                                                                                                                                                |                                                                                                                                                                          |                                                                                                                                                                                                                             |
| 39 | Atroshi et al. 2011                   | Analysis of the Skane Health Care                                                                                                                                                              | Physician diagnosed                                                                                                                                                      | [20]                                                                                                                                                                                                                        |
| 40 |                                       |                                                                                                                                                                                                |                                                                                                                                                                          |                                                                                                                                                                                                                             |
| 41 |                                       |                                                                                                                                                                                                |                                                                                                                                                                          |                                                                                                                                                                                                                             |
| 42 |                                       |                                                                                                                                                                                                |                                                                                                                                                                          |                                                                                                                                                                                                                             |
| 43 |                                       |                                                                                                                                                                                                |                                                                                                                                                                          |                                                                                                                                                                                                                             |
| 44 |                                       |                                                                                                                                                                                                |                                                                                                                                                                          |                                                                                                                                                                                                                             |
| 45 |                                       |                                                                                                                                                                                                |                                                                                                                                                                          |                                                                                                                                                                                                                             |
| 46 |                                       |                                                                                                                                                                                                |                                                                                                                                                                          |                                                                                                                                                                                                                             |
| 47 |                                       |                                                                                                                                                                                                |                                                                                                                                                                          |                                                                                                                                                                                                                             |

|    |                      |                                        |                                            |
|----|----------------------|----------------------------------------|--------------------------------------------|
| 1  |                      |                                        |                                            |
| 2  |                      |                                        |                                            |
| 3  |                      |                                        |                                            |
| 4  |                      |                                        |                                            |
| 5  |                      | Register (SCHR) (inhabitants           |                                            |
| 6  |                      | presenting to public health            |                                            |
| 7  |                      | providers), incident cases identified  |                                            |
| 8  |                      | between 2006 - 2008                    |                                            |
| 9  | Jenkins et al. 2012b | Prospective audit of patients          | Symptoms of pain or paraesthesia in        |
| 10 |                      | referred to a regional hand service    | the median nerve distribution and one      |
| 11 |                      | based in secondary care in Scotland    | or more of: nerve conduction deficit,      |
| 12 |                      | between November 2004 and May          | thenar muscle wasting or positive Tinel    |
| 13 |                      | 2010                                   | or Phalen signs                            |
| 14 |                      |                                        | Mean age of presentation 55.1years         |
| 15 |                      |                                        | (range 22 to 96, SD 13.5 years).           |
| 16 |                      |                                        | Mean body mass index at presentation       |
| 17 |                      |                                        | 29.5 kg/m <sup>2</sup>                     |
| 18 |                      |                                        | CTS more common in: females (OR 1.9,       |
| 19 |                      |                                        | 95% CI 1.5 to 2.5)                         |
| 20 |                      |                                        | Incidence varied significantly between     |
| 21 |                      |                                        | deprivation groups: most deprived          |
| 22 |                      |                                        | 81/100,000 and least deprived              |
| 23 |                      |                                        | 62/100,000 (OR 1.3, 95% CI 1.1 to 1.6)     |
| 24 |                      |                                        | [21]                                       |
| 25 | Jenkins et al. 2013  | Prospective audit of patients referred | Clinical diagnosis based on history        |
| 26 |                      | to a regional hand service based in    | and examination, in most cases             |
| 27 |                      | secondary care in Scotland between     | substantiated by nerve conduction          |
| 28 |                      | November 2004 and May 2010, who        | studies                                    |
| 29 |                      | were employed                          |                                            |
| 30 |                      |                                        | The greatest incidence as in caring and    |
| 31 |                      |                                        | leisure occupations (197 per 100,000)      |
| 32 |                      |                                        | and the lowest incidence was in the        |
| 33 |                      |                                        | associate professional group (37 per       |
| 34 |                      |                                        | 100,000) [22]                              |
| 35 | Dale 2013            | Pooled analysis of six prospective     | A pooled case definition was derived       |
| 36 |                      | studies collecting data from >50       | to include clinical and electrodiagnostic  |
| 37 |                      | workplaces, over variable time         | criteria                                   |
| 38 |                      | frames                                 |                                            |
| 39 |                      |                                        | 7.8% of 4321 subjects studied had          |
| 40 |                      |                                        | prevalent CTS, with an additional 204      |
| 41 |                      |                                        | subjects meeting the CTS criteria, leading |
| 42 |                      |                                        | to an incidence of 2.3 cases per 100       |
| 43 |                      |                                        | person years [47]                          |
| 44 |                      |                                        |                                            |
| 45 |                      |                                        |                                            |
| 46 |                      |                                        |                                            |
| 47 |                      |                                        |                                            |



1  
2  
3  
4  
5  
6  
7  
8  
9  
10  
11  
12  
13  
14  
15  
16  
17  
18  
19  
20  
21  
22  
23  
24  
25  
26  
27  
28  
29  
30  
31  
32  
33  
34  
35  
36  
37  
38  
39  
40  
41  
42  
43  
44  
45  
46  
47

Suppl. Table 5 summary of reported prevalence and incidence by gender

| Study Identifier                        | Country of Origin<br>Data collection<br>(Prevalence or<br>Incidence) | Prevalence or<br>Incidence per<br>100,000, per annum |        |      | Female / male ratio |
|-----------------------------------------|----------------------------------------------------------------------|------------------------------------------------------|--------|------|---------------------|
|                                         |                                                                      | All                                                  | Female | Male |                     |
| De Krom et al. 1992                     | The Netherlands<br>1983 - July 1985<br>(Prevalence)                  | 5700                                                 | 5800   | 600  | 9.66                |
| Atroschi et al. 2000                    | Sweden<br>1997<br>(Prevalence)                                       | 3800                                                 | 4600   | 2800 | 1.64                |
| Papanicolaou,<br>McCable & Firrell 2001 | United States<br>2001<br>(Prevalence)                                | 3720                                                 |        |      | 4.8                 |
| Ferry et al. 1998                       | United Kingdom<br>Not stated<br>(Incidence)                          | 8200                                                 | 6400   | 8200 | 0.78                |
| Nordstrom et al. 1998                   | United States<br>1991 - 1993<br>(Incidence)                          | 346                                                  | 373    | 318  | 1.17                |
| Mondelli, Giannini &<br>Giacchi 2002    | Italy<br>1991 – 1998 (mean)<br>(Incidence)                           | 276                                                  | 506    | 139  | 3.64                |
| Bland, Rudolfer 2003                    | Kent, UK<br>1991 - 2001<br>(Incidence)<br>Huddersfield, UK           | 105                                                  | 120.5  | 60   | 2                   |
|                                         |                                                                      |                                                      | 61.5   | 30   | 2                   |

|                                    |                                               |       |       |      |      |
|------------------------------------|-----------------------------------------------|-------|-------|------|------|
| Latinovic, Gulliford & Hughes 2006 | United Kingdom<br>(Incidence)                 |       | 192.8 | 87.8 | 2.23 |
| Bongers et al. 2007                | The Netherlands<br>(Incidence)<br>1987        | 130   | 190   | 60   | 3.17 |
|                                    | 2001                                          | 180   | 280   | 90   | 3.11 |
| Dieleman et al. 2008               | The Netherlands<br>1996 - 2003<br>(Incidence) | 233.1 |       |      |      |
| Gelfman et al. 2009                | United States<br>(Incidence)<br>1981-1985     | 258   | 337   | 177  | 1.90 |
|                                    | 2001-2005                                     | 424   | 542   | 303  | 1.79 |
| Atroshi et al. 2011                | Sweden<br>2006 - 2008<br>(Incidence)          |       | 428   | 182  | 2.35 |
| Jenkins et al. 2012b               | Scotland<br>2004 - 2010<br>(Incidence)        | 72    | 98    | 43   | 2.28 |
| Jenkins et al. 2013                | Scotland<br>2004 - 2010<br>(Incidence)        | 103   |       |      |      |
| Dale 2013                          | United States<br>(Incidence)                  | 2300  |       |      |      |

## STROBE Statement—checklist of items that should be included in reports of observational studies

|                              | Item No | Recommendation                                                                                                                                                                                                                                                                                                                                                                                                                                                         | Page |
|------------------------------|---------|------------------------------------------------------------------------------------------------------------------------------------------------------------------------------------------------------------------------------------------------------------------------------------------------------------------------------------------------------------------------------------------------------------------------------------------------------------------------|------|
| <b>Title and abstract</b>    | 1       | (a) Indicate the study's design with a commonly used term in the title or the abstract                                                                                                                                                                                                                                                                                                                                                                                 | 1-2  |
|                              |         | (b) Provide in the abstract an informative and balanced summary of what was done and what was found                                                                                                                                                                                                                                                                                                                                                                    | 1-2  |
| <b>Introduction</b>          |         |                                                                                                                                                                                                                                                                                                                                                                                                                                                                        |      |
| Background/rationale         | 2       | Explain the scientific background and rationale for the investigation being reported                                                                                                                                                                                                                                                                                                                                                                                   | 4    |
| Objectives                   | 3       | State specific objectives, including any prespecified hypotheses                                                                                                                                                                                                                                                                                                                                                                                                       | 4-5  |
| <b>Methods</b>               |         |                                                                                                                                                                                                                                                                                                                                                                                                                                                                        |      |
| Study design                 | 4       | Present key elements of study design early in the paper                                                                                                                                                                                                                                                                                                                                                                                                                | 5    |
| Setting                      | 5       | Describe the setting, locations, and relevant dates, including periods of recruitment, exposure, follow-up, and data collection                                                                                                                                                                                                                                                                                                                                        | 5-6  |
| Participants                 | 6       | (a) <i>Cohort study</i> —Give the eligibility criteria, and the sources and methods of selection of participants. Describe methods of follow-up<br><i>Case-control study</i> —Give the eligibility criteria, and the sources and methods of case ascertainment and control selection. Give the rationale for the choice of cases and controls<br><i>Cross-sectional study</i> —Give the eligibility criteria, and the sources and methods of selection of participants | 5-6  |
|                              |         | (b) <i>Cohort study</i> —For matched studies, give matching criteria and number of exposed and unexposed<br><i>Case-control study</i> —For matched studies, give matching criteria and the number of controls per case                                                                                                                                                                                                                                                 |      |
| Variables                    | 7       | Clearly define all outcomes, exposures, predictors, potential confounders, and effect modifiers. Give diagnostic criteria, if applicable                                                                                                                                                                                                                                                                                                                               | 5-6  |
| Data sources/<br>measurement | 8*      | For each variable of interest, give sources of data and details of methods of assessment (measurement). Describe comparability of assessment methods if there is more than one group                                                                                                                                                                                                                                                                                   | na   |
| Bias                         | 9       | Describe any efforts to address potential sources of bias                                                                                                                                                                                                                                                                                                                                                                                                              | na   |
| Study size                   | 10      | Explain how the study size was arrived at                                                                                                                                                                                                                                                                                                                                                                                                                              | na   |
| Quantitative variables       | 11      | Explain how quantitative variables were handled in the analyses. If applicable, describe which groupings were chosen and why                                                                                                                                                                                                                                                                                                                                           | 6    |
| Statistical methods          | 12      | (a) Describe all statistical methods, including those used to control for confounding                                                                                                                                                                                                                                                                                                                                                                                  | 6    |
|                              |         | (b) Describe any methods used to examine subgroups and interactions                                                                                                                                                                                                                                                                                                                                                                                                    | na   |
|                              |         | (c) Explain how missing data were addressed                                                                                                                                                                                                                                                                                                                                                                                                                            | na   |
|                              |         | (d) <i>Cohort study</i> —If applicable, explain how loss to follow-up was addressed<br><i>Case-control study</i> —If applicable, explain how matching of cases and controls was addressed<br><i>Cross-sectional study</i> —If applicable, describe analytical methods taking account of sampling strategy                                                                                                                                                              | na   |
|                              |         | (e) Describe any sensitivity analyses                                                                                                                                                                                                                                                                                                                                                                                                                                  |      |

Continued on next page.

## Results

|                   |     |                                                                                                                                                                                                              |              |
|-------------------|-----|--------------------------------------------------------------------------------------------------------------------------------------------------------------------------------------------------------------|--------------|
| Participants      | 13* | (a) Report numbers of individuals at each stage of study—eg numbers potentially eligible, examined for eligibility, confirmed eligible, included in the study, completing follow-up, and analysed            | Na           |
|                   |     | (b) Give reasons for non-participation at each stage                                                                                                                                                         | Na           |
|                   |     | (c) Consider use of a flow diagram                                                                                                                                                                           | Na           |
| -Descriptive data | 14* | (a) Give characteristics of study participants (eg demographic, clinical, social) and information on exposures and potential confounders                                                                     | 6-7          |
|                   |     | (b) Indicate number of participants with missing data for each variable of interest                                                                                                                          | na           |
|                   |     | (c) <i>Cohort study</i> —Summarise follow-up time (eg, average and total amount)                                                                                                                             | na           |
| Outcome data      | 15* | <i>Cohort study</i> —Report numbers of outcome events or summary measures over time                                                                                                                          |              |
|                   |     | <i>Case-control study</i> —Report numbers in each exposure category, or summary measures of exposure                                                                                                         |              |
|                   |     | <i>Cross-sectional study</i> —Report numbers of outcome events or summary measures                                                                                                                           | 6-7          |
| Main results      | 16  | (a) Give unadjusted estimates and, if applicable, confounder-adjusted estimates and their precision (eg, 95% confidence interval). Make clear which confounders were adjusted for and why they were included | 6-7 + tables |
|                   |     | (b) Report category boundaries when continuous variables were categorized                                                                                                                                    | na           |
|                   |     | (c) If relevant, consider translating estimates of relative risk into absolute risk for a meaningful time period                                                                                             | na           |
| Other analyses    | 17  | Report other analyses done—eg analyses of subgroups and interactions, and sensitivity analyses                                                                                                               | na           |

## Discussion

|                  |    |                                                                                                                                                                            |      |
|------------------|----|----------------------------------------------------------------------------------------------------------------------------------------------------------------------------|------|
| Key results      | 18 | Summarise key results with reference to study objectives                                                                                                                   | 8    |
| Limitations      | 19 | Discuss limitations of the study, taking into account sources of potential bias or imprecision. Discuss both direction and magnitude of any potential bias                 | 10   |
| Interpretation   | 20 | Give a cautious overall interpretation of results considering objectives, limitations, multiplicity of analyses, results from similar studies, and other relevant evidence | 8-11 |
| Generalisability | 21 | Discuss the generalisability (external validity) of the study results                                                                                                      | 10   |

## Other information

|         |    |                                                                                                                                                               |    |
|---------|----|---------------------------------------------------------------------------------------------------------------------------------------------------------------|----|
| Funding | 22 | Give the source of funding and the role of the funders for the present study and, if applicable, for the original study on which the present article is based | 11 |
|---------|----|---------------------------------------------------------------------------------------------------------------------------------------------------------------|----|

\*Give information separately for cases and controls in case-control studies and, if applicable, for exposed and unexposed groups in cohort and cross-sectional studies.

**Note:** An Explanation and Elaboration article discusses each checklist item and gives methodological background and published examples of transparent reporting. The STROBE checklist is best used in conjunction with this article (freely available on the Web sites of PLoS Medicine at <http://www.plosmedicine.org/>, Annals of Internal Medicine at <http://www.annals.org/>, and Epidemiology at <http://www.epidem.com/>). Information on the STROBE Initiative is available at [www.strobe-statement.org](http://www.strobe-statement.org).

# BMJ Open

## Trends in the prevalence, incidence and surgical management of carpal tunnel syndrome between 1993 and 2013: an observational analysis of UK primary care records

|                                 |                                                                                                                                                                                                                                                                                                                                                                                                                                                                                                                                                              |
|---------------------------------|--------------------------------------------------------------------------------------------------------------------------------------------------------------------------------------------------------------------------------------------------------------------------------------------------------------------------------------------------------------------------------------------------------------------------------------------------------------------------------------------------------------------------------------------------------------|
| Journal:                        | <i>BMJ Open</i>                                                                                                                                                                                                                                                                                                                                                                                                                                                                                                                                              |
| Manuscript ID                   | bmjopen-2017-020166.R1                                                                                                                                                                                                                                                                                                                                                                                                                                                                                                                                       |
| Article Type:                   | Research                                                                                                                                                                                                                                                                                                                                                                                                                                                                                                                                                     |
| Date Submitted by the Author:   | 02-Feb-2018                                                                                                                                                                                                                                                                                                                                                                                                                                                                                                                                                  |
| Complete List of Authors:       | Burton, Claire; Keele University, Arthritis Research UK Primary Care Centre, Research Institute for Primary Care & Health Sciences<br>Chen, Ying; Keele University, Arthritis Research UK Primary Care Centre, Research Institute for Primary Care & Health Sciences<br>Chesterton, Linda; Keele University, Arthritis Research UK Primary Care Centre, Research Institute for Primary Care & Health Sciences<br>van der Windt, Danielle; Keele University, Arthritis Research UK Primary Care Centre, Research Institute for Primary Care & Health Sciences |
| <b>Primary Subject Heading</b>: | Epidemiology                                                                                                                                                                                                                                                                                                                                                                                                                                                                                                                                                 |
| Secondary Subject Heading:      | Rheumatology, General practice / Family practice                                                                                                                                                                                                                                                                                                                                                                                                                                                                                                             |
| Keywords:                       | PRIMARY CARE, SURGERY, Musculoskeletal disorders < ORTHOPAEDIC & TRAUMA SURGERY, Hand & wrist < ORTHOPAEDIC & TRAUMA SURGERY                                                                                                                                                                                                                                                                                                                                                                                                                                 |
|                                 |                                                                                                                                                                                                                                                                                                                                                                                                                                                                                                                                                              |

SCHOLARONE™  
Manuscripts

only

1  
2  
3 **Trends in the prevalence, incidence and surgical management of carpal tunnel**  
4 **syndrome between 1993 and 2013: an observational analysis of UK primary care**  
5 **records**  
6  
7

8  
9 **Authors**  
10

11 Claire L. Burton<sup>a</sup> [c.burton@keele.ac.uk](mailto:c.burton@keele.ac.uk) GP Research Fellow

12 Ying Chen<sup>a</sup> Research<sup>a</sup> Research Associate in Biostatistics

13 Linda S. Chesterton<sup>a</sup> Senior Lecturer in Physiotherapy

14 Danielle A. van der Windt<sup>a</sup> Professor of Primary Care Epidemiology

15 <sup>a</sup> Arthritis Research UK Primary Care Centre, Research Institute for Primary Care & Health  
16 Sciences, Keele University, Staffordshire, England. ST5 5BG

17 Word count (excluding title page, abstract, references, figures and tables) 4266  
18  
19  
20  
21  
22  
23  
24  
25  
26  
27  
28  
29  
30  
31  
32  
33  
34  
35  
36  
37  
38  
39  
40  
41  
42  
43  
44  
45  
46  
47  
48  
49  
50  
51  
52  
53  
54  
55  
56  
57  
58  
59  
60

## Abstract

### Objectives

To describe the prevalence, incidence and surgical management of carpal tunnel syndrome (CTS), between 1993 and 2013, as recorded in the Clinical Practice Research Datalink (CPRD)

### Design

We completed a series of cross-sectional epidemiological analyses to observe trends over time.

### Setting

Primary care data collected between 1993 and 2013, stored in the Clinical Practice Research Datalink

### Population

Individuals  $\geq 18$  years were selected. Prevalent and incident episodes of Carpal Tunnel syndrome (CTS) and episodes surgical intervention were identified using a list of pre-identified Read codes.

### Analysis

We defined incident episodes as those with no preceding diagnostic code for CTS in the past 2 years of data. Episodes of surgery were expressed as a percentage of the prevalent population during the same calendar year. Joinpoint regression was used to determine significant changes in the underlying trend.

### Results

The prevalence of CTS increased over the study period, with a particular incline between 2000 and 2004 (annual percentage change 7.81). The female to male prevalence ratio reduced over time from 2.74 in 1993 to 1.93 in 2013. The median age of females and males with CTS were noted to increase from 49 and 53 years respectively in 1993 to 54 and 59 years respectively in 2013. Incidence was also noted to increase over time. After an initial increase between 1993 and 2007, the percentage of prevalent patients with a coded surgical episode began to decrease after 2007 to 27.41% in 2013 (annual percentage change -1.7)

### Conclusion

This study has demonstrated that the prevalence and incidence of carpal tunnel syndrome increased over the study period between 1993 and 2013. Rates of surgery for CTS also increased over the study period, however after 2007, the percent of patients receiving surgery showed a statistically significant decline back to the rate seen in 2004.

## Key words

Carpal tunnel syndrome; primary care; epidemiology; incidence; prevalence; surgery

1  
2  
3  
4  
5  
6  
7  
8  
9  
10  
11  
12  
13  
14  
15  
16  
17  
18  
19  
20  
21  
22  
23  
24  
25  
26  
27  
28  
29  
30  
31  
32  
33  
34  
35  
36  
37  
38  
39  
40  
41  
42  
43  
44  
45  
46  
47  
48  
49  
50  
51  
52  
53  
54  
55  
56  
57  
58  
59  
60

**Strengths and Limitations**

- Provides updated epidemiological data about a common and bothersome condition
- Set in primary care, where most cases of carpal tunnel syndrome present
- Utilises a large primary care database, generalizable to the UK population
- Relies on the correct coding and capture of episodes of carpal tunnel syndrome and carpal tunnel release surgery

For peer review only



## INTRODUCTION

Carpal tunnel syndrome (CTS) is a chronic focal compressive neuropathy caused by the entrapment of the median nerve at the level of the carpal tunnel in the wrist.[1] CTS is the most common presentation of the entrapment neuropathies [2] and is characterised by symptoms including paraesthesia, dysesthesia, sensory loss and eventually weakness and atrophy of the thenar muscle. Symptoms are usually localised to the hand but can spread proximally to the forearm, upper arm and even shoulder.[3] Despite causing relatively localised symptoms, CTS can have substantial physical, psychological and economic consequences.[4, 5] In some cases, there may be associations with certain occupations (such as the care and leisure industry)[6] which involve the overuse of the hand and wrist as well as other physical comorbidities including: pregnancy; diabetes; hypothyroidism and obesity.[7]

The diagnosis of CTS is generally accepted to be a clinical one (based on history and examination findings) [8], although electrodiagnostic tests are commonly requested to confirm the diagnosis or differentiate among diagnoses, especially in the presence of thenar atrophy and / or persistent numbness or if surgical management is being considered.[9] The treatment of CTS is usually defined as either surgical or conservative (non-surgical). Local steroid injections and night splinting form the mainstay of primary care interventions in carpal tunnel syndrome, as indicated by national care pathways.[10, 11] Patients with moderate, severe or deteriorating symptoms following conservative treatment or sudden and severe symptoms are recommended to be referred for consideration of surgery.[12] Carpal tunnel release surgery (CTR) is routinely carried out under local anaesthetic as day surgery. Open and endoscopic approaches are used to release the flexor retinaculum.[13] Previous studies have sought to estimate the prevalence and / or incidence of CTS. Such epidemiological studies have been diverse in their approach to the populations studied and case definitions applied.[14] The reported estimates for annual prevalence range from 3720-5700 per 100,000 per year [15-17] and the reported incidence from 72 – 8200 per 100,000 per year.[6, 14, 18-23] CTS is generally accepted to be more common in women; the female to male ratio ranges between 0.78 and 9.66 [14, 15] A number of previous studies have observed the trends of prevalence or incidence over time and identified an increase [19, 20, 24], with 2005 being the latest data collection point. The most recent primary care based study in the UK utilised data from between 1992 and 2000.[18]

Episodes of CTR have also been shown to have increased, with audit data from one major tertiary UK Hand Centre suggesting that referral for CTR increased over a 10 year period from 59.7 to 112 per 100,000 population per year between 1989-9 and 2000-1.[25] Using Hospital Episode Statistics (HES) between 1998 and 2011, Bebbington and Furniss also observed an increase in the absolute number of patients with CTS and episodes of CTR, however they also noted a decrease in the use of surgery post 2008.[26]

Previous studies have used a range of methods to classify episodes of CTS and have been conducted in a number of population settings. CTS is essentially a clinical diagnosis, and in the UK, the majority of patients will first present to and be managed within primary care. Only a proportion of these patients will be referred into more specialised services and since not all surgical episodes will take place in secondary care (hospitals), as community clinics are now receiving referrals, primary care records should capture the majority of episodes. Data from a high quality source, representative of the UK population is necessary to support the planning and commissioning of services.

The aim of this study is therefore to provide updated estimates of the prevalence, incidence and surgical management of carpal tunnel syndrome and describe trends over a 20 year period, using data from a large national primary care database (Clinical Practice Research Datalink (CPRD)).

## METHODS

This was an observational study using the Clinical Practice Research Datalink (CPRD) to estimate the prevalence, incidence and surgical management of CTS from 1993 to 2013. CPRD is a live, primary care database of anonymised medical records from general practices. It holds information of over 11.3 million patients from 674 practices in the UK since 1987. 4.4 million active (alive and currently registered) patients are currently contributing information to the datalink, which equates to 6.9% of the UK population. [27] CPRD is broadly representative of the UK general population in terms of age, gender and ethnicity. [27] The CPRD has National Research Ethics Committee (NRES) approval for observational research using primary care data and as such no further permissions were required. The Independent Scientific Advisory Committee (ISAC) study protocol 14\_167 was approved in September 2014. Patients were not directly involved in the design of this study, however the results will be used to inform discussions regarding further research in this field with our local Research User Group.

During clinical interactions, Read Codes are used to record signs and symptoms, treatments and therapies, investigations, occupations, diagnoses and appliances. Read codes make up a hierarchical 'thesaurus' stored by the computer. Clinical information is hence stored in a retrievable and analysable format.[28]

The study population consisted of men and women over 18 years of age. Patients were required to have 'up to standard' (which is measured at the level of the general practice) and 'acceptable patient' (which is measured at the level of the patient) data in CPRD, for two years prior to an incident episode and at the point of diagnosis for a prevalent episode. These terms are defined by CPRD. The 'up to standard' metric is based on the continuity of recorded data, including the recording of deaths, and is set at the most recent date at which practices met the quality criteria. The 'acceptable patient' metric is based on the presence of a registration status, the patient record itself and there being a valid age and gender.[27]

Prevalent and incident patients were identified by a consultation recorded using one of the Read codes listed in Table 1. Some treatment codes and in the case of injections, linked prescription data, were included as evidence of diagnosis as per previous studies.[18] Pilot work using a local primary care database (Consultations in Primary Care Archive, CiPCA [29]) had noted that 30% of CTS cases with a treatment code (i.e. CTR or a coded carpal tunnel injection) had not initially received a diagnosis code. This means that at presentation, patients may have been attributed a more generic term such as 'hand pain' and later gone on to receive condition specific treatment. Hence, treatment codes were used to capture such cases, which would be missed when using diagnostic codes only.

Table 1 Readcodes used to define a prevalent or incident episode of carpal tunnel syndrome

| Term                             | Read code |
|----------------------------------|-----------|
| Carpal tunnel syndrome           | F340      |
| Injection of carpal tunnel       | 85BE.00   |
| Carpal tunnel release            | 70560     |
| Endoscopic carpal tunnel release | 7056011   |
| Carpal tunnel decompression      | 70564     |

The prevalence of individuals consulting with CTS was calculated per annum. The numerator for prevalence was the number of patients with a record of a CTS diagnosis or evidence of an episode of CTR or a carpal tunnel injection (CTI), in each calendar year. In order to determine annual incidence, the numerator was the number of patients with a record of CTS or evidence of CTR or CTI, without a prior record of these codes during a run-in-period of two years. This two year run-in period was based on expert consensus with the aim of estimating the period of time during which a new episode of CTS may develop. It was felt unlikely that a patient with ongoing bothersome symptoms would not have presented in primary care within this 2 year period. This however is an assumption made in order to define incident cases in this data set. It remains possible that patients had CTS in the community and did not present, presented in an alternative setting or indeed had a misdiagnosis / uncoded diagnosis made. CTS could present as a new episode in the contralateral wrist sometime after the initial presentation, hence it was not felt possible to define this criterion as 'no previous recorded episode'. All incidence patients were therefore required to have complete registration for this 2 calendar years prior to the event date. Pilot work in CiPCA had shown that over 9 years observed, 4% of potential incident cases were lost due to the lack of 2 years registration data required to define an incident episode.

The denominator population for calculation of prevalence was the total up-to-standard person-years contributed to CPRD by patients over the age of 18 years, for each annual period between 1993 and 2013. In order to apply the same criteria to both the numerator and denominator populations, the denominator populations for calculating incidence were also required to have registration at the mid-point of the year, two calendar years before the index year.

Episodes of carpal tunnel release (CTR) were identified using Read codes as shown in Table 2. In addition, codes used to define 're-release of carpal tunnel' and 'revision of carpal tunnel release' were included as a surgical episode (if first recorded). These terms were not included in the definition of CTS for the estimation of prevalence and incidence as they may not have indicated an episode of 'idiopathic' CTS but rather iatrogenic symptoms following previous (unsuccessful) surgery. Of note revision codes contributed 1.00% of the total surgical codes used. Results were expressed as the percentage of patients with a prevalent episode of CTS having a code of CTR in the same calendar year. Percentages were calculated based on the number of prevalent cases as opposed to incident cases as it was felt likely that patients would receive surgery in the annual period following their index consultation.

Table 2 Read codes used to define a surgical episode

| Term                              | Read code |
|-----------------------------------|-----------|
| Carpal tunnel release             | 817       |
| Re-release of carpal tunnel       | 16896     |
| Endoscopic carpal tunnel release  | 39335     |
| Revision of carpal tunnel release | 97195     |
| Carpal tunnel decompression       | 19249     |

## Statistical methods

Age and sex specific annual prevalence and incidence were determined for each calendar year, between 1993 and 2013 and presented as n / 10,000 person years. For confidence interval calculation a Poisson distribution was used. As a sensitivity analysis, age and sex standardised annual figures of CTS prevalence and incidence for each year were also calculated, using population estimates provided by the website of the Office of National

1  
2  
3 Statistics.[30] Un-standardised and standardised rates were very similar, hence we report  
4 un-standardised rates as the primary outcome. The age and sex standardised estimates of  
5 the annual prevalence and incidence of CTS are shown in Supplementary Table 1.  
6

7 Episodes of CTR were identified and the frequency in each calendar year expressed as a  
8 percentage of the prevalent population for the same time period. Emerging trends were  
9 described. Joinpoint regression was used to determine mean Annual Percentage Change  
10 (APC) and assess when significant changes ('joinpoints') occurred in the underlying trend for  
11 incidence, prevalence, and surgery. This method assists the exploration of the potential  
12 influence of changes in practice, although such potential associations cannot be proven.[31,  
13 32] Models were fitted using the JOINPOINT REGRESSION PROGRAM (version 4.3.1.0)  
14 and the best fitting model chosen (up to 5 joinpoints).  
15

## 16 RESULTS

### 17 Trends in prevalence

18  
19 Table 3 presents the prevalence (crude estimates) of patients presenting in primary care  
20 with carpal tunnel syndrome between 1993 and 2013 and the demographics of the  
21 population. The denominator population for prevalence increased from 1,117,433 person  
22 years in 1993 to 3,473,094 person years in 2013. The total prevalence in 1993 was 26.03  
23 per 10,000 person years (95% CI 25.10 – 27.00), and for 2013, 36.08 per 10,000 person  
24 years (95% CI 35.45 – 36.72). As shown in Figure 1 and corresponding Table 4, prevalence  
25 appeared to decrease between 1993 and 2000 (annual percentage change APC = -0.8%,  
26 95% confidence interval -2.6 to 1.0). It then increased between 2000 and 2004 (APC =  
27 7.8%, 95% CI 3.1 – 12.7) and then increased at a slower rate between 2004 and 2013 (APC =  
28 1.1%, 95% CI 0.4 – 1.8). The female to male ratio reduced over time from 2.74 in 1993 to  
29 1.93 in 2013. The median age of female and male patients with CTS increased from 49 and  
30 53 years respectively in 1993 to 54 and 59 years respectively in 2013 (see Supplementary  
31 Table 2). Supplementary Table 3 and supplementary Figures 1 and 2 further illustrate the  
32 crude prevalence of CTS over time by age and gender. The prevalence of CTS appears to  
33 increase with age in the male population, whereas the prevalence in women peaks in the 50  
34 – 59 age group.  
35  
36  
37  
38  
39  
40  
41  
42  
43  
44  
45  
46  
47  
48  
49  
50  
51  
52  
53  
54  
55  
56  
57  
58  
59  
60

Table 3 Crude prevalence of carpal tunnel syndrome (n/10,000 person years) per calendar year, as presented in UK primary care (CPRD)

| Year | Number of person years | Prevalent individuals | Total crude prevalence per 10,000 person years, (95% confidence interval) | Female prevalence per 10,000 person years, (95% confidence interval) | Male prevalence per 10,000 person years, (95% confidence interval) | Female: male |
|------|------------------------|-----------------------|---------------------------------------------------------------------------|----------------------------------------------------------------------|--------------------------------------------------------------------|--------------|
| 1993 | 1117443                | 2909                  | 26.03 (25.10 – 27.00)                                                     | 37.52 (35.96 – 39.13)                                                | 13.69 (12.72 – 14.71)                                              | 2.74         |
| 1994 | 1198256                | 3188                  | 26.61 (25.69 – 27.55)                                                     | 37.23 (35.73 – 38.79)                                                | 15.21 (14.23 – 16.25)                                              | 2.45         |
| 1995 | 1286800                | 3343                  | 25.98 (25.11 – 26.88)                                                     | 36.64 (35.20 – 38.12)                                                | 14.58 (13.65 – 15.56)                                              | 2.51         |
| 1996 | 1437567                | 3706                  | 25.78 (24.96 – 26.62)                                                     | 36.75 (35.38 – 38.16)                                                | 14.09 (13.23 – 15.00)                                              | 2.61         |
| 1997 | 1681756                | 4190                  | 24.91 (24.17 – 25.68)                                                     | 34.87 (33.64 – 36.14)                                                | 14.34 (13.53 – 15.18)                                              | 2.43         |
| 1998 | 1899393                | 4884                  | 25.71 (25.00 – 26.45)                                                     | 36.57 (35.38 – 37.79)                                                | 14.22 (13.46 – 15.01)                                              | 2.57         |
| 1999 | 2289158                | 5696                  | 24.88 (24.24 – 25.54)                                                     | 35.21 (34.14 – 36.30)                                                | 14.01 (13.32 – 14.72)                                              | 2.52         |
| 2000 | 2787457                | 6998                  | 25.11 (24.52 – 25.70)                                                     | 34.82 (33.86 – 35.81)                                                | 14.90 (14.26 – 15.57)                                              | 2.34         |
| 2001 | 3057458                | 8137                  | 26.61 (26.04 – 27.20)                                                     | 36.46 (35.52 – 37.42)                                                | 16.31 (15.67 – 16.98)                                              | 2.23         |
| 2002 | 3385511                | 9722                  | 28.72 (28.15 – 29.29)                                                     | 39.33 (38.40 – 40.28)                                                | 17.64 (17.00 – 18.29)                                              | 2.23         |
| 2003 | 3552908                | 11124                 | 31.31 (30.73 – 31.90)                                                     | 43.61 (42.66 – 44.59)                                                | 18.53 (17.90 – 19.18)                                              | 2.35         |
| 2004 | 3712172                | 12622                 | 34.00 (33.41 – 34.60)                                                     | 47.20 (46.23 – 48.19)                                                | 20.33 (19.68 – 20.99)                                              | 2.32         |
| 2005 | 3808183                | 12741                 | 33.46 (32.88 – 34.04)                                                     | 46.37 (45.42 – 47.34)                                                | 20.09 (19.45 – 20.74)                                              | 2.31         |
| 2006 | 3857487                | 12718                 | 32.97 (32.40 – 33.55)                                                     | 45.82 (44.88 – 46.78)                                                | 19.69 (19.07 – 20.33)                                              | 2.33         |
| 2007 | 3904068                | 13222                 | 33.87 (33.29 – 34.45)                                                     | 46.35 (45.41 – 47.31)                                                | 20.99 (20.35 – 21.65)                                              | 2.21         |
| 2008 | 3897624                | 14030                 | 36.00 (35.40 – 36.60)                                                     | 49.12 (48.15 – 50.11)                                                | 22.46 (21.79 – 23.14)                                              | 2.19         |
| 2009 | 3894989                | 14500                 | 37.23 (36.60 – 37.81)                                                     | 50.68 (49.69 – 51.68)                                                | 23.35 (22.68 – 24.05)                                              | 2.17         |
| 2010 | 3842773                | 14166                 | 36.86 (36.26 – 37.48)                                                     | 49.75 (48.76 – 50.75)                                                | 23.57 (22.88 – 24.27)                                              | 2.11         |
| 2011 | 3769676                | 13529                 | 35.89 (35.29 – 36.50)                                                     | 47.98 (47.00 – 48.97)                                                | 23.36 (22.67 – 24.07)                                              | 2.05         |
| 2012 | 3714877                | 13388                 | 36.04 (35.43 – 36.66)                                                     | 47.57 (46.59 – 48.56)                                                | 24.05 (23.35 – 24.78)                                              | 1.98         |
| 2013 | 3473094                | 12532                 | 36.08 (35.45 – 36.72)                                                     | 47.19 (46.18 – 48.21)                                                | 24.49 (23.75 – 25.25)                                              | 1.93         |

Table 4 Joinpoint analysis of crude prevalence

| Segment | Lower Endpoint | Upper Endpoint | Annual percentage change | Lower 95th confidence interval | Upper 95 <sup>th</sup> confidence interval | Test Statistic (t) | Prob >  t |
|---------|----------------|----------------|--------------------------|--------------------------------|--------------------------------------------|--------------------|-----------|
| 1       | 1993           | 2000           | -0.8                     | -2.6                           | 1.0                                        | -1.0               | 0.3       |
| 2       | 2000           | 2004           | 7.8 <sup>^</sup>         | 3.1                            | 12.7                                       | 3.7                | 0.0       |
| 3       | 2004           | 2013           | 1.1 <sup>^</sup>         | 0.4                            | 1.8                                        | 3.4                | 0.0       |

### Trends in incidence

Table 5 presents the annual incidence (crude estimates) for patients presenting in UK primary care with carpal tunnel syndrome between 1993 and 2013 and the demographics of the population. The denominator population for incidence, which is dependent on patients having 2 years up to standard data prior to the midpoint of the year in question, increased from 783,330 person years in 1993 to 3,015,670 person years in 2013. The crude incidence in 1993 was 20.22 per 10,000 person years (95% CI 19.24 - 21.24)), and for 2013, 27.68 per 10,000 person years (95% CI 27.09 – 28.28). As shown in Figure 2 and table 6, the results of the best fitting Joinpoint regression suggest the incidence increased between 1993 and 2000 (APC = 0.3, 95% CI -2.3 – 2.9). It then increased more quickly between 2000 and 2004 (APC = 6.9, 95% CI 0.5 – 13.7), before slowing between 2004 and 2013 (APC = 0.7, 95% CI -0.2 – 1.6). The female to male ratio reduced over time from 2.57 in 1993 to 1.88 in 2013. The median age of female and male patients were noted to increase from 50 and 51 years respectively in 1993 to 55 and 59 years respectively in 2013 (see Supplementary Table 4). Supplementary Table 5 and supplementary Figures 3 and 4 further illustrate the incidence of CTS over time by age and gender.

Table 5 Crude incidence of carpal tunnel syndrome (n/10,000 person years) per calendar year, as presented in UK primary care (CPRD)

| Year | Number of person years | Incident individuals | Total crude incidence per 10,000 person years, (95% confidence interval) | Female incidence per 10,000 person years, (95% confidence interval) | Male incidence per 10,000 person years, (95% confidence interval) | Female: male |
|------|------------------------|----------------------|--------------------------------------------------------------------------|---------------------------------------------------------------------|-------------------------------------------------------------------|--------------|
| 1993 | 783330                 | 1584                 | 20.22 (19.24 – 21.24)                                                    | 28.72 (27.09 – 30.42)                                               | 11.17 (10.14 – 12.29)                                             | 2.57         |
| 1994 | 868616                 | 1797                 | 20.69 (19.74 – 21.67)                                                    | 28.52 (26.97 – 30.13)                                               | 12.38 (11.34 – 13.69)                                             | 2.30         |
| 1995 | 1003593                | 1963                 | 19.56 (18.70 – 20.45)                                                    | 27.53 (26.12 – 29.00)                                               | 11.12 (10.20 – 12.10)                                             | 2.48         |
| 1996 | 1065068                | 2142                 | 20.11 (19.27 – 20.98)                                                    | 28.39 (27.00 – 29.84)                                               | 11.37 (10.47 – 12.33)                                             | 2.50         |
| 1997 | 1150299                | 2306                 | 20.05 (19.24 – 20.88)                                                    | 28.39 (27.05 – 29.79)                                               | 11.25 (10.39 – 12.16)                                             | 2.52         |
| 1998 | 1300074                | 2696                 | 20.74 (19.95 – 21.52)                                                    | 29.65 (28.57 – 31.22)                                               | 11.37 (10.56 – 12.23)                                             | 2.61         |
| 1999 | 1497673                | 3030                 | 20.23 (19.52 – 20.10)                                                    | 28.53 (27.35 – 29.75)                                               | 11.54 (10.77 – 12.34)                                             | 2.47         |
| 2000 | 1682027                | 3462                 | 20.58 (19.90 – 21.28)                                                    | 28.66 (27.54 – 29.81)                                               | 12.15 (11.41 – 12.93)                                             | 2.36         |
| 2001 | 2019596                | 4391                 | 21.74 (21.10 – 22.40)                                                    | 29.72 (28.68 – 30.79)                                               | 13.46 (12.74 – 14.20)                                             | 2.21         |
| 2002 | 2456761                | 5718                 | 23.27 (22.68 – 31.78)                                                    | 31.78 (30.78 – 32.79)                                               | 14.47 (13.80 – 15.17)                                             | 2.20         |
| 2003 | 2669111                | 6772                 | 25.37 (24.77 – 25.98)                                                    | 35.13 (34.14 – 36.14)                                               | 15.33 (14.67 – 16.02)                                             | 2.29         |
| 2004 | 2779821                | 7868                 | 28.30 (27.68 – 28.94)                                                    | 39.22 (38.19 – 40.27)                                               | 17.10 (16.42 – 17.81)                                             | 2.29         |
| 2005 | 3164506                | 8113                 | 25.64 (25.08 – 26.20)                                                    | 35.55 (34.63 – 36.48)                                               | 15.49 (14.88 – 16.12)                                             | 2.30         |
| 2006 | 3307051                | 8337                 | 25.21 (24.67 – 25.76)                                                    | 34.91 (34.02 – 35.82)                                               | 15.27 (14.68 – 15.89)                                             | 2.29         |
| 2007 | 3343009                | 8865                 | 26.52 (25.97 – 27.08)                                                    | 35.76 (34.86 – 36.67)                                               | 17.07 (16.45 – 17.71)                                             | 2.09         |
| 2008 | 3341299                | 9437                 | 28.24 (27.68 – 28.82)                                                    | 38.23 (37.30 – 39.17)                                               | 18.06 (17.42 – 18.72)                                             | 2.12         |
| 2009 | 3383196                | 9918                 | 29.32 (28.74 – 29.90)                                                    | 39.73 (38.79 – 50.68)                                               | 18.69 (18.04 – 19.36)                                             | 2.13         |
| 2010 | 3357338                | 9634                 | 28.70 (28.13 – 29.27)                                                    | 38.70 (37.77 – 39.64)                                               | 18.46 (17.82 – 19.13)                                             | 2.10         |
| 2011 | 3269296                | 9083                 | 27.78 (27.21 – 28.36)                                                    | 37.11 (36.19 – 38.05)                                               | 18.20 (17.54 – 18.87)                                             | 2.04         |
| 2012 | 3222880                | 9011                 | 27.96 (27.39 – 28.54)                                                    | 36.44 (35.52 – 37.88)                                               | 19.23 (18.56 – 19.93)                                             | 1.89         |
| 2013 | 3015670                | 8346                 | 27.68 (27.09 – 28.28)                                                    | 35.95 (35.01 – 36.92)                                               | 19.12 (18.43 – 19.84)                                             | 1.88         |

Table 6 Joinpoint analysis of crude incidence

| Segment | Lower Endpoint | Upper Endpoint | Annual percentage change | Lower 95th confidence interval | Upper 95 <sup>th</sup> confidence interval | Test Statistic (t) | Prob >  t |
|---------|----------------|----------------|--------------------------|--------------------------------|--------------------------------------------|--------------------|-----------|
| 1       | 1993           | 2000           | 0.3                      | -2.3                           | 2.9                                        | 0.2                | 0.8       |
| 2       | 2000           | 2004           | 6.9 <sup>^</sup>         | 0.5                            | 13.7                                       | 2.3                | 0.0       |
| 3       | 2004           | 2013           | 0.7                      | -0.2                           | 1.6                                        | 1.7                | 0.1       |

### Trends in the percentage of patients with carpal tunnel syndrome referred and receiving surgical management

Table 7 presents the percentage of prevalent patients with a recorded episode of CTR in each calendar year between 1993 and 2013 and the demographics of this sample. The percentage of all patients with a recorded episode of CTR in 1993 was 19.35%, and for 2013, 27.41%. As shown in Figure 3 and corresponding Table 8 the percentage of patients with a coded episode of CTR increased between 1993 - 2007 (annual percentage change APC = 2.6, 95% CI 1.9 – 3.2). It then appeared to decrease between 2007 and 2013 (APC = -1.7, 95% CI -3.3 - -0.3). The median age of females and males receiving CTR were noted to increase from 53 and 55 years respectively in 1993 to 57 and 62 years respectively in 2013.

Table 7 Percentage of patients with carpal tunnel syndrome with a recorded episode of carpal tunnel release surgery per calendar year, as presented in UK primary care (CPRD)

| Year | Episodes per 10,000 person years | % prevalent individuals having surgery | % prevalent females having surgery | % prevalent males having surgery | Female median age (25% - 75% Interquartile range) | Male median age (25% - 75% Interquartile range) |
|------|----------------------------------|----------------------------------------|------------------------------------|----------------------------------|---------------------------------------------------|-------------------------------------------------|
| 1993 | 5.04                             | 19.35                                  | 18.78                              | 21.03                            | 53 (43 – 64)                                      | 55 (44 – 69)                                    |
| 1994 | 5.70                             | 21.42                                  | 20.62                              | 23.52                            | 53 (43 – 68)                                      | 58 (45 – 70)                                    |
| 1995 | 6.19                             | 23.81                                  | 23.40                              | 24.92                            | 53 (42 – 67)                                      | 55 (44 – 70)                                    |
| 1996 | 5.41                             | 20.99                                  | 20.48                              | 22.43                            | 53 (44 – 65)                                      | 52 (40 – 65)                                    |
| 1997 | 5.70                             | 22.89                                  | 22.14                              | 24.81                            | 53 (45 – 67)                                      | 56 (42 – 69)                                    |
| 1998 | 5.73                             | 22.28                                  | 21.28                              | 25.00                            | 53 (44 – 65)                                      | 53 (44 – 65)                                    |
| 1999 | 6.24                             | 25.09                                  | 24.60                              | 26.38                            | 54 (44 – 67)                                      | 56 (46 – 70)                                    |
| 2000 | 6.41                             | 25.54                                  | 24.84                              | 27.23                            | 54 (44 – 68)                                      | 56 (45 – 69)                                    |
| 2001 | 6.88                             | 25.87                                  | 25.95                              | 25.68                            | 55 (45 – 68)                                      | 58 (46 – 71)                                    |
| 2002 | 7.02                             | 24.46                                  | 24.19                              | 25.09                            | 57 (46 – 71)                                      | 55 (45 – 68)                                    |
| 2003 | 8.26                             | 26.39                                  | 25.88                              | 27.66                            | 56 (45 – 67)                                      | 57 (46 – 71)                                    |
| 2004 | 9.34                             | 27.48                                  | 27.38                              | 27.74                            | 56 (46 – 67)                                      | 57 (47 – 68)                                    |
| 2005 | 9.70                             | 29.00                                  | 28.31                              | 30.65                            | 57 (47 – 68)                                      | 58 (46 – 71)                                    |
| 2006 | 9.36                             | 28.40                                  | 28.31                              | 28.61                            | 57 (47 – 68)                                      | 60 (48 – 72)                                    |
| 2007 | 9.71                             | 28.66                                  | 28.26                              | 29.59                            | 56 (46 – 69)                                      | 59 (48 – 71)                                    |
| 2008 | 10.53                            | 29.25                                  | 29.00                              | 29.82                            | 56 (46 – 68)                                      | 60 (49 – 72)                                    |
| 2009 | 10.92                            | 29.32                                  | 28.73                              | 30.66                            | 56 (46 – 70)                                      | 61 (49 – 72)                                    |
| 2010 | 10.40                            | 28.22                                  | 27.57                              | 29.62                            | 57 (47 – 71)                                      | 61 (48 – 73)                                    |
| 2011 | 9.47                             | 26.37                                  | 26.11                              | 26.93                            | 57 (47 – 70)                                      | 61 (49 – 73)                                    |
| 2012 | 9.48                             | 26.31                                  | 25.89                              | 27.19                            | 57 (47 – 71)                                      | 60 (49 – 73)                                    |
| 2013 | 9.89                             | 27.41                                  | 26.47                              | 29.30                            | 57 (48 – 70)                                      | 62 (51 – 74)                                    |



Table 8 Joinpoint

| Segment | Lower Endpoint | Upper Endpoint | Annual percentage change | Lower 95th confidence interval | Upper 95 <sup>th</sup> confidence interval | Test Statistic (t) | Prob >  t |
|---------|----------------|----------------|--------------------------|--------------------------------|--------------------------------------------|--------------------|-----------|
| 1       | 1993           | 2007           | 2.6 <sup>^</sup>         | 1.9                            | 3.2                                        | 8.2                | 0.0       |
| 2       | 2007           | 2013           | -1.7 <sup>^</sup>        | -3.1                           | -0.3                                       | -2.6               | 0.0       |

## DISCUSSION

Whilst the prevalence and incidence of CTS have increased over the study period 1993-2013, results show that episodes of surgery, increased until 2007 and declined thereafter.

Supplementary Tables 6 and 7 summarise estimates of the prevalence, incidence and sex ratios of CTS from a previous scoping review of literature pertaining to the general population, demonstrating the substantial variation in results between studies, which may partly be the results of differences in definition of CTS applied and population observed. Studies which also utilised primary care data showed a similar estimate of the incidence of CTS in a UK primary care population [18] and similarly reported an increase in incidence over time, albeit in a Dutch primary care population.[21] As described in previous studies, CTS shows a peak in prevalence and incidence in women of middle age (50-59 group, likely due to hormonal changes around the time of the menopause)[18], whilst in the male population, the prevalence and incidence of CTS increased with age. Gelfman et al also commented that an increasing number of older people presenting with CTS had been noted over the course of their study.[20] The increase in the prevalence and incidence of CTS in the older aged male groups, may partially account for the observed decrease in the female to male ratio, over time.

The variability in the case definition of carpal tunnel syndrome was highlighted by Descatha et al 2011 who identified seven case definitions of CTS proposed for use in population based studies. Definitions included variations of: symptoms only; symptoms and examination findings; symptoms and either physical examination or electrodiagnostic results and symptoms and electrodiagnostic results. This study showed a range in the population prevalence of CTS from 2.5% to 11%, with studies using less specific case definitions yielding higher prevalence rates.[33] Misclassification ranged between 1 and 10%. The prevalence of CTS in any given population is likely therefore to depend on the definition of CTS applied. The case definition in our study is derived from GP recorded diagnosis and treatment codes, which may have been based on clinical findings alone; those who have had further investigations and those who have received definitive condition specific treatment. Hence it utilises a pragmatic approach, across a large population that will include all patients presenting to their GP with symptoms. Our study methods do however assume that patients with symptoms will be presenting in primary care or be receiving definitive coded treatment. The study will not capture patients with chronic symptoms who are not presenting in primary care or who had a coded episode of surgery or injection.

Although Joinpoint analysis does not provide evidence for the cause of a change in observed outcomes, it highlights when a significant change in trend has taken place. Our results suggest that the annual percentage change in prevalence and incidence was highest between 2000 and 2004. A possible reason for this may be the publication of the UK Government's information technology strategy for the NHS in 1998,[34] which proposed that by 2005, the person-based electronic health record (HER), would have been fully implemented.[35] Although no direct evidence for this was found, it may be possible that with the increasing use of IT systems in primary care and attention to providing Read codes for

each consultation, episodes of CTS were more frequently and accurately recorded. This would not however explain the continuing increase of the incidence in CTS post 2005.

Between 2000 and 2004, the Government implemented the second phase of its 'War on Waiting,' i.e. the reduction of waiting times. For example, the maximum wait for a day-case procedure (e.g. a CTR) was reduced from 18 months to 6 months. [36] The peak in prevalence of CTS (with our definition partly based also on treatment codes, which in 2013 constituted 29.36% of prevalent patients) observed in 2004 may therefore be partly explained by the fact that patients requiring surgery were 'accumulating' between 2000 and 2004 and subsequently received definitive treatment. This effect would however not be expected to impact so heavily upon the incidence, which disregards repeat patient presentations in subsequent annual periods, unless patients with a less specific code received treatment and appeared as an incident case. The introduction of the 18 week target of time from referral to treatment in 2008 did not seem to have a similar impact on estimates of prevalence or incidence of CTS, which makes it less certain to what extent these policy changes may have influenced our results. There are likely to be further reasons behind the observed changes.

The change in trends of 2004 may also represent a change in service. The introduction of the Quality and Outcome Framework (QOF) occurred with the advent of the General Medical Services (GMS) contract in 2004. Although there has never been a musculoskeletal health domain, the importance of coding to maintain registers and evidence of outcomes in line with QOF may have influenced coding behaviour.

At the same time as QOF, Primary Care Trusts (PCT's) were given a role in commissioning services. The ability of PCT's to commission new services heralded the development of the Musculoskeletal Interface Clinics (MIC), which act as a 'one stop shop' for patients with musculoskeletal problems. A referral to this clinic from primary care may also be a reason prevalent patients with persisting symptoms stopped presenting in primary care.

These three factors (improved coding, service redevelopment and a reduction in waiting times) may all partly explain the change in incidence and prevalence of CTS between 2000 and 2004 but are unlikely to fully explain the observed trends. Further factors of potential influence may include the increasing rates of risk factors of CTS such as diabetes and obesity.[37, 38] Whilst standardising the prevalence and incidence by age and gender did not change the overall picture of the changing trends, supplementary Figure 1 suggests that the prevalence of CTS increased most obviously in the male and female over 70 year groups.

The Joinpoint analysis suggested an increase in surgical management of CTS between 1993 and 2007 (APC = 2.55), followed by a reducing trend between 2007 (95% CI 2004-2009) and the end of the study in 2013 (APC = -1.72).

Previous studies have described the epidemiology and the rates of CTR in the UK. This study provides updated data observing the presenting primary care population. Using data from the General Practice Research Database (GPRD) (forerunner to CPRD) Latinovic et al reported that 31% of patients with CTS had surgery in 2000 [18], which is similar to the 25.5% found in our study at the same time point. The small difference between the estimates may be the result of a difference in the calculation used to derive the denominator population. Audit data from one tertiary hand centre, Wild et al also showed that the rate of referrals for CTR surgery had increased over the 10 years between 1989-9 and 2000-1.[25] Furthermore, Bebbington and Furniss observed demographic population shifts in hand conditions including CTS within Hospital Episode Statistics, which record diagnoses and

1  
2  
3 procedures performed within NHS Hospitals in England. They used linear regression to  
4 predict future trends in hand surgery, showing that whilst absolute numbers of CTS  
5 diagnoses and CTR procedures increased between 1998 and 2011, the pre-2008 increase  
6 in CTR was significantly steeper than the post-2008 slope ( $p < 0.001$ ).[26] This is suggestive  
7 of a decrease in the surgical management of CTS in terms of the proportion of patients with  
8 CTS having an operation, but not necessarily in the numbers of surgical episodes in  
9 absolute terms, which Bebbington and Furniss predict will have increased by 99% (95% CI  
10 65 – 132) in 2030 compared to 2011.[26] The data from CPRD however, suggested a  
11 reduction in both real term episodes of CTR as well as the proportion of the (increasing)  
12 prevalent population receiving surgical treatment.  
13

14 We may speculate regarding potential reasons for the initial increase in surgical  
15 management of CTS, for example, increased access to specialist services (e.g. community  
16 based Musculoskeletal Interface Clinics); increased litigation leading to more definitive  
17 treatments being sought, and increased patient expectations and demand, but we have no  
18 evidence for such explanations.  
19

20 The decreasing trend in the use of the use of CTR post 2007 is likely to be multifactorial,  
21 however the changing structure of the NHS and its funding streams may have influenced the  
22 observed trend. Around 2007 – 2008, practice-based commissioning (PBC) was being  
23 introduced. This gave primary care notional budgets with which to purchase care for their  
24 patients with the aim of aligning clinical and financial responsibility. Restricting access to  
25 certain procedures including CTR, by implementing pre-specified criteria, was one way to  
26 help achieve this, which may have resulted in a reduction in the use of CTR.  
27

28 There are a number of limitations associated with the data in this study. The accuracy of  
29 consultation data is dependent on the validity of the computerised information it uses. In a  
30 review of 212 publications which aimed to validate diagnoses recorded in GPRD data,  
31 Herrett et reported that the median proportion of cases with a confirmed diagnosis was 89%  
32 (range 24 – 100%), but the majority of publications did not present the sensitivity of a coded  
33 diagnosis, which means that information regarding the proportion of missed cases is lacking.  
34 Potential misclassification; non-attendance in primary care; variation in between GP coding  
35 and a lack of coding may all lead to an unmeasured shortfall in observed cases.[27, 39]. This  
36 study relies on the diagnosis of CTS to be correct and the subsequent coding to be precise.  
37 Whilst CTS diagnoses have not been validated, in a study comparing musculoskeletal  
38 diagnoses in four different databases, Jordan et al suggested that musculoskeletal coding in  
39 GPRD was less reliable than in its other healthcare datasets including CiPCA.[40] We took  
40 measures to reduce the effect of miscoding (e.g. including surgery and injection codes in  
41 prevalence measures, if diagnostic codes had not been used), but it is possible that results  
42 will not be entirely representative of the true prevalence and incidence of CTS.  
43  
44

45 Given the lack of clarity in the accuracy of coding and the likelihood that associated clinical  
46 encounters following a CTR were coded using a surgical code, only the first surgical code  
47 could reliably be used to indicate an episode of surgery. This is likely to have led to an  
48 underestimation of surgical episodes being identified as episodes on the contralateral hand  
49 will have been automatically discounted as they were undistinguishable. Furthermore,  
50 prevalence and incidence were similarly likely to have been underestimated as repeat  
51 presentations for the ipsilateral hand are indistinguishable from presentations in the  
52 contralateral hand.  
53

54 Whilst CPRD provides a large generalizable sample, which has substantial benefits when  
55 estimating epidemiological trends, it cannot directly measure patient reported outcomes.  
56 Furthermore, surgery can be seen as a 'gold standard' treatment, but it does not necessarily  
57

1  
2  
3 signify cure. A review of the surgical treatment of CTS reported that 70% - 90% of patients  
4 undergoing a CTR have a good outcome (definitions varied).[41] In a retrospective cohort  
5 study over a mean follow up of 13 years post-surgery, 88% of patients were either  
6 completely satisfied or very satisfied with surgery. 74% reported their symptoms had  
7 completely resolved. 1.8% (113 patients) had undergone repeat surgery. [42] There is little  
8 evidence however that CTR is an appropriate initial management option for patients  
9 presenting to primary care with mild to moderate symptoms, especially in the absence of  
10 high quality trial evidence that conservative management is ineffective.[43, 44]  
11

12 Future research in this field could describe the characteristics of patients presenting with  
13 CTS in greater detail, and observe course and prognosis of CTS in primary care. It may then  
14 be possible to identify predictors of the outcome of primary care management, and  
15 potentially identify patients requiring surgery.  
16

## 17 **CONCLUSION**

18 An increase in the incidence and prevalence of CTS is likely to lead to an increased demand  
19 on services and cost to the healthcare economy.[26] This study has demonstrated an  
20 increase in the prevalence and incidence of physician diagnosed carpal tunnel syndrome  
21 over the study period between 1993 and 2013. Rates of referral for CTS and surgical  
22 intervention have also increased over the study period, however in the later years of the  
23 study, the percent of patients receiving surgery has begun to decline.  
24

## 25 **Figures**

26  
27 Figure 1 Joinpoint analysis of the crude prevalence of carpal tunnel syndrome between 1993  
28 and 2013  
29

30 Figure 2 Joinpoint analysis of the crude incidence of carpal tunnel syndrome between 1993  
31 and 2013  
32

33 Figure 3 Joinpoint analysis of percentage of prevalent patients having carpal tunnel surgery  
34

## 35 **Acknowledgments**

36 The authors wish to thank Dr Dahai Yu for his assistance with the CPRD data download.  
37

## 38 **Declaration of competing interests**

39 "All authors have completed the ICMJE uniform disclosure form  
40 at [www.icmje.org/coi\\_disclosure.pdf](http://www.icmje.org/coi_disclosure.pdf) and declare: no support from any organisation for the  
41 submitted work; CB is funded by the National Institute of Health Research School for  
42 Primary Care (NIHR SPCR). The views expressed are those of the authors and not  
43 necessarily those of the NIHR, the NHS or the Department of health; DvdW is a member of  
44 PROGRESS Medical Research Council Prognosis Research Strategy (PROGRESS)  
45 Partnership (G0902393/99558); no other relationships or activities that could appear to have  
46 influenced the submitted work."  
47

## 48 **Details of contributors**

49  
50 CB, LC, YC and DvdW all contributed to the initial draft and subsequent revisions. CB is the  
51 guarantor of the paper. All authors had full access to all of the data and can take  
52 responsibility for the integrity of the data and the accuracy of the data analysis. CB affirms  
53 that the manuscript is an honest, accurate, and transparent account of the study being  
54 reported; that no important aspects of the study have been omitted and that any  
55 discrepancies from the study as planned have been explained.  
56  
57

## Data sharing

To ensure patient privacy and confidentiality, data from the CPRD cannot be shared. Therefore, no additional data are available.

## Copyright, open access and permission to reuse

The Corresponding Author has the right to grant on behalf of all authors and does grant on behalf of all authors, [a worldwide licence](#) to the Publishers and its licensees in perpetuity, in all forms, formats and media (whether known now or created in the future), to i) publish, reproduce, distribute, display and store the Contribution, ii) translate the Contribution into other languages, create adaptations, reprints, include within collections and create summaries, extracts and/or, abstracts of the Contribution, iii) create any other derivative work(s) based on the Contribution, iv) to exploit all subsidiary rights in the Contribution, v) the inclusion of electronic links from the Contribution to third party material where-ever it may be located; and, vi) licence any third party to do any or all of the above.

## References

- 1 Alfonso C, Jann S, Massa R, et al. Diagnosis, treatment and follow-up of the carpal tunnel syndrome: A review. *Neurological Sciences* 2010;31:243-52.
- 2 Aroori S, Spence RA. Carpal tunnel syndrome. *Ulster Med J* 2008;77:6-17.
- 3 Padua L, Padua R, Lo Monaco M, et al. Multiperspective assessment of carpal tunnel syndrome: A multicenter study. *Neurology* 1999;53:1654-9.
- 4 Foley M, Silverstein B, Polissar N. The economic burden of carpal tunnel syndrome: long-term earnings of CTS claimants in Washington State. *Am J Ind Med* 2007;50:155-72.
- 5 Atroshi I, Gummesson C, Johnsson R, et al. Symptoms, disability, and quality of life in patients with carpal tunnel syndrome. *Journal of Hand Surgery - American Volume* 1999;24:398-404.
- 6 Jenkins PJ, Srikantharajah D, Duckworth AD, et al. Carpal tunnel syndrome: the association with occupation at a population level. *Journal of Hand Surgery-European Volume* 2013;38E:67-72 doi:10.1177/1753193412455790.
- 7 Middleton SD, Anakwe RE. Carpal tunnel syndrome. *BMJ* 2014;349 doi:10.1136/bmj.g6437.
- 8 Padua L, Coraci D, Erra C, et al. Carpal tunnel syndrome: clinical features, diagnosis, and management. *Lancet Neurol* 2016;15:1273-84 doi:S1474-4422(16)30231-9 [pii].
- 9 American Academy of Orthopaedic Surgeons. Clinical practice guideline on the diagnosis of carpal tunnel syndrome 2007.
- 10 Carpal Tunnel Syndrome. Available at: <http://cks.nice.org.uk/carpal-tunnel-syndrome#!scenariorecommendation:1>. Accessed 05/14, 2013.
- 11 Carpal Tunnel Syndrome (CTS) - The Map of Medicine. Available at: <http://app.mapofmedicine.com/mom/127/page.html?department-id=8&specialty-id=1037&pathway-id=3411&page-id=8741&history=clear>. Accessed 25/10/2012, 2012.

- 1  
2  
3 12 Royal College of Surgeons. Commissioning Guide: Treatment of Carpal Tunnel  
4 Syndrome 2016.  
5  
6 13 Middleton SD, Anakwe RE. *BMJ* 2014;349 doi:10.1136/bmj.g6437.  
7  
8 14 Ferry S, Pritchard T, Keenan J, et al. Estimating the prevalence of delayed median nerve  
9 conduction in the general population. *Br J Rheumatol* 1998;37:630-5.  
10  
11 15 de Krom MC, Knipschild PG, Kester AD, et al. Carpal tunnel syndrome: prevalence in the  
12 general population. *J Clin Epidemiol* 1992;45:373-6.  
13  
14 16 Atroshi I. Carpal tunnel syndrome--prevalence, electrodiagnosis and outcome  
15 instruments. *Acta Orthop Scand* 1999;70:70-1.  
16  
17 17 Papanicolaou GD, McCabe SJ, Firrell J. The prevalence and characteristics of nerve  
18 compression symptoms in the general population. *Journal of Hand Surgery - American*  
19 *Volume* 2001;26:460-6.  
20  
21 18 Latinovic R, Gulliford MC, Hughes RA. Incidence of common compressive neuropathies  
22 in primary care. *J Neurol Neurosurg Psychiatry* 2006;77:263-5  
23 doi:10.1136/jnnp.2005.066696.  
24  
25 19 Bland JDP, Rudolfer SM. Clinical surveillance of carpal tunnel syndrome in two areas of  
26 the United Kingdom, 1991–2001. *Journal of Neurology, Neurosurgery & Psychiatry*  
27 2003;74:1674-9 doi:10.1136/jnnp.74.12.1674.  
28  
29 20 Gelfman R, Melton LJ, 3rd, Yawn BP, et al. Long-term trends in carpal tunnel syndrome.  
30 *Neurology* 2009;72:33-41 doi:10.1212/01.wnl.0000338533.88960.b9;  
31 10.1212/01.wnl.0000338533.88960.b9.  
32  
33 21 Bongers FJ, Schellevis FG, van den Bosch WJ, et al. Carpal tunnel syndrome in general  
34 practice (1987 and 2001): incidence and the role of occupational and non-occupational  
35 factors. *Br J Gen Pract* 2007;57:36-9.  
36  
37 22 Atroshi I, Englund M, Turkiewicz A, et al. Incidence of physician-diagnosed carpal tunnel  
38 syndrome in the general population. *Arch Intern Med* 2011;171:943-5.  
39  
40 23 Jenkins PJ, Watts AC, Duckworth AD, et al. Socioeconomic deprivation and the  
41 epidemiology of carpal tunnel syndrome. *Journal of Hand Surgery-European Volume*  
42 2012;37E:123-9 doi:10.1177/1753193411419952.  
43  
44 24 Nordstrom DL, DeStefano F, Vierkant RA, et al. Incidence of diagnosed carpal tunnel  
45 syndrome in a general population. *Epidemiology* 1998;9:342-5.  
46  
47 25 Wildin C, Dias JJ, Heras-Palou C, et al. Trends in elective hand surgery referrals from  
48 primary care. *Ann R Coll Surg Engl* 2006;88:543-6 doi:10.1308/003588406X117070.  
49  
50 26 Bebbington E, Furniss D. Linear regression analysis of Hospital Episode Statistics  
51 predicts a large increase in demand for elective hand surgery in England. *J Plast Reconstr*  
52 *Aesthet Surg* 2015;68:243-51 doi:10.1016/j.bjps.2014.10.011 [doi].  
53  
54 27 Herrett E, Gallagher AM, Bhaskaran K, et al. Data Resource Profile: Clinical Practice  
55 Research Datalink (CPRD). *Int J Epidemiol* 2015;44:827-36 doi:10.1093/ije/dyv098 [doi].  
56  
57  
58  
59  
60

1  
2  
3 28 Chisholm J. The Read clinical classification. *BMJ* 1990;300:1092.

4  
5 29 Jordan K, Porcheret M, Croft P. Quality of morbidity coding in general practice  
6 computerized medical records: a systematic review. *Fam Pract* 2004;21:396-412  
7 doi:10.1093/fampra/cmh409 [doi].

8  
9 30 Population Estimates. Available at:

10 <https://www.ons.gov.uk/peoplepopulationandcommunity/populationandmigration/populationestimates>. Accessed 02/16, 2017.

11  
12  
13 31 National Cancer Institute. Joinpoint Regression Program - Surveillance Research  
14 Program 2017.

15  
16 32 Bedson J, Chen Y, Hayward RA, et al. Trends in long-term opioid prescribing in primary  
17 care patients with musculoskeletal conditions: an observational database study. *Pain*  
18 2016;157:1525-31 doi:10.1097/j.pain.0000000000000557.

19  
20 33 Descatha A, Dale AM, Franzblau A, et al. Comparison of research case definitions for  
21 carpal tunnel syndrome. *Scand J Work Environ Health* 2011;37:298-306  
22 doi:10.5271/sjweh.3148.

23  
24 34 NHS Executive. *Information for Health: An Information Strategy for the Modern NHS*  
25 *1998–2005. A National Strategy for Local Implementation* 1998.

26  
27 35 Porcheret M, Hughes R, Evans D, et al. Data quality of general practice electronic health  
28 records: the impact of a program of assessments, feedback, and training. *Journal of the*  
29 *American Medical Informatics Association* 2004;11:78-86  
30 doi:<http://dx.doi.org/10.1197/jamia.M1362>.

31  
32 36 Lewis R, Appleby J. Can the English NHS meet the 18-week waiting list target?. *J R Soc*  
33 *Med* 2006;99:10-3.

34  
35 37 Pourmemari MH, Shiri R. Diabetes as a risk factor for carpal tunnel syndrome: a  
36 systematic review and meta-analysis. *Diabetic Med* 2016;33:10-6 doi:10.1111/dme.12855.

37  
38 38 Shiri R, Pourmemari MH, Falah-Hassani K, et al. The effect of excess body mass on the  
39 risk of carpal tunnel syndrome: a meta-analysis of 58 studies. *Obesity Reviews*  
40 2015;16:1094-104 doi:10.1111/obr.12324.

41  
42 39 Herrett E, Thomas SL, Schoonen WM, et al. Validation and validity of diagnoses in the  
43 General Practice Research Database: a systematic review. *Br J Clin Pharmacol* 2009;69:4-  
44 14 doi:10.1111/j.1365-2125.2009.03537.x.

45  
46 40 Jordan K, Clarke AM, Symmons DP, et al. Measuring disease prevalence: a comparison  
47 of musculoskeletal disease using four general practice consultation databases. *Br J Gen*  
48 *Pract* 2007;57:7-14.

49  
50 41 Turner A, Kimble F, Gulyás K, et al. Can the outcome of open carpal tunnel release be  
51 predicted?: a review of the literature. *ANZ J Surg* 2010;80:50-4 doi:10.1111/j.1445-  
52 2197.2009.05175.x.

53  
54 42 Louie DL, Earp BE, Collins JE, et al. *The Journal of Bone & Joint Surgery* 2013;95:1067-  
55 73 doi:10.2106/JBJS.L.00903.

1  
2  
3  
4  
5  
6  
7  
8  
9  
10  
11  
12  
13  
14  
15  
16  
17  
18  
19  
20  
21  
22  
23  
24  
25  
26  
27  
28  
29  
30  
31  
32  
33  
34  
35  
36  
37  
38  
39  
40  
41  
42  
43  
44  
45  
46  
47  
48  
49  
50  
51  
52  
53  
54  
55  
56  
57  
58  
59  
60

43 Marshall S, Tardif G, Ashworth N. Local corticosteroid injection for carpal tunnel syndrome. *Cochrane database of systematic reviews (Online)* 2007:001554.

44 Page MJ, Massy-Westropp N, O'Connor D, et al. Splinting for carpal tunnel syndrome. *Cochrane Database Syst Rev* 2012;7:CD010003 doi:10.1002/14651858.CD010003.

For peer review only



Joinpoint analysis of the crude prevalence of carpal tunnel syndrome between 1993 and 2013

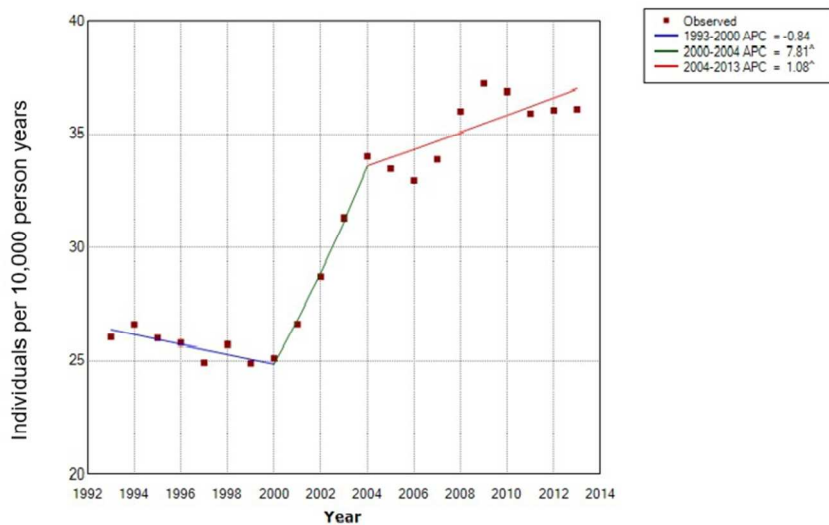

Figure 1 Joinpoint analysis of the crude prevalence of carpal tunnel syndrome between 1993 and 2013

^APC = annual percentage change, which is significantly different from zero, significance level  $p < 0.05$

Figure 1 Joinpoint analysis of the crude prevalence of carpal tunnel syndrome between 1993 and 2013

73x50mm (300 x 300 DPI)

Joinpoint analysis of the crude incidence of carpal tunnel syndrome between 1993 and 2013

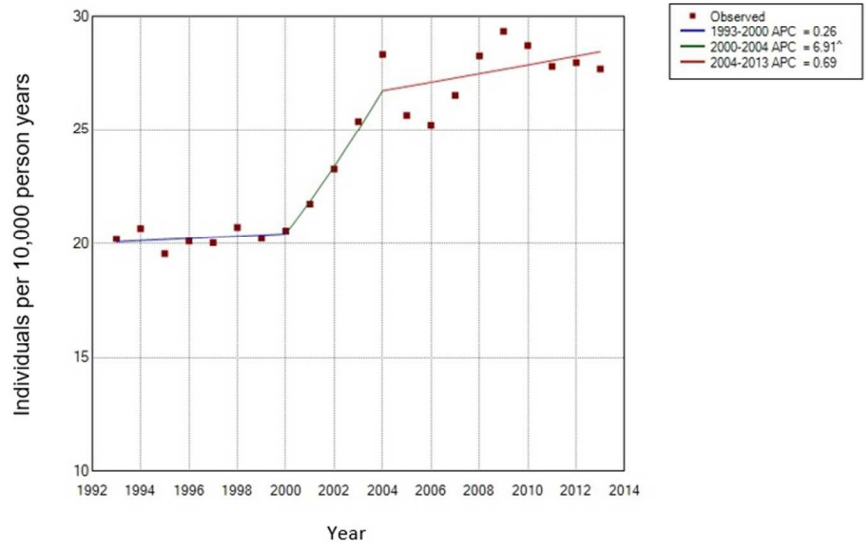

Figure 2 Joinpoint analysis of the crude incidence of carpal tunnel syndrome between 1993 and 2013

^APC = annual percentage change, which is significantly different from zero, significance level  $p < 0.05$

Figure 2 Joinpoint analysis of the crude incidence of carpal tunnel syndrome between 1993 and 2013

71x52mm (300 x 300 DPI)

Joinpoint analysis of the percentage of prevalent patients with a recorded episode of carpal tunnel release, in each calendar year syndrome, between 1993 and 2013

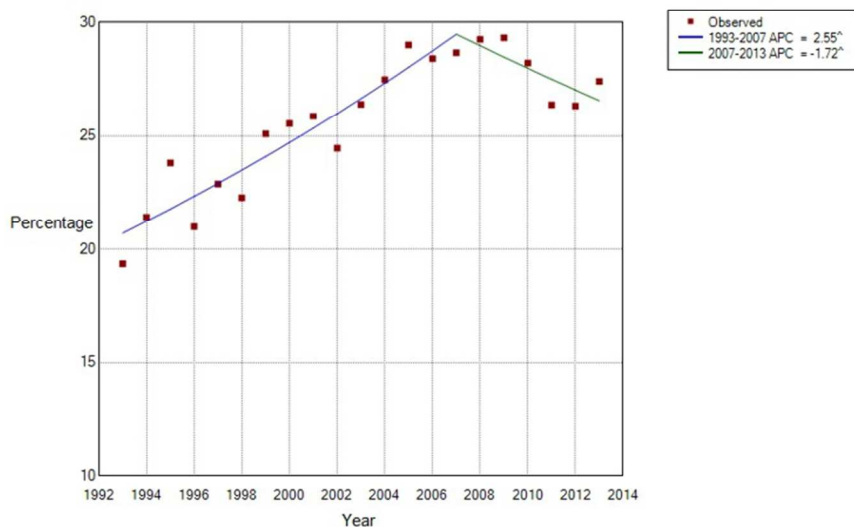

Figure 3 Joinpoint analysis of percentage of prevalent patients having carpal tunnel surgery

^APC = annual percentage change, which is significantly different from zero, significance level  $p < 0.05$

Figure 3 Joinpoint analysis of the percentage of prevalent patients having carpal tunnel surgery

72x53mm (300 x 300 DPI)

1  
2  
3  
4  
5  
6  
7  
8  
9  
10  
11  
12  
13  
14  
15  
16  
17  
18  
19  
20  
21  
22  
23  
24  
25  
26  
27  
28  
29  
30  
31  
32  
33  
34  
35  
36  
37  
38  
39  
40  
41  
42  
43  
44  
45  
46  
47

Graph to show prevalence by age and gender between 1993 and 2013

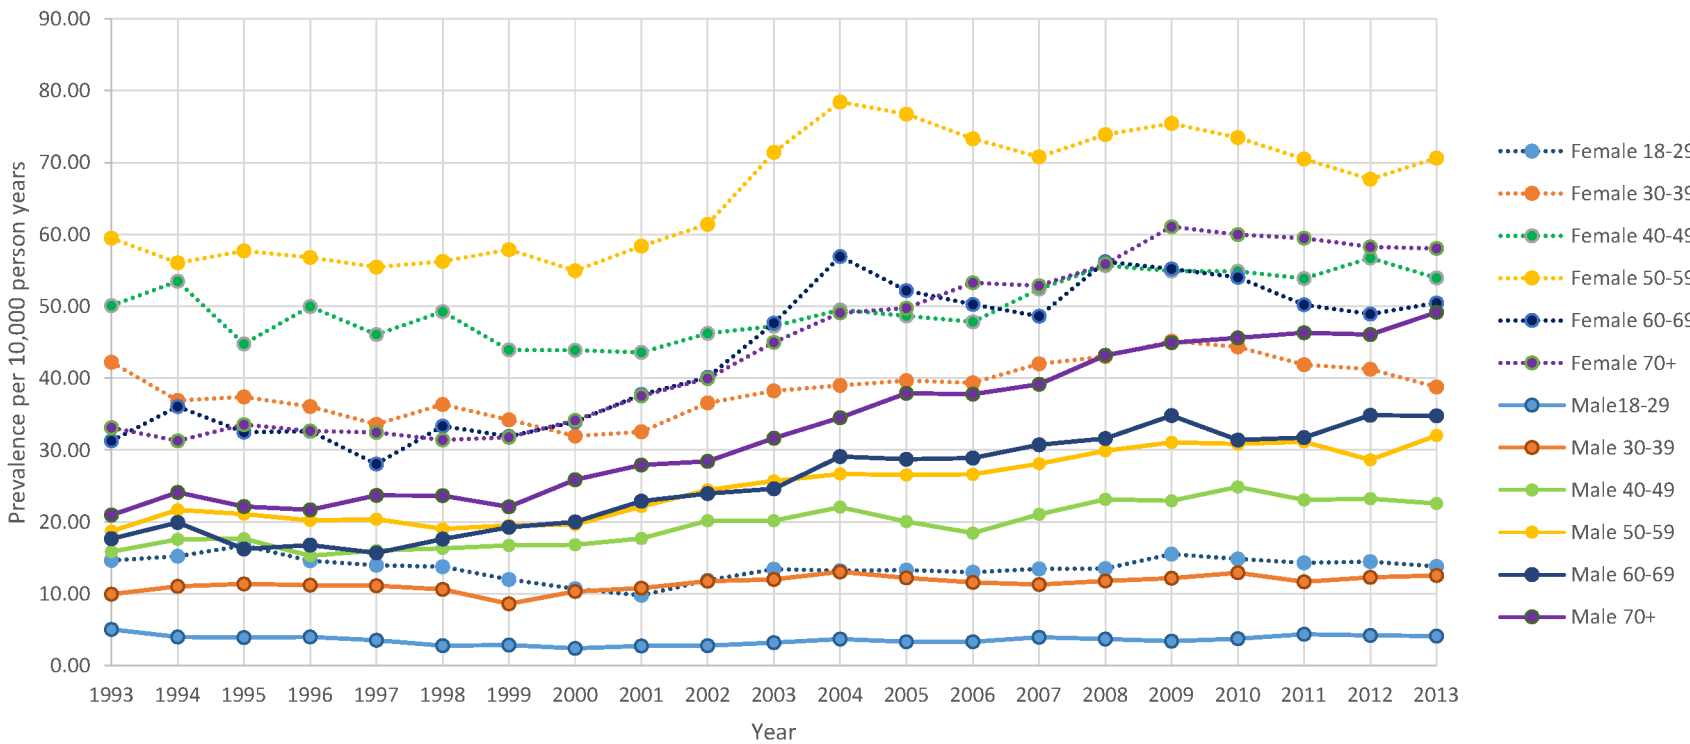

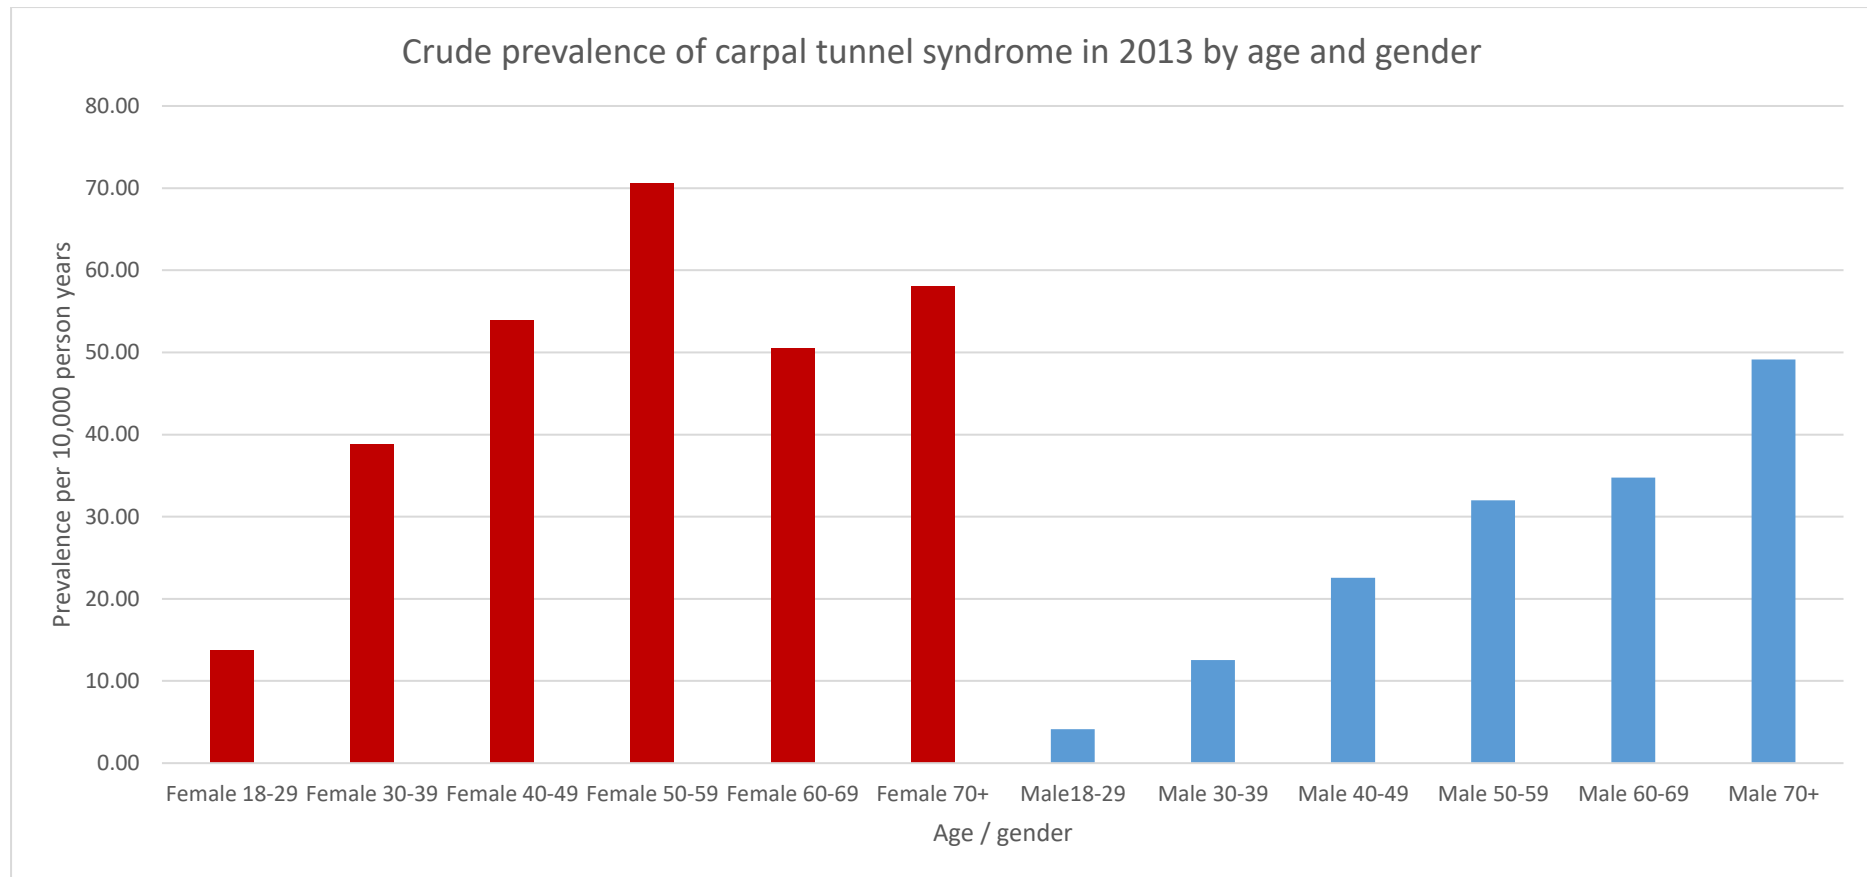

31  
32  
33  
34  
35  
36  
37  
38  
39  
40  
41  
42  
43  
44  
45  
46

Suppl. Fig 2 Crude prevalence of carpal tunnel syndrome in 2013 by age and gender

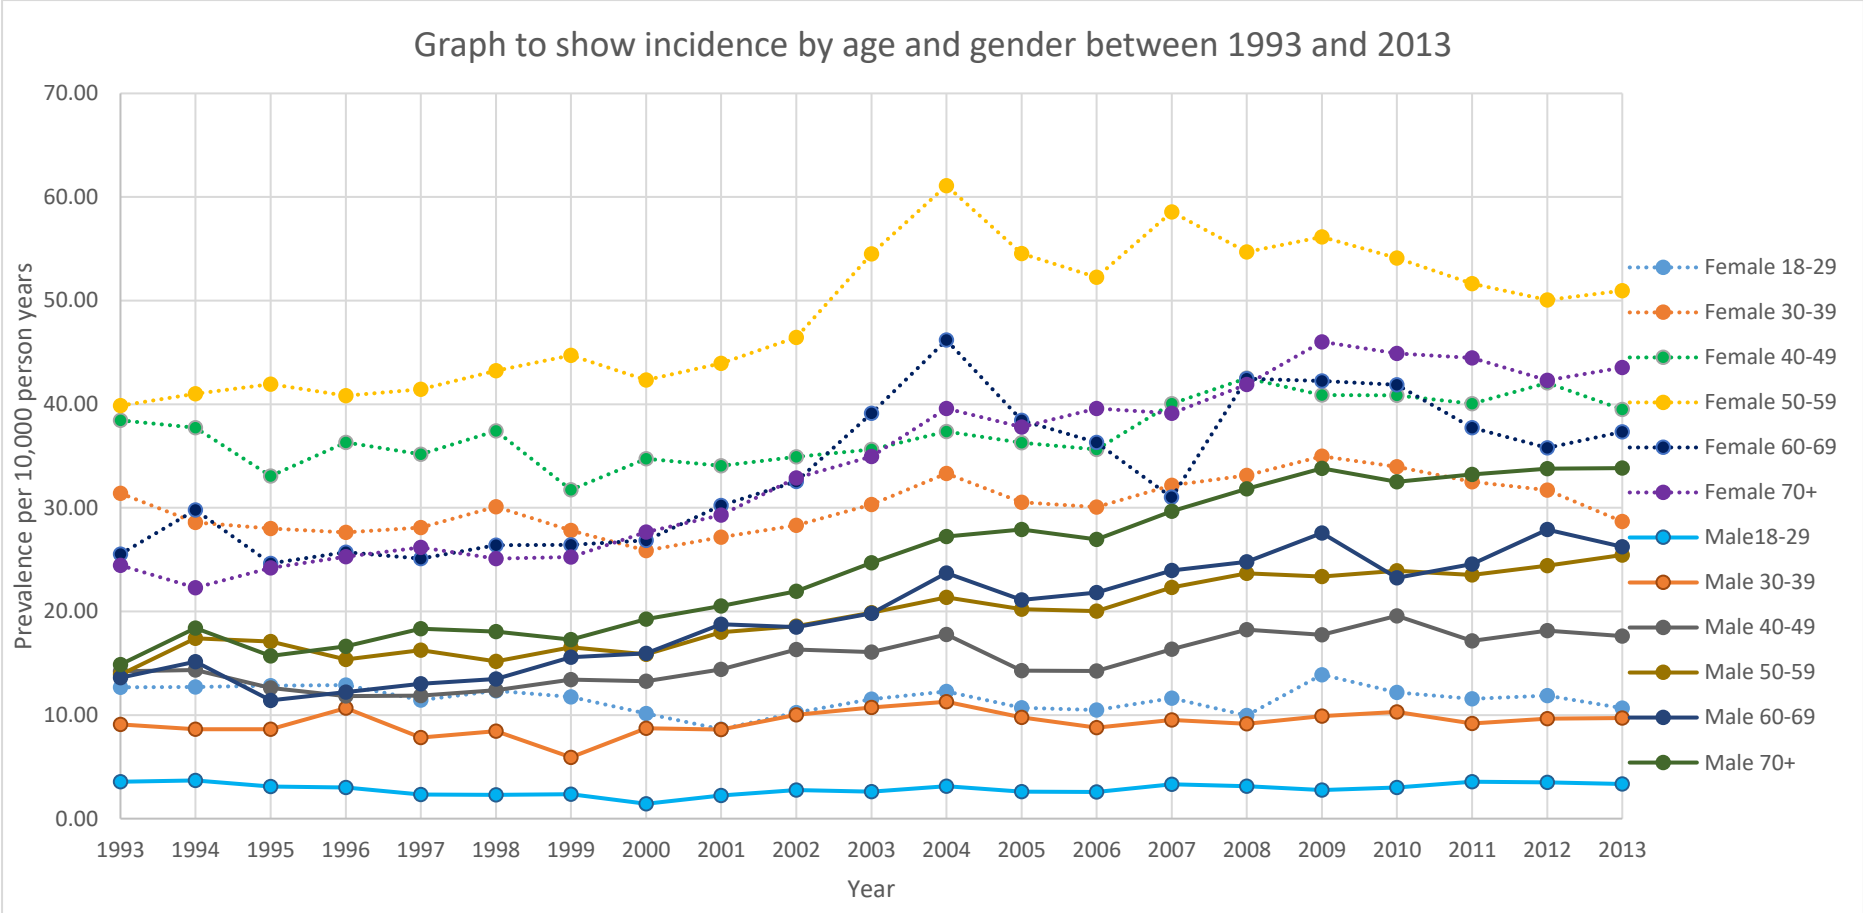

Suppl. Fig 3 Graph to show incidence by age and gender between 1993 and 2013

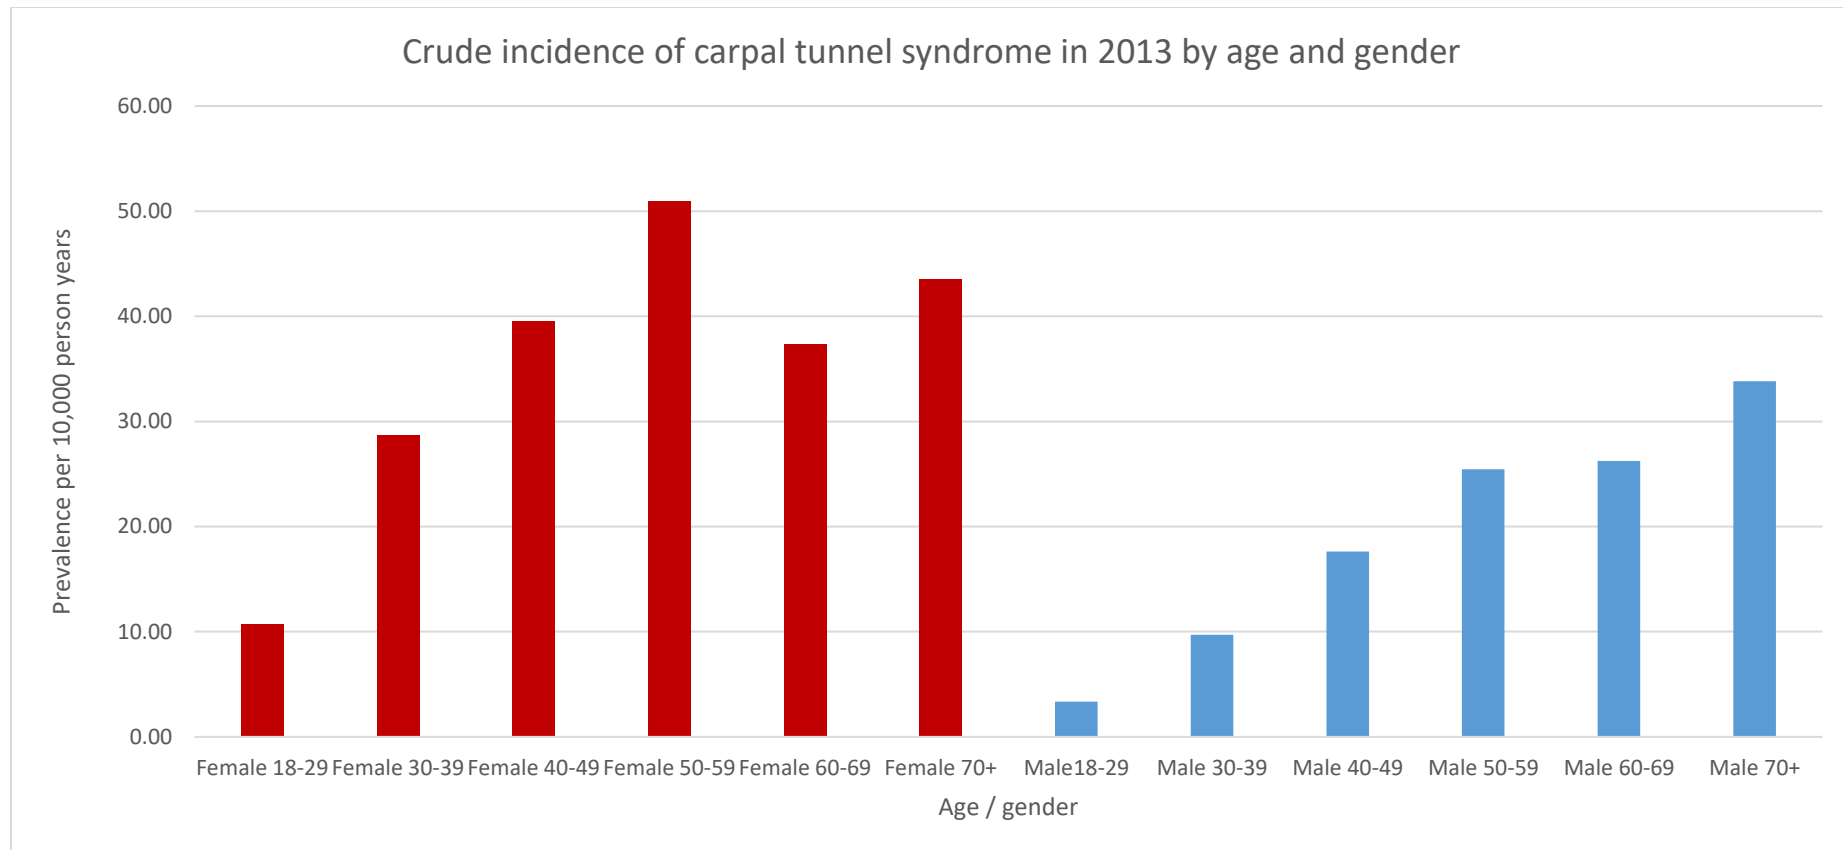

32  
33  
34  
35  
36  
37  
38  
39  
40  
41  
42  
43  
44  
45  
46

Suppl. Fig 4 Crude incidence of carpal tunnel syndrome in 2013 by age and gender

Suppl. Table 1 The age and sex standardised estimates of the annual prevalence and incidence of CTS

| <b>Year</b> | <b>Age sex standardised prevalence (per 10,000 person years, 95% CI)</b> | <b>Age sex standardised incidence (per 10,000 person years, 95% CI)</b> |
|-------------|--------------------------------------------------------------------------|-------------------------------------------------------------------------|
| 1993        | 26.27 (26.13 – 26.42)                                                    | 19.95 (19.83 – 20.07)                                                   |
| 1994        | 26.83 (26.69 – 26.98)                                                    | 20.46 (20.34 – 20.59)                                                   |
| 1995        | 25.90 (25.77 – 26.05)                                                    | 19.20 (19.08 – 19.33)                                                   |
| 1996        | 25.64 (25.50 – 25.78)                                                    | 19.61 (19.49 – 19.74)                                                   |
| 1997        | 24.64 (24.20 – 25.07)                                                    | 19.42 (19.30 – 19.55)                                                   |
| 1998        | 25.42 (25.88 – 25.56)                                                    | 20.05 (19.93 – 20.18)                                                   |
| 1999        | 24.57 (24.44 – 24.71)                                                    | 19.51 (19.39 – 19.64)                                                   |
| 2000        | 24.77 (24.63 – 24.91)                                                    | 19.73 (19.61 – 19.86)                                                   |
| 2001        | 26.22 (26.08 – 26.36)                                                    | 20.75 (20.63 – 20.88)                                                   |
| 2002        | 28.22 (28.07 – 28.37)                                                    | 22.22 (22.10 – 22.36)                                                   |
| 2003        | 30.81 (30.65 – 30.96)                                                    | 24.28 (24.15 – 24.42)                                                   |
| 2004        | 33.51 (33.35 – 33.67)                                                    | 27.00 (26.86 – 27.14)                                                   |
| 2005        | 32.98 (32.82 – 33.14)                                                    | 24.56 (24.42 – 24.70)                                                   |
| 2006        | 32.55 (32.39 – 32.70)                                                    | 24.14 (24.00 – 24.27)                                                   |
| 2007        | 33.48 (33.32 – 33.64)                                                    | 25.52 (25.38 – 25.66)                                                   |
| 2008        | 35.59 (35.43 – 25.76)                                                    | 27.07 (26.92 – 27.21)                                                   |
| 2009        | 36.81 (36.64 – 36.98)                                                    | 28.19 (28.05 – 28.34)                                                   |
| 2010        | 36.40 (36.24 – 36.66)                                                    | 27.53 (27.39 – 27.68)                                                   |
| 2011        | 35.28 (35.12 – 35.44)                                                    | 26.59 (26.45 – 26.74)                                                   |
| 2012        | 35.50 (35.34 – 35.67)                                                    | 26.75 (26.61 – 26.89)                                                   |
| 2013        | 35.45 (35.29 – 35.61)                                                    | 26.34 (26.01 – 26.49)                                                   |



Suppl. Table 2. Demographics of the crude prevalent population presenting with CTS in each calendar year

| Year | Female median age<br>(25% - 75%<br>Interquartile range) | Male median age<br>(25% - 75%<br>Interquartile range) |
|------|---------------------------------------------------------|-------------------------------------------------------|
| 1993 | 49 (38 – 62)                                            | 53 (42 – 66)                                          |
| 1994 | 49 (39 – 62)                                            | 53 (42 – 66)                                          |
| 1995 | 50 (39 – 62)                                            | 52 (41 – 64)                                          |
| 1996 | 50 (40 – 62)                                            | 53 (41 – 66)                                          |
| 1997 | 51 (40 – 62)                                            | 53 (42 – 67)                                          |
| 1998 | 51 (40 – 62)                                            | 54 (43 – 67)                                          |
| 1999 | 51 (40 – 62)                                            | 54 (44 – 66)                                          |
| 2000 | 52 (41 – 64)                                            | 55 (44 – 67)                                          |
| 2001 | 53 (42 – 65)                                            | 55 (44 – 68)                                          |
| 2002 | 53 (41 – 64)                                            | 55 (44 – 67)                                          |
| 2003 | 54 (42 – 65)                                            | 55 (44 – 68)                                          |
| 2004 | 55 (43 – 65)                                            | 56 (45 – 68)                                          |
| 2005 | 54 (43 – 65)                                            | 58 (45 – 70)                                          |
| 2006 | 54 (43 – 66)                                            | 58 (45 – 70)                                          |
| 2007 | 54 (42 – 66)                                            | 54 (42 – 66)                                          |
| 2008 | 54 (43 – 66)                                            | 58 (46 – 70)                                          |
| 2009 | 54 (43 – 67)                                            | 58 (47 – 70)                                          |
| 2010 | 54 (43 – 67)                                            | 57 (46 – 71)                                          |
| 2011 | 54 (43 – 67)                                            | 58 (47 – 71)                                          |
| 2012 | 54 (43 – 67)                                            | 59 (48 – 71)                                          |

Suppl. Table 3. Demographics of the crude incident population presenting with CTS in each calendar year

| <b>Year</b> | <b>Female median age<br/>(25% - 75%<br/>Interquartile range)</b> | <b>Male median age<br/>(25% - 75%<br/>Interquartile range)</b> |
|-------------|------------------------------------------------------------------|----------------------------------------------------------------|
| 1993        | 50 (39 – 63)                                                     | 51 (42 – 65)                                                   |
| 1994        | 50 (40 – 63)                                                     | 53 (43 – 66)                                                   |
| 1995        | 51 (40 – 63)                                                     | 53 (42 – 64)                                                   |
| 1996        | 51 (40 – 64)                                                     | 52 (41 – 65)                                                   |
| 1997        | 51 (40 – 64)                                                     | 55 (45 – 67)                                                   |
| 1998        | 51 (40 – 63)                                                     | 54 (44 – 68)                                                   |
| 1999        | 52 (41 – 64)                                                     | 55 (45 – 67)                                                   |
| 2000        | 53 (42 – 65)                                                     | 55 (44 – 68)                                                   |
| 2001        | 53 (42 – 66)                                                     | 55 (45 – 68)                                                   |
| 2002        | 54 (42 – 66)                                                     | 55 (44 – 67)                                                   |
| 2003        | 55 (43 – 66)                                                     | 56 (45 – 68)                                                   |
| 2004        | 55 (44 – 66)                                                     | 57 (45 – 68)                                                   |
| 2005        | 55 (43 – 66)                                                     | 58 (46 – 70)                                                   |
| 2006        | 55 (44 – 67)                                                     | 58 (46 – 70)                                                   |
| 2007        | 54 (43 – 66)                                                     | 58 (47 – 70)                                                   |
| 2008        | 55 (44 – 67)                                                     | 58 (47 – 70)                                                   |
| 2009        | 55 (44 – 67)                                                     | 59 (47 – 71)                                                   |

Suppl. Table 4 The crude prevalence of CTS by age and gender

| Prevalence by age and gender | 1993      | 1994      | 1995      | 1996      | 1997      | 1998      | 1999      | 2000      | 2001      | 2002      | 2003      | 2004      | 2005      | 2006      | 2007      | 2008      | 2009      | 2010      | 2011      | 2012      | 2013      |
|------------------------------|-----------|-----------|-----------|-----------|-----------|-----------|-----------|-----------|-----------|-----------|-----------|-----------|-----------|-----------|-----------|-----------|-----------|-----------|-----------|-----------|-----------|
| Female 18-29                 | 14.6<br>6 | 15.2<br>2 | 16.7<br>2 | 14.6<br>0 | 13.9<br>7 | 13.7<br>4 | 11.9<br>8 | 10.7<br>1 | 9.78      | 11.8<br>7 | 13.4<br>4 | 13.2<br>3 | 13.2<br>8 | 13.0<br>2 | 13.4<br>6 | 13.4<br>9 | 15.5<br>4 | 14.8<br>4 | 14.3<br>0 | 14.4<br>8 | 13.7<br>9 |
| Female 30-39                 | 42.2<br>1 | 36.8<br>7 | 37.3<br>7 | 36.0<br>4 | 33.5<br>7 | 36.3<br>4 | 34.2<br>0 | 31.9<br>4 | 32.5<br>5 | 36.5<br>7 | 38.2<br>1 | 38.9<br>7 | 39.6<br>7 | 39.3<br>4 | 41.9<br>8 | 42.9<br>9 | 45.1<br>5 | 44.3<br>4 | 41.8<br>7 | 41.2<br>4 | 38.7<br>8 |
| Female 40-49                 | 50.0<br>8 | 53.4<br>6 | 44.7<br>5 | 49.9<br>5 | 46.0<br>4 | 49.2<br>5 | 43.9<br>1 | 43.8<br>8 | 43.5<br>7 | 46.2<br>2 | 47.2<br>3 | 49.5<br>1 | 48.6<br>6 | 47.8<br>0 | 52.3<br>7 | 55.6<br>7 | 54.9<br>0 | 54.8<br>4 | 53.8<br>7 | 56.7<br>1 | 53.9<br>4 |
| Female 50-59                 | 59.4<br>6 | 56.0<br>2 | 57.7<br>1 | 56.7<br>8 | 55.4<br>6 | 56.2<br>3 | 57.8<br>7 | 54.9<br>4 | 58.4<br>0 | 61.4<br>1 | 71.3<br>9 | 78.4<br>1 | 76.7<br>1 | 73.2<br>9 | 70.7<br>7 | 73.8<br>7 | 75.4<br>4 | 73.4<br>6 | 70.4<br>8 | 67.6<br>7 | 70.6<br>0 |
| Female 60-69                 | 31.2<br>6 | 36.0<br>3 | 32.4<br>7 | 32.6<br>0 | 28.0<br>6 | 33.3<br>4 | 31.9<br>1 | 33.9<br>2 | 37.7<br>1 | 40.1<br>0 | 47.6<br>4 | 56.9<br>2 | 52.1<br>6 | 50.2<br>3 | 48.6<br>1 | 56.2<br>1 | 55.1<br>9 | 54.0<br>1 | 50.2<br>1 | 48.9<br>2 | 50.4<br>8 |
| Female 70+                   | 33.1<br>3 | 31.2<br>8 | 33.5<br>3 | 32.6<br>5 | 32.4<br>4 | 31.4<br>0 | 31.7<br>6 | 34.1<br>3 | 37.5<br>2 | 39.9<br>2 | 44.9<br>7 | 49.0<br>8 | 49.7<br>3 | 53.2<br>8 | 52.8<br>5 | 55.8<br>5 | 61.0<br>6 | 59.9<br>6 | 59.4<br>7 | 58.2<br>5 | 58.0<br>5 |
| Male 18-29                   | 5.04      | 4.00      | 3.93      | 4.00      | 3.55      | 2.78      | 2.88      | 2.42      | 2.74      | 2.80      | 3.22      | 3.69      | 3.34      | 3.31      | 3.95      | 3.70      | 3.41      | 3.76      | 4.36      | 4.21      | 4.12      |
| Male 30-39                   | 9.95      | 11.0<br>2 | 11.3<br>6 | 11.1<br>9 | 11.1<br>1 | 10.6<br>0 | 8.61      | 10.3<br>2 | 10.7<br>8 | 11.7<br>5 | 12.0<br>0 | 13.0<br>6 | 12.2<br>3 | 11.5<br>7 | 11.3<br>0 | 11.7<br>8 | 12.1<br>7 | 12.9<br>4 | 11.6<br>7 | 12.2<br>9 | 12.5<br>5 |
| Male 40-49                   | 15.8<br>5 | 17.5<br>9 | 17.6<br>5 | 15.3<br>0 | 16.0<br>0 | 16.3<br>3 | 16.7<br>3 | 16.8<br>1 | 17.7<br>1 | 20.1<br>5 | 20.1<br>8 | 22.0<br>4 | 20.0<br>2 | 18.4<br>5 | 21.0<br>6 | 23.1<br>4 | 22.9<br>3 | 24.8<br>7 | 23.0<br>6 | 23.2<br>1 | 22.5<br>8 |
| Male 50-59                   | 18.7<br>2 | 21.6<br>6 | 21.0<br>8 | 20.2<br>3 | 20.3<br>6 | 19.0<br>3 | 19.5<br>1 | 19.6<br>4 | 22.1<br>2 | 24.4<br>6 | 25.7<br>1 | 26.6<br>8 | 26.5<br>5 | 26.6<br>2 | 28.0<br>9 | 29.9<br>0 | 31.0<br>6 | 30.8<br>6 | 31.1<br>6 | 28.6<br>4 | 32.0<br>1 |
| Male 60-69                   | 17.6<br>4 | 19.9<br>2 | 16.2<br>2 | 16.7<br>8 | 15.6<br>8 | 17.6<br>2 | 19.2<br>7 | 19.9<br>9 | 22.9<br>1 | 23.9<br>3 | 24.6<br>1 | 29.0<br>8 | 28.7<br>1 | 28.8<br>7 | 30.7<br>3 | 31.5<br>9 | 34.8<br>1 | 31.4<br>1 | 31.7<br>1 | 34.8<br>4 | 34.7<br>5 |
| Male 70+                     | 20.9<br>5 | 24.1<br>2 | 22.1<br>6 | 21.6<br>9 | 23.7<br>1 | 23.6<br>5 | 22.1<br>1 | 25.8<br>6 | 27.9<br>3 | 28.4<br>3 | 31.6<br>5 | 34.5<br>1 | 37.9<br>1 | 37.7<br>6 | 39.1<br>6 | 43.1<br>9 | 44.9<br>3 | 45.6<br>0 | 46.3<br>3 | 46.0<br>5 | 49.1<br>4 |

Suppl. Table 5 The crude incidence of CTS by age and gender

| Incidence by age and gender | 1993  | 1994  | 1995  | 1996  | 1997  | 1998  | 1999  | 2000  | 2001  | 2002  | 2003  | 2004  | 2005  | 2006  | 2007  | 2008  | 2009  | 2010  | 2011  | 2012  | 2013  |
|-----------------------------|-------|-------|-------|-------|-------|-------|-------|-------|-------|-------|-------|-------|-------|-------|-------|-------|-------|-------|-------|-------|-------|
| Female 18-29                | 12.69 | 12.69 | 12.84 | 12.88 | 11.45 | 12.32 | 11.77 | 10.14 | 8.63  | 10.23 | 11.54 | 12.26 | 10.70 | 10.48 | 11.61 | 9.96  | 13.90 | 12.19 | 11.55 | 11.89 | 10.68 |
| Female 30-39                | 31.40 | 28.58 | 28.00 | 27.62 | 28.09 | 30.09 | 27.83 | 25.88 | 27.18 | 28.31 | 30.31 | 33.31 | 30.53 | 30.06 | 32.17 | 33.13 | 34.97 | 33.96 | 32.51 | 31.72 | 28.69 |
| Female 40-49                | 38.43 | 37.75 | 33.08 | 36.31 | 35.17 | 37.42 | 31.74 | 34.72 | 34.05 | 34.94 | 35.63 | 37.37 | 36.27 | 35.62 | 40.06 | 42.51 | 40.89 | 40.86 | 40.05 | 42.06 | 39.50 |
| Female 50-59                | 39.86 | 41.02 | 41.93 | 40.82 | 41.44 | 43.24 | 44.70 | 42.33 | 43.94 | 46.44 | 54.52 | 61.11 | 54.56 | 52.25 | 58.55 | 54.70 | 56.14 | 54.10 | 51.62 | 50.07 | 50.97 |
| Female 60-69                | 25.54 | 29.79 | 24.64 | 25.70 | 25.08 | 26.41 | 26.43 | 26.86 | 30.23 | 32.54 | 39.12 | 46.20 | 38.44 | 36.30 | 31.00 | 42.47 | 42.24 | 41.87 | 37.74 | 35.80 | 37.32 |
| Female 70+                  | 24.45 | 22.29 | 24.21 | 25.28 | 26.17 | 25.09 | 25.25 | 27.67 | 29.29 | 32.87 | 34.96 | 39.57 | 37.78 | 39.60 | 39.13 | 41.89 | 46.03 | 44.89 | 44.46 | 42.29 | 43.53 |
| Male 18-29                  | 3.58  | 3.69  | 3.09  | 3.02  | 2.32  | 2.29  | 2.35  | 1.44  | 2.24  | 2.75  | 2.60  | 3.14  | 2.60  | 2.58  | 3.33  | 3.13  | 2.77  | 3.00  | 3.56  | 3.51  | 3.35  |
| Male 30-39                  | 9.09  | 8.63  | 8.63  | 10.67 | 7.82  | 8.45  | 5.92  | 8.74  | 8.60  | 10.01 | 10.72 | 11.28 | 9.76  | 8.80  | 9.53  | 9.16  | 9.90  | 10.30 | 9.19  | 9.67  | 9.72  |
| Male 40-49                  | 14.23 | 14.35 | 12.63 | 11.83 | 11.86 | 12.41 | 13.43 | 13.26 | 14.39 | 16.32 | 16.08 | 17.78 | 14.28 | 14.25 | 16.36 | 18.23 | 17.76 | 19.58 | 17.15 | 18.13 | 17.63 |
| Male 50-59                  | 13.90 | 17.40 | 17.11 | 15.36 | 16.26 | 15.17 | 16.54 | 15.87 | 18.00 | 18.59 | 19.87 | 21.36 | 20.23 | 20.02 | 22.30 | 23.69 | 23.38 | 23.91 | 23.51 | 24.40 | 25.45 |
| Male 60-69                  | 13.62 | 15.14 | 11.42 | 12.22 | 13.02 | 13.48 | 15.58 | 15.96 | 18.78 | 18.49 | 19.80 | 23.71 | 21.12 | 21.81 | 23.95 | 24.79 | 27.56 | 23.24 | 24.59 | 27.90 | 26.23 |

1  
2  
3  
4  
5  
6  
7  
8  
9  
10  
11  
12  
13  
14  
15  
16  
17  
18  
19  
20  
21  
22  
23  
24  
25  
26  
27  
28  
29  
30  
31  
32  
33  
34  
35  
36  
37  
38  
39  
40  
41  
42  
43  
44  
45  
46

|          |       |       |       |       |       |       |       |       |       |       |       |       |       |       |       |       |       |       |       |       |       |
|----------|-------|-------|-------|-------|-------|-------|-------|-------|-------|-------|-------|-------|-------|-------|-------|-------|-------|-------|-------|-------|-------|
| Male 70+ | 14.88 | 18.38 | 15.72 | 16.64 | 18.34 | 18.06 | 17.29 | 19.27 | 20.53 | 21.95 | 24.71 | 27.24 | 27.92 | 26.94 | 29.67 | 31.84 | 33.81 | 32.52 | 33.23 | 33.78 | 33.83 |
|----------|-------|-------|-------|-------|-------|-------|-------|-------|-------|-------|-------|-------|-------|-------|-------|-------|-------|-------|-------|-------|-------|

For peer review only

Suppl. Table 6 Comparison of population studies reporting the prevalence and / or incidence of carpal tunnel syndrome

| Study Identifier                     | Study method                                                                                                                                                                                                                                                                                                                                                       | Definition of CTS                                                                                                                                                                                                                                                            | Comments                                                                                                                            |
|--------------------------------------|--------------------------------------------------------------------------------------------------------------------------------------------------------------------------------------------------------------------------------------------------------------------------------------------------------------------------------------------------------------------|------------------------------------------------------------------------------------------------------------------------------------------------------------------------------------------------------------------------------------------------------------------------------|-------------------------------------------------------------------------------------------------------------------------------------|
| De Krom et al. 1992                  | Survey of a random age sex stratified sample of the general population taken from the population register of Maastricht between 1983 and 1985                                                                                                                                                                                                                      | Questionnaire based on symptoms and signs                                                                                                                                                                                                                                    | [1]                                                                                                                                 |
| Ferry et al. 1998                    | <p>i) Cross sectional survey to estimate the point prevalence of hand symptoms (from a random sample of 1000 individuals from the UK general population, aged 18 to 75 years) and</p> <p>ii) nerve conduction testing of a weighted sample</p> <ul style="list-style-type: none"> <li>- Circa. 1998 (not stated)</li> <li>- point prevalence determined</li> </ul> | Based on nerve conduction studies using defined cut offs                                                                                                                                                                                                                     | Subjects over 54yrs had a higher prevalence than younger participants. No difference between genders was noted.[2]                  |
| Nordstrom et al. 1998                | Prospective study conducted in the general population of the Marshfield Epidemiologic Study Area, Wisconsin, between 1991 and 1993                                                                                                                                                                                                                                 | <ol style="list-style-type: none"> <li>1. any diagnosis of possible, probable or definite CTS;</li> <li>2. any diagnosis of probable or definite CTS; and</li> <li>3. any diagnosis of possible, probable or definite CTS plus at least one of six clinical signs</li> </ol> | A 3.5 fold increase in CTS incidence was noted compared with data from 20 years previously in the same study population[3]          |
| Atroshi et al. 2000                  | Survey of a random sample of the age sex stratified general population of Southern Sweden, in 1997                                                                                                                                                                                                                                                                 | Diagnosis based on clinical examination and positive electrophysiological findings                                                                                                                                                                                           | The population prevalence of symptoms was 14.4%; the prevalence of clinically and electrophysiologically confirmed CTS was 2.7% [4] |
| Papanicolaou, McCable & Firrell 2001 | Cross-sectional study to evaluate prevalence of carpal tunnel syndrome in the General population of the United States                                                                                                                                                                                                                                              | Katz hand diagram                                                                                                                                                                                                                                                            | After correcting for nonresponders the lowest possible estimate of CTS was 3.72% [5]                                                |

|    |                               |                                        |                                          |                                               |
|----|-------------------------------|----------------------------------------|------------------------------------------|-----------------------------------------------|
| 1  |                               |                                        |                                          |                                               |
| 2  |                               |                                        |                                          |                                               |
| 3  |                               |                                        |                                          |                                               |
| 4  | Mondelli, Giannini & Giacchi  | Prospective study of patients          | Diagnosis based on clinical history      | Of the patients presenting 79.7% were         |
| 5  | 2002                          | referred to four electrodiagnostic     | and electrodiagnostic evidence of a      | women. The mean age at diagnosis was          |
| 6  |                               | laboratories in the Siena area, Italy. | reduced distal conduction velocity of    | 55.0 +/- 14.4 years (range 16 to 97) [6]      |
| 7  |                               | Mean annual incidence calculated       | the median nerve (American               |                                               |
| 8  |                               | from time period 1991 to 1998          | Academy of Neurology standards)          |                                               |
| 9  |                               |                                        |                                          |                                               |
| 10 | Bland, Rudolfer 2003          | Prospective collection of              | Based on nerve conduction studies        | An increase in diagnosed cases was            |
| 11 |                               | neurophysiological and clinical data   | using defined cut offs                   | observed between the two data                 |
| 12 |                               | of patients referred to two            |                                          | collection periods; attributed to referral of |
| 13 |                               | electromyography clinics in the UK     |                                          | milder cases. Median nerve impairment         |
| 14 |                               | between 1991 to 1993 and 1992 to       |                                          | was more severe in the elderly and men        |
| 15 |                               | 2001                                   |                                          | at all ages. [7]                              |
| 16 |                               |                                        |                                          |                                               |
| 17 | Latinovic, Gulliford & Hughes | Population study based in a general    | Read and Oxmis codes for carpal          | Most frequent in women aged 45-54. In         |
| 18 | 2006                          | practice database of consulting        | tunnel syndrome                          | 2000 operative treatment was                  |
| 19 |                               | primary care patients from 253         |                                          | undertaken for 31% of incident CTS            |
| 20 |                               | practices between January 1992         |                                          | presentations [8]                             |
| 21 |                               | and 31 December 2000.                  |                                          |                                               |
| 22 |                               |                                        |                                          |                                               |
| 23 | Bonger et al. 2007            | Analysis of the first and second       | (International Classification of Primary | A crude increase in incidence over time       |
| 24 |                               | Dutch National Survey of General       | Care) ICPC coded diagnosis               | was not statistically significant after       |
| 25 |                               | Practice, conducted in 1987 and        |                                          | subdividing by age and sex. Incidence         |
| 26 |                               | 2001                                   |                                          | rates were related to the job level in        |
| 27 |                               |                                        |                                          | women, but not men [9]                        |
| 28 |                               |                                        |                                          |                                               |
| 29 | Dieleman et al. 2008          | Population study based in a general    | ICPC coded diagnosis                     | Neuropathic pain was noted to affect          |
| 30 |                               | practice database (Integrated          |                                          | almost 1% of the population.                  |
| 31 |                               | Primary Care Information (IPCI)        |                                          | Mononeuropathies and carpal tunnel            |
| 32 |                               | database): data of consulting          |                                          | syndrome were the most common                 |
| 33 |                               | primary care patients in the           |                                          | causes [10]                                   |
| 34 |                               | Netherlands between 1996 and           |                                          |                                               |
| 35 |                               | 2003                                   |                                          |                                               |
| 36 | Gelfman et al. 2009           | Analysis of medical records linkage    | Clinical coding with a sample verified   | An increase in incidence was observed         |
| 37 |                               | system 1981-1985 to 2000-2005 of       | by full record review                    | over the study period. An increase in         |
| 38 |                               | residents of Olmsted County,           |                                          | young individuals seeking care for less       |
| 39 |                               | Minnesota (Rochester Epidemiology      |                                          | severe CTS in the mid-1980's was              |
| 40 |                               | Project)                               |                                          | followed in the 1990's by an increasing       |
| 41 |                               |                                        |                                          | incidence in older people [11]                |
| 42 |                               |                                        |                                          |                                               |
| 43 |                               |                                        |                                          |                                               |
| 44 |                               |                                        |                                          |                                               |
| 45 |                               |                                        |                                          |                                               |
| 46 |                               |                                        |                                          |                                               |

|    |                      |                                                                                                                                                             |                                                                                                                                                                         |                                                                                                                                                                                                                                                                                                                                             |
|----|----------------------|-------------------------------------------------------------------------------------------------------------------------------------------------------------|-------------------------------------------------------------------------------------------------------------------------------------------------------------------------|---------------------------------------------------------------------------------------------------------------------------------------------------------------------------------------------------------------------------------------------------------------------------------------------------------------------------------------------|
| 1  |                      |                                                                                                                                                             |                                                                                                                                                                         |                                                                                                                                                                                                                                                                                                                                             |
| 2  |                      |                                                                                                                                                             |                                                                                                                                                                         |                                                                                                                                                                                                                                                                                                                                             |
| 3  |                      |                                                                                                                                                             |                                                                                                                                                                         |                                                                                                                                                                                                                                                                                                                                             |
| 4  | Atroschi et al. 2011 | Analysis of the Skane Health Care Register (SCHR) (inhabitants presenting to public health providers), incident cases identified between 2006 - 2008        | Physician diagnosed                                                                                                                                                     | [12]                                                                                                                                                                                                                                                                                                                                        |
| 5  |                      |                                                                                                                                                             |                                                                                                                                                                         |                                                                                                                                                                                                                                                                                                                                             |
| 6  | Jenkins et al. 2012b | Prospective audit of patients referred to a regional hand service based in secondary care in Scotland between November 2004 and May 2010                    | Symptoms of pain or paraesthesia in the median nerve distribution and one or more of: nerve conduction deficit, thenar muscle wasting or positive Tinel or Phalen signs | Mean age of presentation 55.1 years (range 22 to 96, SD 13.5 years). Mean body mass index at presentation 29.5 kg/m <sup>2</sup> CTS more common in: females (OR 1.9, 95% CI 1.5 to 2.5) Incidence varied significantly between deprivation groups: most deprived 81/100,000 and least deprived 62/100,000 (OR 1.3, 95% CI 1.1 to 1.6) [13] |
| 7  |                      |                                                                                                                                                             |                                                                                                                                                                         |                                                                                                                                                                                                                                                                                                                                             |
| 8  |                      |                                                                                                                                                             |                                                                                                                                                                         |                                                                                                                                                                                                                                                                                                                                             |
| 9  |                      |                                                                                                                                                             |                                                                                                                                                                         |                                                                                                                                                                                                                                                                                                                                             |
| 10 |                      |                                                                                                                                                             |                                                                                                                                                                         |                                                                                                                                                                                                                                                                                                                                             |
| 11 | Jenkins et al. 2013  | Prospective audit of patients referred to a regional hand service based in secondary care in Scotland between November 2004 and May 2010, who were employed | Clinical diagnosis based on history and examination, in most cases substantiated by nerve conduction studies                                                            | The greatest incidence as in caring and leisure occupations (197 per 100,000) and the lowest incidence was in the associate professional group (37 per 100,000) [14]                                                                                                                                                                        |
| 12 |                      |                                                                                                                                                             |                                                                                                                                                                         |                                                                                                                                                                                                                                                                                                                                             |
| 13 |                      |                                                                                                                                                             |                                                                                                                                                                         |                                                                                                                                                                                                                                                                                                                                             |
| 14 |                      |                                                                                                                                                             |                                                                                                                                                                         |                                                                                                                                                                                                                                                                                                                                             |
| 15 |                      |                                                                                                                                                             |                                                                                                                                                                         |                                                                                                                                                                                                                                                                                                                                             |
| 16 |                      |                                                                                                                                                             |                                                                                                                                                                         |                                                                                                                                                                                                                                                                                                                                             |
| 17 |                      |                                                                                                                                                             |                                                                                                                                                                         |                                                                                                                                                                                                                                                                                                                                             |
| 18 |                      |                                                                                                                                                             |                                                                                                                                                                         |                                                                                                                                                                                                                                                                                                                                             |
| 19 |                      |                                                                                                                                                             |                                                                                                                                                                         |                                                                                                                                                                                                                                                                                                                                             |
| 20 |                      |                                                                                                                                                             |                                                                                                                                                                         |                                                                                                                                                                                                                                                                                                                                             |
| 21 |                      |                                                                                                                                                             |                                                                                                                                                                         |                                                                                                                                                                                                                                                                                                                                             |
| 22 |                      |                                                                                                                                                             |                                                                                                                                                                         |                                                                                                                                                                                                                                                                                                                                             |
| 23 |                      |                                                                                                                                                             |                                                                                                                                                                         |                                                                                                                                                                                                                                                                                                                                             |
| 24 |                      |                                                                                                                                                             |                                                                                                                                                                         |                                                                                                                                                                                                                                                                                                                                             |
| 25 |                      |                                                                                                                                                             |                                                                                                                                                                         |                                                                                                                                                                                                                                                                                                                                             |
| 26 | Dale 2013            | Pooled analysis of six prospective studies collecting data from >50 workplaces, over variable time frames                                                   | A pooled case definition was derived to include clinical and electrodiagnostic criteria                                                                                 | 7.8% of 4321 subjects studied had prevalent CTS, with an additional 204 subjects meeting the CTS criteria, leading to an incidence of 2.3 cases per 100 person years [15]                                                                                                                                                                   |
| 27 |                      |                                                                                                                                                             |                                                                                                                                                                         |                                                                                                                                                                                                                                                                                                                                             |
| 28 |                      |                                                                                                                                                             |                                                                                                                                                                         |                                                                                                                                                                                                                                                                                                                                             |
| 29 |                      |                                                                                                                                                             |                                                                                                                                                                         |                                                                                                                                                                                                                                                                                                                                             |
| 30 |                      |                                                                                                                                                             |                                                                                                                                                                         |                                                                                                                                                                                                                                                                                                                                             |
| 31 |                      |                                                                                                                                                             |                                                                                                                                                                         |                                                                                                                                                                                                                                                                                                                                             |

1 de Krom MC, Knipschild PG, Kester AD, et al. Carpal tunnel syndrome: prevalence in the general population. *J Clin Epidemiol* 1992;45:373-6.

2 Ferry S, Pritchard T, Keenan J, et al. Estimating the prevalence of delayed median nerve conduction in the general population. *Br J Rheumatol* 1998;37:630-5.

3 Nordstrom DL, DeStefano F, Vierkant RA, et al. Incidence of diagnosed carpal tunnel syndrome in a general population. *Epidemiology* 1998;9:342-5.



- 1  
2  
3 4 Atroshi I. Carpal tunnel syndrome--prevalence, electrodiagnosis and outcome instruments. *Acta Orthop Scand* 1999;70:70-1.  
4  
5 5 Papanicolaou GD, McCabe SJ, Firrell J. The prevalence and characteristics of nerve compression symptoms in the general population. *Journal of Hand*  
6 *Surgery - American Volume* 2001;26:460-6.  
7  
8 6 Mondelli M, Giannini F, Giacchi M. Carpal tunnel syndrome incidence in a general population. *Neurology* 2002;58:289-94.  
9  
10 7 Bland JDP, Rudolfer SM. Clinical surveillance of carpal tunnel syndrome in two areas of the United Kingdom, 1991–2001. *Journal of Neurology,*  
11 *Neurosurgery & Psychiatry* 2003;74:1674-9 doi:10.1136/jnnp.74.12.1674.  
12  
13 8 Latinovic R, Gulliford MC, Hughes RA. Incidence of common compressive neuropathies in primary care. *J Neurol Neurosurg Psychiatry* 2006;77:263-5  
14 doi:10.1136/jnnp.2005.066696.  
15  
16 9 Bongers FJ, Schellevis FG, van den Bosch WJ, et al. Carpal tunnel syndrome in general practice (1987 and 2001): incidence and the role of occupational and  
17 non-occupational factors. *Br J Gen Pract* 2007;57:36-9.  
18  
19 10 Dieleman JP, Kerklaan J, Huygen FJ, et al. Incidence rates and treatment of neuropathic pain conditions in the general population. *Pain* 2008;137:681-8  
20 doi:10.1016/j.pain.2008.03.002 [doi].  
21  
22 11 Gelfman R, Melton LJ, 3rd, Yawn BP, et al. Long-term trends in carpal tunnel syndrome. *Neurology* 2009;72:33-41  
23 doi:10.1212/01.wnl.0000338533.88960.b9; 10.1212/01.wnl.0000338533.88960.b9.  
24  
25 12 Atroshi I, Englund M, Turkiewicz A, et al. Incidence of physician-diagnosed carpal tunnel syndrome in the general population. *Arch Intern Med*  
26 2011;171:943-5.  
27  
28 13 Jenkins PJ, Watts AC, Duckworth AD, et al. Socioeconomic deprivation and the epidemiology of carpal tunnel syndrome. *Journal of Hand Surgery-*  
29 *European Volume* 2012;37E:123-9 doi:10.1177/1753193411419952.  
30  
31 14 Jenkins PJ, Srikantharajah D, Duckworth AD, et al. Carpal tunnel syndrome: the association with occupation at a population level. *Journal of Hand*  
32 *Surgery-European Volume* 2013;38E:67-72 doi:10.1177/1753193412455790.  
33  
34 15 Dale AM, Harris-Adamson C, Rempel D, et al. Prevalence and incidence of carpal tunnel syndrome in US working populations: Pooled analysis of six  
35 prospective studies. *Scandinavian Journal of Work, Environment and Health* 2013;39:495-505.  
36  
37  
38  
39  
40  
41  
42  
43  
44  
45  
46

1  
2  
3  
4  
5  
6  
7  
8  
9  
10  
11  
12  
13  
14  
15  
16  
17  
18  
19  
20  
21  
22  
23  
24  
25  
26  
27  
28  
29  
30  
31  
32  
33  
34  
35  
36  
37  
38  
39  
40  
41  
42  
43  
44  
45  
46

For peer review only

Suppl. Table 7 summary of reported prevalence and incidence by gender

| Study Identifier                        | Country of Origin<br>Data collection<br>(Prevalence or<br>Incidence) | Prevalence or<br>Incidence per<br>100,000, per annum |        |      | Female / male ratio |
|-----------------------------------------|----------------------------------------------------------------------|------------------------------------------------------|--------|------|---------------------|
|                                         |                                                                      | All                                                  | Female | Male |                     |
| De Krom et al. 1992                     | The Netherlands<br>1983 - July 1985<br>(Prevalence)                  | 5700                                                 | 5800   | 600  | 9.66                |
| Atroshi et al. 2000                     | Sweden<br>1997<br>(Prevalence)                                       | 3800                                                 | 4600   | 2800 | 1.64                |
| Papanicolaou,<br>McCable & Firrell 2001 | United States<br>2001<br>(Prevalence)                                | 3720                                                 |        |      | 4.8                 |
| Ferry et al. 1998                       | United Kingdom<br>Not stated<br>(Incidence)                          | 8200                                                 | 6400   | 8200 | 0.78                |
| Nordstrom et al. 1998                   | United States<br>1991 - 1993<br>(Incidence)                          | 346                                                  | 373    | 318  | 1.17                |
| Mondelli, Giannini &<br>Giacchi 2002    | Italy<br>1991 – 1998 (mean)<br>(Incidence)                           | 276                                                  | 506    | 139  | 3.64                |
| Bland, Rudolfer 2003                    | Kent, UK<br>1991 - 2001<br>(Incidence)                               | 105                                                  | 120.5  | 60   | 2                   |
|                                         | Huddersfield, UK                                                     |                                                      | 61.5   | 30   | 2                   |

1  
2  
3  
4  
5  
6  
7  
8  
9  
10  
11  
12  
13  
14  
15  
16  
17  
18  
19  
20  
21  
22  
23  
24  
25  
26  
27  
28  
29  
30  
31  
32  
33  
34  
35  
36  
37  
38  
39  
40  
41  
42  
43  
44  
45  
46

---

|                                    |                                         |       |       |      |      |
|------------------------------------|-----------------------------------------|-------|-------|------|------|
| Latinovic, Gulliford & Hughes 2006 | United Kingdom (Incidence)              |       | 192.8 | 87.8 | 2.23 |
| Bongers et al. 2007                | The Netherlands (Incidence) 1987        | 130   | 190   | 60   | 3.17 |
|                                    | 2001                                    | 180   | 280   | 90   | 3.11 |
| Dieleman et al. 2008               | The Netherlands 1996 - 2003 (Incidence) | 233.1 |       |      |      |
| Gelfman et al. 2009                | United States (Incidence) 1981-1985     | 258   | 337   | 177  | 1.90 |
|                                    | 2001-2005                               | 424   | 542   | 303  | 1.79 |
| Atroshi et al. 2011                | Sweden 2006 - 2008 (Incidence)          |       | 428   | 182  | 2.35 |
| Jenkins et al. 2012b               | Scotland 2004 - 2010 (Incidence)        | 72    | 98    | 43   | 2.28 |
| Jenkins et al. 2013                | Scotland 2004 - 2010 (Incidence)        | 103   |       |      |      |
| Dale 2013                          | United States (Incidence)               | 2300  |       |      |      |

---

## STROBE Statement—checklist of items that should be included in reports of observational studies

|                              | Item No | Recommendation                                                                                                                                                                                                                                                                                                                                                                                                                                                         | Page |
|------------------------------|---------|------------------------------------------------------------------------------------------------------------------------------------------------------------------------------------------------------------------------------------------------------------------------------------------------------------------------------------------------------------------------------------------------------------------------------------------------------------------------|------|
| <b>Title and abstract</b>    | 1       | (a) Indicate the study's design with a commonly used term in the title or the abstract                                                                                                                                                                                                                                                                                                                                                                                 | 1-2  |
|                              |         | (b) Provide in the abstract an informative and balanced summary of what was done and what was found                                                                                                                                                                                                                                                                                                                                                                    | 1-2  |
| <b>Introduction</b>          |         |                                                                                                                                                                                                                                                                                                                                                                                                                                                                        |      |
| Background/rationale         | 2       | Explain the scientific background and rationale for the investigation being reported                                                                                                                                                                                                                                                                                                                                                                                   | 4    |
| Objectives                   | 3       | State specific objectives, including any prespecified hypotheses                                                                                                                                                                                                                                                                                                                                                                                                       | 4-5  |
| <b>Methods</b>               |         |                                                                                                                                                                                                                                                                                                                                                                                                                                                                        |      |
| Study design                 | 4       | Present key elements of study design early in the paper                                                                                                                                                                                                                                                                                                                                                                                                                | 5    |
| Setting                      | 5       | Describe the setting, locations, and relevant dates, including periods of recruitment, exposure, follow-up, and data collection                                                                                                                                                                                                                                                                                                                                        | 5-6  |
| Participants                 | 6       | (a) <i>Cohort study</i> —Give the eligibility criteria, and the sources and methods of selection of participants. Describe methods of follow-up<br><i>Case-control study</i> —Give the eligibility criteria, and the sources and methods of case ascertainment and control selection. Give the rationale for the choice of cases and controls<br><i>Cross-sectional study</i> —Give the eligibility criteria, and the sources and methods of selection of participants | 5-6  |
|                              |         | (b) <i>Cohort study</i> —For matched studies, give matching criteria and number of exposed and unexposed<br><i>Case-control study</i> —For matched studies, give matching criteria and the number of controls per case                                                                                                                                                                                                                                                 |      |
| Variables                    | 7       | Clearly define all outcomes, exposures, predictors, potential confounders, and effect modifiers. Give diagnostic criteria, if applicable                                                                                                                                                                                                                                                                                                                               | 5-6  |
| Data sources/<br>measurement | 8*      | For each variable of interest, give sources of data and details of methods of assessment (measurement). Describe comparability of assessment methods if there is more than one group                                                                                                                                                                                                                                                                                   | na   |
| Bias                         | 9       | Describe any efforts to address potential sources of bias                                                                                                                                                                                                                                                                                                                                                                                                              | na   |
| Study size                   | 10      | Explain how the study size was arrived at                                                                                                                                                                                                                                                                                                                                                                                                                              | na   |
| Quantitative variables       | 11      | Explain how quantitative variables were handled in the analyses. If applicable, describe which groupings were chosen and why                                                                                                                                                                                                                                                                                                                                           | 6-7  |
| Statistical methods          | 12      | (a) Describe all statistical methods, including those used to control for confounding                                                                                                                                                                                                                                                                                                                                                                                  | 6-7  |
|                              |         | (b) Describe any methods used to examine subgroups and interactions                                                                                                                                                                                                                                                                                                                                                                                                    | na   |
|                              |         | (c) Explain how missing data were addressed                                                                                                                                                                                                                                                                                                                                                                                                                            | na   |
|                              |         | (d) <i>Cohort study</i> —If applicable, explain how loss to follow-up was addressed<br><i>Case-control study</i> —If applicable, explain how matching of cases and controls was addressed<br><i>Cross-sectional study</i> —If applicable, describe analytical methods taking account of sampling strategy                                                                                                                                                              | na   |
|                              |         | (e) Describe any sensitivity analyses                                                                                                                                                                                                                                                                                                                                                                                                                                  | 6-7  |

Continued on next page.

**Results**

|                   |     |                                                                                                                                                                                                              |             |
|-------------------|-----|--------------------------------------------------------------------------------------------------------------------------------------------------------------------------------------------------------------|-------------|
| Participants      | 13* | (a) Report numbers of individuals at each stage of study—eg numbers potentially eligible, examined for eligibility, confirmed eligible, included in the study, completing follow-up, and analysed            | Na          |
|                   |     | (b) Give reasons for non-participation at each stage                                                                                                                                                         | Na          |
|                   |     | (c) Consider use of a flow diagram                                                                                                                                                                           | Na          |
| -Descriptive data | 14* | (a) Give characteristics of study participants (eg demographic, clinical, social) and information on exposures and potential confounders                                                                     | 7-9         |
|                   |     | (b) Indicate number of participants with missing data for each variable of interest                                                                                                                          | na          |
|                   |     | (c) <i>Cohort study</i> —Summarise follow-up time (eg, average and total amount)                                                                                                                             | na          |
| Outcome data      | 15* | <i>Cohort study</i> —Report numbers of outcome events or summary measures over time                                                                                                                          |             |
|                   |     | <i>Case-control study</i> —Report numbers in each exposure category, or summary measures of exposure                                                                                                         |             |
|                   |     | <i>Cross-sectional study</i> —Report numbers of outcome events or summary measures                                                                                                                           | 7-9         |
| Main results      | 16  | (a) Give unadjusted estimates and, if applicable, confounder-adjusted estimates and their precision (eg, 95% confidence interval). Make clear which confounders were adjusted for and why they were included | 7-9+ tables |
|                   |     | (b) Report category boundaries when continuous variables were categorized                                                                                                                                    | na          |
|                   |     | (c) If relevant, consider translating estimates of relative risk into absolute risk for a meaningful time period                                                                                             | na          |
| Other analyses    | 17  | Report other analyses done—eg analyses of subgroups and interactions, and sensitivity analyses                                                                                                               | na          |

**Discussion**

|                  |    |                                                                                                                                                                            |       |
|------------------|----|----------------------------------------------------------------------------------------------------------------------------------------------------------------------------|-------|
| Key results      | 18 | Summarise key results with reference to study objectives                                                                                                                   | 12    |
| Limitations      | 19 | Discuss limitations of the study, taking into account sources of potential bias or imprecision. Discuss both direction and magnitude of any potential bias                 | 14    |
| Interpretation   | 20 | Give a cautious overall interpretation of results considering objectives, limitations, multiplicity of analyses, results from similar studies, and other relevant evidence | 12-15 |
| Generalisability | 21 | Discuss the generalisability (external validity) of the study results                                                                                                      | 14    |

**Other information**

|         |    |                                                                                                                                                               |    |
|---------|----|---------------------------------------------------------------------------------------------------------------------------------------------------------------|----|
| Funding | 22 | Give the source of funding and the role of the funders for the present study and, if applicable, for the original study on which the present article is based | 15 |
|---------|----|---------------------------------------------------------------------------------------------------------------------------------------------------------------|----|

\*Give information separately for cases and controls in case-control studies and, if applicable, for exposed and unexposed groups in cohort and cross-sectional studies.

**Note:** An Explanation and Elaboration article discusses each checklist item and gives methodological background and published examples of transparent reporting. The STROBE checklist is best used in conjunction with this article (freely available on the Web sites of PLoS Medicine at <http://www.plosmedicine.org/>, Annals of Internal Medicine at <http://www.annals.org/>, and Epidemiology at <http://www.epidem.com/>). Information on the STROBE Initiative is available at [www.strobe-statement.org](http://www.strobe-statement.org).

# BMJ Open

## Trends in the prevalence, incidence and surgical management of carpal tunnel syndrome between 1993 and 2013: an observational analysis of UK primary care records

|                                 |                                                                                                                                                                                                                                                                                                                                                                                                                                                                                                                                                              |
|---------------------------------|--------------------------------------------------------------------------------------------------------------------------------------------------------------------------------------------------------------------------------------------------------------------------------------------------------------------------------------------------------------------------------------------------------------------------------------------------------------------------------------------------------------------------------------------------------------|
| Journal:                        | <i>BMJ Open</i>                                                                                                                                                                                                                                                                                                                                                                                                                                                                                                                                              |
| Manuscript ID                   | bmjopen-2017-020166.R2                                                                                                                                                                                                                                                                                                                                                                                                                                                                                                                                       |
| Article Type:                   | Research                                                                                                                                                                                                                                                                                                                                                                                                                                                                                                                                                     |
| Date Submitted by the Author:   | 24-Apr-2018                                                                                                                                                                                                                                                                                                                                                                                                                                                                                                                                                  |
| Complete List of Authors:       | Burton, Claire; Keele University, Arthritis Research UK Primary Care Centre, Research Institute for Primary Care & Health Sciences<br>Chen, Ying; Keele University, Arthritis Research UK Primary Care Centre, Research Institute for Primary Care & Health Sciences<br>Chesterton, Linda; Keele University, Arthritis Research UK Primary Care Centre, Research Institute for Primary Care & Health Sciences<br>van der Windt, Danielle; Keele University, Arthritis Research UK Primary Care Centre, Research Institute for Primary Care & Health Sciences |
| <b>Primary Subject Heading</b>: | Epidemiology                                                                                                                                                                                                                                                                                                                                                                                                                                                                                                                                                 |
| Secondary Subject Heading:      | Rheumatology, General practice / Family practice                                                                                                                                                                                                                                                                                                                                                                                                                                                                                                             |
| Keywords:                       | PRIMARY CARE, SURGERY, Musculoskeletal disorders < ORTHOPAEDIC & TRAUMA SURGERY, Hand & wrist < ORTHOPAEDIC & TRAUMA SURGERY                                                                                                                                                                                                                                                                                                                                                                                                                                 |
|                                 |                                                                                                                                                                                                                                                                                                                                                                                                                                                                                                                                                              |

SCHOLARONE™  
Manuscripts

only

1  
2  
3 **Trends in the prevalence, incidence and surgical management of carpal tunnel**  
4 **syndrome between 1993 and 2013: an observational analysis of UK primary care**  
5 **records**  
6  
7

8  
9 **Authors**  
10

11 Claire L. Burton<sup>a</sup> [c.burton@keele.ac.uk](mailto:c.burton@keele.ac.uk) GP Research Fellow

12  
13 Ying Chen<sup>a</sup> Research<sup>a</sup> Research Associate in Biostatistics

14  
15 Linda S. Chesterton<sup>a</sup> Senior Lecturer in Physiotherapy

16  
17 Danielle A. van der Windt<sup>a</sup> Professor of Primary Care Epidemiology

18 <sup>a</sup> Arthritis Research UK Primary Care Centre, Research Institute for Primary Care & Health  
19 Sciences, Keele University, Staffordshire, England. ST5 5BG

20  
21 Word count (excluding title page, abstract, references, figures and tables) 4460

22  
23 Correspondence to: Dr Claire L Burton [c.burton@keele.ac.uk](mailto:c.burton@keele.ac.uk)  
24  
25  
26  
27  
28  
29  
30  
31  
32  
33  
34  
35  
36  
37  
38  
39  
40  
41  
42  
43  
44  
45  
46  
47  
48  
49  
50  
51  
52  
53  
54  
55  
56  
57  
58  
59  
60



## Abstract

### Objectives

To describe the prevalence, incidence and surgical management of carpal tunnel syndrome (CTS), between 1993 and 2013, as recorded in the Clinical Practice Research Datalink (CPRD)

### Design

We completed a series of cross-sectional epidemiological analyses to observe trends over time.

### Setting

Primary care data collected between 1993 and 2013, stored in the Clinical Practice Research Datalink

### Population

Individuals  $\geq 18$  years were selected. Prevalent and incident episodes of Carpal Tunnel syndrome (CTS) and episodes surgical intervention were identified using a list of pre-identified Read codes.

### Analysis

We defined incident episodes as those with no preceding diagnostic code for CTS in the past 2 years of data. Episodes of surgery were expressed as a percentage of the prevalent population during the same calendar year. Joinpoint regression was used to determine significant changes in the underlying trend.

### Results

The prevalence of CTS increased over the study period, with a particular incline between 2000 and 2004 (annual percentage change 7.81). The female to male prevalence ratio reduced over time from 2.74 in 1993 to 1.93 in 2013. The median age of females and males with CTS were noted to increase from 49 and 53 years respectively in 1993 to 54 and 59 years respectively in 2013. Incidence was also noted to increase over time. After an initial increase between 1993 and 2007, the percentage of prevalent patients with a coded surgical episode began to decrease after 2007 to 27.41% in 2013 (annual percentage change -1.7)

### Conclusion

This study has demonstrated that the prevalence and incidence of carpal tunnel syndrome increased over the study period between 1993 and 2013. Rates of surgery for CTS also increased over the study period, however after 2007, the percent of patients receiving surgery showed a statistically significant decline back to the rate seen in 2004.

## Key words

Carpal tunnel syndrome; primary care; epidemiology; incidence; prevalence; surgery

1  
2  
3  
4  
5  
6  
7  
8  
9  
10  
11  
12  
13  
14  
15  
16  
17  
18  
19  
20  
21  
22  
23  
24  
25  
26  
27  
28  
29  
30  
31  
32  
33  
34  
35  
36  
37  
38  
39  
40  
41  
42  
43  
44  
45  
46  
47  
48  
49  
50  
51  
52  
53  
54  
55  
56  
57  
58  
59  
60

**Strengths and Limitations**

- Provides updated epidemiological data about a common and bothersome condition
- Set in primary care, where most cases of carpal tunnel syndrome present
- Utilises a large primary care database, generalizable to the UK population
- Relies on the correct coding and capture of episodes of carpal tunnel syndrome and carpal tunnel release surgery

For peer review only

## INTRODUCTION

Carpal tunnel syndrome (CTS) is a chronic focal compressive neuropathy caused by the entrapment of the median nerve at the level of the carpal tunnel in the wrist.[1] CTS is the most common presentation of the entrapment neuropathies [2] and is characterised by symptoms including paraesthesia, dysesthesia, sensory loss and eventually weakness and atrophy of the thenar muscle. Symptoms are usually localised to the hand but can spread proximally to the forearm, upper arm and even shoulder.[3] Despite causing relatively localised symptoms, CTS can have substantial physical, psychological and economic consequences.[4, 5] In some cases, there may be associations with certain occupations (such as the care and leisure industry)[6] which involve the overuse of the hand and wrist as well as other physical comorbidities including: pregnancy; diabetes; hypothyroidism and obesity.[7]

The diagnosis of CTS is generally accepted to be a clinical one (based on history and examination findings) [8], although electrodiagnostic tests are commonly requested to confirm the diagnosis or differentiate among diagnoses, especially in the presence of thenar atrophy and / or persistent numbness or if surgical management is being considered.[9] The treatment of CTS is usually defined as either surgical or conservative (non-surgical). Local steroid injections and night splinting form the mainstay of primary care interventions in carpal tunnel syndrome, as indicated by national care pathways.[10, 11] Patients with moderate, severe or deteriorating symptoms following conservative treatment or sudden and severe symptoms are recommended to be referred for consideration of surgery.[12] Carpal tunnel release surgery (CTR) is routinely carried out under local anaesthetic as day surgery. Open and endoscopic approaches are used to release the flexor retinaculum.[13] Previous studies have sought to estimate the prevalence and / or incidence of CTS. Such epidemiological studies have been diverse in their approach to the populations studied and case definitions applied.[14] The reported estimates for annual prevalence range from 3720-5700 per 100,000 per year [15-17] and the reported incidence from 72 – 8200 per 100,000 per year.[6, 14, 18-23] CTS is generally accepted to be more common in women; the female to male ratio ranges between 0.78 and 9.66 [14, 15] A number of previous studies have observed the trends of prevalence or incidence over time and identified an increase [19, 20, 24], with 2005 being the latest data collection point. The most recent primary care based study in the UK utilised data from between 1992 and 2000.[18]

Episodes of CTR have also been shown to have increased, with audit data from one major tertiary UK Hand Centre suggesting that referral for CTR increased over a 10 year period from 59.7 to 112 per 100,000 population per year between 1989-9 and 2000-1.[25] Using Hospital Episode Statistics (HES) between 1998 and 2011, Bebbington and Furniss also observed an increase in the absolute number of patients with CTS and episodes of CTR, however they also noted a decrease in the use of surgery post 2008.[26]

Previous studies have used a range of methods to classify episodes of CTS and have been conducted in a number of population settings. CTS is essentially a clinical diagnosis, and in the UK, the majority of patients will first present to and be managed within primary care. Only a proportion of these patients will be referred into more specialised services and since not all surgical episodes will take place in secondary care (hospitals), as community clinics are now receiving referrals, primary care records should capture the majority of episodes. Data from a high quality source, representative of the UK population is necessary to support the planning and commissioning of services.

The aim of this study is therefore to provide updated estimates of the prevalence, incidence and surgical management of carpal tunnel syndrome and describe trends over a 20 year period, using data from a large national primary care database (Clinical Practice Research Datalink (CPRD)).

## METHODS

This was an observational study using the Clinical Practice Research Datalink (CPRD) to estimate the prevalence, incidence and surgical management of CTS from 1993 to 2013. CPRD is a live, primary care database of anonymised medical records from general practices. It holds information of over 11.3 million patients from 674 practices in the UK since 1987. 4.4 million active (alive and currently registered) patients are currently contributing information to the datalink, which equates to 6.9% of the UK population. [27] CPRD is broadly representative of the UK general population in terms of age, gender and ethnicity. [27] The CPRD has National Research Ethics Committee (NRES) approval for observational research using primary care data and as such no further permissions were required. The Independent Scientific Advisory Committee (ISAC) study protocol 14\_167 was approved in September 2014.

During clinical interactions, Read Codes are used to record signs and symptoms, treatments and therapies, investigations, occupations, diagnoses and appliances. Read codes make up a hierarchical 'thesaurus' stored by the computer. Clinical information is hence stored in a retrievable and analysable format.[28]

The study population consisted of men and women over 18 years of age. Data was used from practices which met a data quality standard based on continuity of recorded data, and from patients who had a record including at least their registration status, age and gender. These quality standards were required to have been met for at least two years prior to an incident episode and at the point of diagnosis for a prevalent episode.[27]

Prevalent and incident patients were identified by a consultation recorded using one of the Read codes listed in Table 1. Some treatment codes and in the case of injections, linked prescription data, were included as evidence of diagnosis as per previous studies.[18] Pilot work using a local primary care database (Consultations in Primary Care Archive, CiPCA [29]) had noted that 30% of CTS cases with a treatment code (i.e. CTR or a coded carpal tunnel injection) had not initially received a diagnosis code. This means that at presentation, patients may have been attributed a more generic term such as 'hand pain' and later gone on to receive condition specific treatment. Hence, treatment codes were used to capture such cases, which would be missed when using diagnostic codes only.

Table 1 Readcodes used to define a prevalent or incident episode of carpal tunnel syndrome

| Term                             | Read code |
|----------------------------------|-----------|
| Carpal tunnel syndrome           | F340      |
| Injection of carpal tunnel       | 85BE.00   |
| Carpal tunnel release            | 70560     |
| Endoscopic carpal tunnel release | 7056011   |
| Carpal tunnel decompression      | 70564     |

The prevalence of individuals consulting with CTS was calculated per annum. The numerator for prevalence was the number of patients with a record of a CTS diagnosis or evidence of an episode of CTR or a carpal tunnel injection (CTI), in each calendar year. In order to determine annual incidence, the numerator was the number of patients with a record

of CTS or evidence of CTR or CTI, without a prior record of these codes during a run-in-period of two years. This two year run-in period was based on expert consensus with the aim of estimating the period of time during which a new episode of CTS may develop. It was felt unlikely that a patient with ongoing bothersome symptoms would not have presented in primary care within this 2 year period. This however is an assumption made in order to define incident cases in this data set. It remains possible that patients had CTS in the community and did not present, presented in an alternative setting or indeed had a misdiagnosis / uncoded diagnosis made. CTS could present as a new episode in the contralateral wrist sometime after the initial presentation, hence it was not felt possible to define this criterion as 'no previous recorded episode'. All incidence patients were therefore required to have complete registration for this 2 calendar years prior to the event date. Pilot work in CiPCA had shown that over 9 years observed, 4% of potential incident cases were lost due to the lack of 2 years registration data required to define an incident episode.

The denominator population for calculation of prevalence was the total up-to-standard person-years contributed to CPRD by patients over the age of 18 years, for each annual period between 1993 and 2013. In order to apply the same criteria to both the numerator and denominator populations, the denominator populations for calculating incidence were also required to have registration at the mid-point of the year, two calendar years before the index year.

Episodes of carpal tunnel release (CTR) were identified using Read codes as shown in Table 2. In addition, codes used to define 're-release of carpal tunnel' and 'revision of carpal tunnel release' were included as a surgical episode (if first recorded). These terms were not included in the definition of CTS for the estimation of prevalence and incidence as they may not have indicated an episode of 'idiopathic' CTS but rather iatrogenic symptoms following previous (unsuccessful) surgery. Of note revision codes contributed 1.00% of the total surgical codes used. Results were expressed as the percentage of patients with a prevalent episode of CTS having a code of CTR in the same calendar year. Percentages were calculated based on the number of prevalent cases as opposed to incident cases as it was felt likely that patients would receive surgery in the annual period following their index consultation.

Table 2 Read codes used to define a surgical episode

| Term                              | Read code |
|-----------------------------------|-----------|
| Carpal tunnel release             | 817       |
| Re-release of carpal tunnel       | 16896     |
| Endoscopic carpal tunnel release  | 39335     |
| Revision of carpal tunnel release | 97195     |
| Carpal tunnel decompression       | 19249     |

## Statistical methods

Age and sex specific annual prevalence and incidence were determined for each calendar year, between 1993 and 2013 and presented as n / 10,000 person years. For confidence interval calculation a Poisson distribution was used. As a sensitivity analysis, age and sex standardised annual figures of CTS prevalence and incidence for each year were also calculated, using population estimates provided by the website of the Office of National Statistics.[30] Un-standardised and standardised rates were very similar, hence we report un-standardised rates as the primary outcome. The age and sex standardised estimates of the annual prevalence and incidence of CTS are shown in Supplementary Table 1.

1  
2  
3 Episodes of CTR were identified and the frequency in each calendar year expressed as a  
4 percentage of the prevalent population for the same time period. Emerging trends were  
5 described. Joinpoint regression was used to determine mean Annual Percentage Change  
6 (APC) and assess when significant changes ('joinpoints') occurred in the underlying trend for  
7 incidence, prevalence, and surgery. This method assists the exploration of the potential  
8 influence of changes in practice, although such potential associations cannot be proven.[31,  
9 32] Models were fitted using the JOINPOINT REGRESSION PROGRAM (version 4.3.1.0)  
10 and the best fitting model chosen (up to 5 joinpoints).

## 11 **Patient and Public Involvement**

12  
13 Patients were not directly involved in the design of this study, however the results will be  
14 used to inform discussions regarding further research in this field with our local Research  
15 User Group.  
16

## 17 **RESULTS**

### 18 **Trends in prevalence**

19  
20 Table 3 presents the prevalence (crude estimates) of patients presenting in primary care  
21 with carpal tunnel syndrome between 1993 and 2013 and the demographics of the  
22 population. The denominator population for prevalence increased from 1,117,433 person  
23 years in 1993 to 3,473,094 person years in 2013. The total prevalence in 1993 was 26.03  
24 per 10,000 person years (95% CI 25.10 – 27.00), and for 2013, 36.08 per 10,000 person  
25 years (95% CI 35.45 – 36.72). As shown in Figure 1 and corresponding Table 4, prevalence  
26 appeared to decrease between 1993 and 2000 (annual percentage change APC = -0.8%,  
27 95% confidence interval -2.6 to 1.0). It then increased between 2000 and 2004 (APC =  
28 7.8%, 95% CI 3.1 – 12.7) and then increased at a slower rate between 2004 and 2013 (APC =  
29 1.1%, 95% CI 0.4 – 1.8). The female to male ratio reduced over time from 2.74 in 1993 to  
30 1.93 in 2013. The median age of female and male patients with CTS increased from 49 and  
31 53 years respectively in 1993 to 54 and 59 years respectively in 2013 (see Supplementary  
32 Table 2). Supplementary Table 3 and supplementary Figures 1 and 2 further illustrate the  
33 crude prevalence of CTS over time by age and gender. The prevalence of CTS appears to  
34 increase with age in the male population, whereas the prevalence in women peaks in the 50  
35 – 59 age group, dips in the 60 – 69 years age group and then peaks once more in the 70+  
36 year age group.  
37  
38  
39  
40  
41  
42  
43  
44  
45  
46  
47  
48  
49  
50  
51  
52  
53  
54  
55  
56  
57  
58  
59  
60

Table 3 Crude prevalence of carpal tunnel syndrome (n/10,000 person years) per calendar year, as presented in UK primary care (CPRD)

| Year | Number of person years | Prevalent individuals | Total crude prevalence per 10,000 person years, (95% confidence interval) | Female prevalence per 10,000 person years, (95% confidence interval) | Male prevalence per 10,000 person years, (95% confidence interval) | Female: male |
|------|------------------------|-----------------------|---------------------------------------------------------------------------|----------------------------------------------------------------------|--------------------------------------------------------------------|--------------|
| 1993 | 1117443                | 2909                  | 26.03 (25.10 – 27.00)                                                     | 37.52 (35.96 – 39.13)                                                | 13.69 (12.72 – 14.71)                                              | 2.74         |
| 1994 | 1198256                | 3188                  | 26.61 (25.69 – 27.55)                                                     | 37.23 (35.73 – 38.79)                                                | 15.21 (14.23 – 16.25)                                              | 2.45         |
| 1995 | 1286800                | 3343                  | 25.98 (25.11 – 26.88)                                                     | 36.64 (35.20 – 38.12)                                                | 14.58 (13.65 – 15.56)                                              | 2.51         |
| 1996 | 1437567                | 3706                  | 25.78 (24.96 – 26.62)                                                     | 36.75 (35.38 – 38.16)                                                | 14.09 (13.23 – 15.00)                                              | 2.61         |
| 1997 | 1681756                | 4190                  | 24.91 (24.17 – 25.68)                                                     | 34.87 (33.64 – 36.14)                                                | 14.34 (13.53 – 15.18)                                              | 2.43         |
| 1998 | 1899393                | 4884                  | 25.71 (25.00 – 26.45)                                                     | 36.57 (35.38 – 37.79)                                                | 14.22 (13.46 – 15.01)                                              | 2.57         |
| 1999 | 2289158                | 5696                  | 24.88 (24.24 – 25.54)                                                     | 35.21 (34.14 – 36.30)                                                | 14.01 (13.32 – 14.72)                                              | 2.52         |
| 2000 | 2787457                | 6998                  | 25.11 (24.52 – 25.70)                                                     | 34.82 (33.86 – 35.81)                                                | 14.90 (14.26 – 15.57)                                              | 2.34         |
| 2001 | 3057458                | 8137                  | 26.61 (26.04 – 27.20)                                                     | 36.46 (35.52 – 37.42)                                                | 16.31 (15.67 – 16.98)                                              | 2.23         |
| 2002 | 3385511                | 9722                  | 28.72 (28.15 – 29.29)                                                     | 39.33 (38.40 – 40.28)                                                | 17.64 (17.00 – 18.29)                                              | 2.23         |
| 2003 | 3552908                | 11124                 | 31.31 (30.73 – 31.90)                                                     | 43.61 (42.66 – 44.59)                                                | 18.53 (17.90 – 19.18)                                              | 2.35         |
| 2004 | 3712172                | 12622                 | 34.00 (33.41 – 34.60)                                                     | 47.20 (46.23 – 48.19)                                                | 20.33 (19.68 – 20.99)                                              | 2.32         |
| 2005 | 3808183                | 12741                 | 33.46 (32.88 – 34.04)                                                     | 46.37 (45.42 – 47.34)                                                | 20.09 (19.45 – 20.74)                                              | 2.31         |
| 2006 | 3857487                | 12718                 | 32.97 (32.40 – 33.55)                                                     | 45.82 (44.88 – 46.78)                                                | 19.69 (19.07 – 20.33)                                              | 2.33         |
| 2007 | 3904068                | 13222                 | 33.87 (33.29 – 34.45)                                                     | 46.35 (45.41 – 47.31)                                                | 20.99 (20.35 – 21.65)                                              | 2.21         |
| 2008 | 3897624                | 14030                 | 36.00 (35.40 – 36.60)                                                     | 49.12 (48.15 – 50.11)                                                | 22.46 (21.79 – 23.14)                                              | 2.19         |
| 2009 | 3894989                | 14500                 | 37.23 (36.60 – 37.81)                                                     | 50.68 (49.69 – 51.68)                                                | 23.35 (22.68 – 24.05)                                              | 2.17         |
| 2010 | 3842773                | 14166                 | 36.86 (36.26 – 37.48)                                                     | 49.75 (48.76 – 50.75)                                                | 23.57 (22.88 – 24.27)                                              | 2.11         |
| 2011 | 3769676                | 13529                 | 35.89 (35.29 – 36.50)                                                     | 47.98 (47.00 – 48.97)                                                | 23.36 (22.67 – 24.07)                                              | 2.05         |
| 2012 | 3714877                | 13388                 | 36.04 (35.43 – 36.66)                                                     | 47.57 (46.59 – 48.56)                                                | 24.05 (23.35 – 24.78)                                              | 1.98         |
| 2013 | 3473094                | 12532                 | 36.08 (35.45 – 36.72)                                                     | 47.19 (46.18 – 48.21)                                                | 24.49 (23.75 – 25.25)                                              | 1.93         |

Table 4 Joinpoint analysis of crude prevalence

| Segment | Lower Endpoint | Upper Endpoint | Annual percentage change | Lower 95th confidence interval | Upper 95 <sup>th</sup> confidence interval | Test Statistic (t) | Prob >  t |
|---------|----------------|----------------|--------------------------|--------------------------------|--------------------------------------------|--------------------|-----------|
| 1       | 1993           | 2000           | -0.8                     | -2.6                           | 1.0                                        | -1.0               | 0.3       |
| 2       | 2000           | 2004           | 7.8 <sup>^</sup>         | 3.1                            | 12.7                                       | 3.7                | 0.0       |
| 3       | 2004           | 2013           | 1.1 <sup>^</sup>         | 0.4                            | 1.8                                        | 3.4                | 0.0       |

### Trends in incidence

Table 5 presents the annual incidence (crude estimates) for patients presenting in UK primary care with carpal tunnel syndrome between 1993 and 2013 and the demographics of the population. The denominator population for incidence, which is dependent on patients having 2 years up to standard data prior to the midpoint of the year in question, increased from 783,330 person years in 1993 to 3,015,670 person years in 2013. The crude incidence in 1993 was 20.22 per 10,000 person years (95% CI 19.24 - 21.24)), and for 2013, 27.68 per 10,000 person years (95% CI 27.09 – 28.28). As shown in Figure 2 and table 6, the results of the best fitting Joinpoint regression suggest the incidence increased between 1993 and 2000 (APC = 0.3, 95% CI -2.3 – 2.9). It then increased more quickly between 2000 and 2004 (APC = 6.9, 95% CI 0.5 – 13.7), before slowing between 2004 and 2013 (APC = 0.7, 95% CI -0.2 – 1.6). The female to male ratio reduced over time from 2.57 in 1993 to 1.88 in 2013. The median age of female and male patients were noted to increase from 50 and 51 years respectively in 1993 to 55 and 59 years respectively in 2013 (see Supplementary Table 4). Supplementary Table 5 and supplementary Figures 3 and 4 further illustrate the incidence of CTS over time by age and gender. As with prevalence, the incidence of CTS appears to increase with age in the male population, whereas the prevalence in women peaks in the 50 – 59 age group, dip in the 60 – 69 years age group and then peak once more in the 70+ year age group.



Table 5 Crude incidence of carpal tunnel syndrome (n/10,000 person years) per calendar year, as presented in UK primary care (CPRD)

| Year | Number of person years | Incident individuals | Total crude incidence per 10,000 person years, (95% confidence interval) | Female incidence per 10,000 person years, (95% confidence interval) | Male incidence per 10,000 person years, (95% confidence interval) | Female: male |
|------|------------------------|----------------------|--------------------------------------------------------------------------|---------------------------------------------------------------------|-------------------------------------------------------------------|--------------|
| 1993 | 783330                 | 1584                 | 20.22 (19.24 – 21.24)                                                    | 28.72 (27.09 – 30.42)                                               | 11.17 (10.14 – 12.29)                                             | 2.57         |
| 1994 | 868616                 | 1797                 | 20.69 (19.74 – 21.67)                                                    | 28.52 (26.97 – 30.13)                                               | 12.38 (11.34 – 13.69)                                             | 2.30         |
| 1995 | 1003593                | 1963                 | 19.56 (18.70 – 20.45)                                                    | 27.53 (26.12 – 29.00)                                               | 11.12 (10.20 – 12.10)                                             | 2.48         |
| 1996 | 1065068                | 2142                 | 20.11 (19.27 – 20.98)                                                    | 28.39 (27.00 – 29.84)                                               | 11.37 (10.47 – 12.33)                                             | 2.50         |
| 1997 | 1150299                | 2306                 | 20.05 (19.24 – 20.88)                                                    | 28.39 (27.05 – 29.79)                                               | 11.25 (10.39 – 12.16)                                             | 2.52         |
| 1998 | 1300074                | 2696                 | 20.74 (19.95 – 21.52)                                                    | 29.65 (28.57 – 31.22)                                               | 11.37 (10.56 – 12.23)                                             | 2.61         |
| 1999 | 1497673                | 3030                 | 20.23 (19.52 – 20.10)                                                    | 28.53 (27.35 – 29.75)                                               | 11.54 (10.77 – 12.34)                                             | 2.47         |
| 2000 | 1682027                | 3462                 | 20.58 (19.90 – 21.28)                                                    | 28.66 (27.54 – 29.81)                                               | 12.15 (11.41 – 12.93)                                             | 2.36         |
| 2001 | 2019596                | 4391                 | 21.74 (21.10 – 22.40)                                                    | 29.72 (28.68 – 30.79)                                               | 13.46 (12.74 – 14.20)                                             | 2.21         |
| 2002 | 2456761                | 5718                 | 23.27 (22.68 – 31.78)                                                    | 31.78 (30.78 – 32.79)                                               | 14.47 (13.80 – 15.17)                                             | 2.20         |
| 2003 | 2669111                | 6772                 | 25.37 (24.77 – 25.98)                                                    | 35.13 (34.14 – 36.14)                                               | 15.33 (14.67 – 16.02)                                             | 2.29         |
| 2004 | 2779821                | 7868                 | 28.30 (27.68 – 28.94)                                                    | 39.22 (38.19 – 40.27)                                               | 17.10 (16.42 – 17.81)                                             | 2.29         |
| 2005 | 3164506                | 8113                 | 25.64 (25.08 – 26.20)                                                    | 35.55 (34.63 – 36.48)                                               | 15.49 (14.88 – 16.12)                                             | 2.30         |
| 2006 | 3307051                | 8337                 | 25.21 (24.67 – 25.76)                                                    | 34.91 (34.02 – 35.82)                                               | 15.27 (14.68 – 15.89)                                             | 2.29         |
| 2007 | 3343009                | 8865                 | 26.52 (25.97 – 27.08)                                                    | 35.76 (34.86 – 36.67)                                               | 17.07 (16.45 – 17.71)                                             | 2.09         |
| 2008 | 3341299                | 9437                 | 28.24 (27.68 – 28.82)                                                    | 38.23 (37.30 – 39.17)                                               | 18.06 (17.42 – 18.72)                                             | 2.12         |
| 2009 | 3383196                | 9918                 | 29.32 (28.74 – 29.90)                                                    | 39.73 (38.79 – 50.68)                                               | 18.69 (18.04 – 19.36)                                             | 2.13         |
| 2010 | 3357338                | 9634                 | 28.70 (28.13 – 29.27)                                                    | 38.70 (37.77 – 39.64)                                               | 18.46 (17.82 – 19.13)                                             | 2.10         |
| 2011 | 3269296                | 9083                 | 27.78 (27.21 – 28.36)                                                    | 37.11 (36.19 – 38.05)                                               | 18.20 (17.54 – 18.87)                                             | 2.04         |
| 2012 | 3222880                | 9011                 | 27.96 (27.39 – 28.54)                                                    | 36.44 (35.52 – 37.88)                                               | 19.23 (18.56 – 19.93)                                             | 1.89         |
| 2013 | 3015670                | 8346                 | 27.68 (27.09 – 28.28)                                                    | 35.95 (35.01 – 36.92)                                               | 19.12 (18.43 – 19.84)                                             | 1.88         |

Table 6 Joinpoint analysis of crude incidence

| Segment | Lower Endpoint | Upper Endpoint | Annual percentage change | Lower 95th confidence interval | Upper 95 <sup>th</sup> confidence interval | Test Statistic (t) | Prob >  t |
|---------|----------------|----------------|--------------------------|--------------------------------|--------------------------------------------|--------------------|-----------|
| 1       | 1993           | 2000           | 0.3                      | -2.3                           | 2.9                                        | 0.2                | 0.8       |
| 2       | 2000           | 2004           | 6.9 <sup>^</sup>         | 0.5                            | 13.7                                       | 2.3                | 0.0       |
| 3       | 2004           | 2013           | 0.7                      | -0.2                           | 1.6                                        | 1.7                | 0.1       |

### Trends in the percentage of patients with carpal tunnel syndrome referred and receiving surgical management

Table 7 presents the percentage of prevalent patients with a recorded episode of CTR in each calendar year between 1993 and 2013 and the demographics of this sample. The percentage of all patients with a recorded episode of CTR in 1993 was 19.35%, and for 2013, 27.41%. As shown in Figure 3 and corresponding Table 8 the percentage of patients with a coded episode of CTR increased between 1993 - 2007 (annual percentage change APC = 2.6, 95% CI 1.9 – 3.2). It then appeared to decrease between 2007 and 2013 (APC = -1.7, 95% CI -3.3 - -0.3). The median age of females and males receiving CTR were noted to increase from 53 and 55 years respectively in 1993 to 57 and 62 years respectively in 2013.

Table 7 Percentage of patients with carpal tunnel syndrome with a recorded episode of carpal tunnel release surgery per calendar year, as presented in UK primary care (CPRD)

| Year | Episodes per 10,000 person years | % prevalent individuals having surgery | % prevalent females having surgery | % prevalent males having surgery | Female median age (25% - 75% Interquartile range) | Male median age (25% - 75% Interquartile range) |
|------|----------------------------------|----------------------------------------|------------------------------------|----------------------------------|---------------------------------------------------|-------------------------------------------------|
| 1993 | 5.04                             | 19.35                                  | 18.78                              | 21.03                            | 53 (43 – 64)                                      | 55 (44 – 69)                                    |
| 1994 | 5.70                             | 21.42                                  | 20.62                              | 23.52                            | 53 (43 – 68)                                      | 58 (45 – 70)                                    |
| 1995 | 6.19                             | 23.81                                  | 23.40                              | 24.92                            | 53 (42 – 67)                                      | 55 (44 – 70)                                    |
| 1996 | 5.41                             | 20.99                                  | 20.48                              | 22.43                            | 53 (44 – 65)                                      | 52 (40 – 65)                                    |
| 1997 | 5.70                             | 22.89                                  | 22.14                              | 24.81                            | 53 (45 – 67)                                      | 56 (42 – 69)                                    |
| 1998 | 5.73                             | 22.28                                  | 21.28                              | 25.00                            | 53 (44 – 65)                                      | 53 (44 – 65)                                    |
| 1999 | 6.24                             | 25.09                                  | 24.60                              | 26.38                            | 54 (44 – 67)                                      | 56 (46 – 70)                                    |
| 2000 | 6.41                             | 25.54                                  | 24.84                              | 27.23                            | 54 (44 – 68)                                      | 56 (45 – 69)                                    |
| 2001 | 6.88                             | 25.87                                  | 25.95                              | 25.68                            | 55 (45 – 68)                                      | 58 (46 – 71)                                    |
| 2002 | 7.02                             | 24.46                                  | 24.19                              | 25.09                            | 57 (46 – 71)                                      | 55 (45 – 68)                                    |
| 2003 | 8.26                             | 26.39                                  | 25.88                              | 27.66                            | 56 (45 – 67)                                      | 57 (46 – 71)                                    |
| 2004 | 9.34                             | 27.48                                  | 27.38                              | 27.74                            | 56 (46 – 67)                                      | 57 (47 – 68)                                    |
| 2005 | 9.70                             | 29.00                                  | 28.31                              | 30.65                            | 57 (47 – 68)                                      | 58 (46 – 71)                                    |
| 2006 | 9.36                             | 28.40                                  | 28.31                              | 28.61                            | 57 (47 – 68)                                      | 60 (48 – 72)                                    |
| 2007 | 9.71                             | 28.66                                  | 28.26                              | 29.59                            | 56 (46 – 69)                                      | 59 (48 – 71)                                    |
| 2008 | 10.53                            | 29.25                                  | 29.00                              | 29.82                            | 56 (46 – 68)                                      | 60 (49 – 72)                                    |
| 2009 | 10.92                            | 29.32                                  | 28.73                              | 30.66                            | 56 (46 – 70)                                      | 61 (49 – 72)                                    |
| 2010 | 10.40                            | 28.22                                  | 27.57                              | 29.62                            | 57 (47 – 71)                                      | 61 (48 – 73)                                    |
| 2011 | 9.47                             | 26.37                                  | 26.11                              | 26.93                            | 57 (47 – 70)                                      | 61 (49 – 73)                                    |
| 2012 | 9.48                             | 26.31                                  | 25.89                              | 27.19                            | 57 (47 – 71)                                      | 60 (49 – 73)                                    |
| 2013 | 9.89                             | 27.41                                  | 26.47                              | 29.30                            | 57 (48 – 70)                                      | 62 (51 – 74)                                    |

Table 8 Joinpoint

| Segment | Lower Endpoint | Upper Endpoint | Annual percentage change | Lower 95th confidence interval | Upper 95 <sup>th</sup> confidence interval | Test Statistic (t) | Prob >  t |
|---------|----------------|----------------|--------------------------|--------------------------------|--------------------------------------------|--------------------|-----------|
| 1       | 1993           | 2007           | 2.6 <sup>^</sup>         | 1.9                            | 3.2                                        | 8.2                | 0.0       |
| 2       | 2007           | 2013           | -1.7 <sup>^</sup>        | -3.1                           | -0.3                                       | -2.6               | 0.0       |

## DISCUSSION

Whilst the prevalence and incidence of CTS have increased over the study period 1993-2013, results show that episodes of surgery, increased until 2007 and declined thereafter.

Supplementary Tables 6 and 7 summarise estimates of the prevalence, incidence and sex ratios of CTS from a previous scoping review of literature pertaining to the general population, demonstrating the substantial variation in results between studies, which may partly be the results of differences in definition of CTS applied and population observed. Studies which also utilised primary care data showed a similar estimate of the incidence of CTS in a UK primary care population [18] and similarly reported an increase in incidence over time, albeit in a Dutch primary care population.[21] As described in previous studies, CTS shows a peak in prevalence and incidence in women of middle age (50-59 group, likely due to hormonal changes around the time of the menopause)[18], whilst in the male population, the prevalence and incidence of CTS increased with age. Gelfman et al also commented that an increasing number of older people presenting with CTS had been noted over the course of their study.[20] The increase in the prevalence and incidence of CTS in the older aged male groups, may partially account for the observed decrease in the female to male ratio, over time.

The variability in the case definition of carpal tunnel syndrome was highlighted by Descatha et al 2011 who identified seven case definitions of CTS proposed for use in population based studies. Definitions included variations of: symptoms only; symptoms and examination findings; symptoms and either physical examination or electrodiagnostic results and symptoms and electrodiagnostic results. This study showed a range in the population prevalence of CTS from 2.5% to 11%, with studies using less specific case definitions yielding higher prevalence rates.[33] Misclassification ranged between 1 and 10%. The prevalence of CTS in any given population is likely therefore to depend on the definition of CTS applied. The case definition in our study is derived from GP recorded diagnosis and treatment codes, which may have been based on clinical findings alone; those who have had further investigations and those who have received definitive condition specific treatment. Hence it utilises a pragmatic approach, across a large population that will include all patients presenting to their GP with symptoms. Our study methods do however assume that patients with symptoms will be presenting in primary care or be receiving definitive coded treatment. The study will not capture patients with chronic symptoms who are not presenting in primary care or who had a coded episode of surgery or injection.

Although Joinpoint analysis does not provide evidence for the cause of a change in observed outcomes, it highlights when a significant change in trend has taken place. Our results suggest that the annual percentage change in prevalence and incidence was highest between 2000 and 2004. A possible reason for this may be the publication of the UK Government's information technology strategy for the NHS in 1998,[34] which proposed that by 2005, the person-based electronic health record (HER), would have been fully implemented.[35] Although no direct evidence for this was found, it may be possible that with the increasing use of IT systems in primary care and attention to providing Read codes for

1  
2  
3 each consultation, episodes of CTS were more frequently and accurately recorded. This  
4 would not however explain the continuing increase of the incidence in CTS post 2005.

5  
6 Between 2000 and 2004, the Government implemented the second phase of its 'War on  
7 Waiting,' i.e. the reduction of waiting times. For example, the maximum wait for a day-case  
8 procedure (e.g. a CTR) was reduced from 18 months to 6 months. [36] The peak in  
9 prevalence of CTS (with our definition partly based also on treatment codes, which in 2013  
10 constituted 29.36% of prevalent patients) observed in 2004 may therefore be partly  
11 explained by the fact that patients requiring surgery were 'accumulating' between 2000 and  
12 2004 and subsequently received definitive treatment. This effect would however not be  
13 expected to impact so heavily upon the incidence, which disregards repeat patient  
14 presentations in subsequent annual periods, unless patients with a less specific code  
15 received treatment and appeared as an incident case. The introduction of the 18 week target  
16 of time from referral to treatment in 2008 did not seem to have a similar impact on estimates  
17 of prevalence or incidence of CTS, which makes it less certain to what extent these policy  
18 changes may have influenced our results. There are likely to be further reasons behind the  
19 observed changes.  
20

21 The change in trends of 2004 may also represent a change in service. The introduction of  
22 the Quality and Outcome Framework (QOF) occurred with the advent of the General Medical  
23 Services (GMS) contract in 2004. Although there has never been a musculoskeletal health  
24 domain, the importance of coding to maintain registers and evidence of outcomes in line with  
25 QOF may have influenced coding behaviour.  
26

27 At the same time as QOF, Primary Care Trusts (PCT's) were given a role in commissioning  
28 services. The ability of PCT's to commission new services heralded the development of the  
29 Musculoskeletal Interface Clinics (MIC), which act as a 'one stop shop' for patients with  
30 musculoskeletal problems. A referral to this clinic from primary care may also be a reason  
31 prevalent patients with persisting symptoms stopped presenting in primary care.  
32

33 These three factors (improved coding, service redevelopment and a reduction in waiting  
34 times) may all partly explain the change in incidence and prevalence of CTS between 2000  
35 and 2004 but are unlikely to fully explain the observed trends. Further factors of potential  
36 influence may include the increasing rates of risk factors of CTS such as diabetes and  
37 obesity.[37, 38] Whilst standardising the prevalence and incidence by age and gender did  
38 not change the overall picture of the changing trends, supplementary Figure 1 suggests that  
39 the prevalence of CTS increased most obviously in the male and female over 70 year  
40 groups.  
41

42 The Joinpoint analysis suggested an increase in surgical management of CTS between  
43 1993 and 2007 (APC = 2.55), followed by a reducing trend between 2007 (95% CI 2004-  
44 2009) and the end of the study in 2013 (APC = -1.72).  
45

46 Previous studies have described the epidemiology and the rates of CTR in the UK. This  
47 study provides updated data observing the presenting primary care population. Using data  
48 from the General Practice Research Database (GPRD) (forerunner to CPRD) Latinovic et al  
49 reported that 31% of patients with CTS had surgery in 2000 [18], which is similar to the  
50 25.5% found in our study at the same time point. The small difference between the estimates  
51 may be the result of a difference in the calculation used to derive the denominator  
52 population. Audit data from one tertiary hand centre, Wild et al also showed that the rate of  
53 referrals for CTR surgery had increased over the 10 years between 1989-9 and 2000-1.[25]  
54 Furthermore, Bebbington and Furniss observed demographic population shifts in hand  
55 conditions including CTS within Hospital Episode Statistics, which record diagnoses and  
56  
57

1  
2  
3 procedures performed within NHS Hospitals in England. They used linear regression to  
4 predict future trends in hand surgery, showing that whilst absolute numbers of CTS  
5 diagnoses and CTR procedures increased between 1998 and 2011, the pre-2008 increase  
6 in CTR was significantly steeper than the post-2008 slope ( $p < 0.001$ ).[26] This is suggestive  
7 of a decrease in the surgical management of CTS in terms of the proportion of patients with  
8 CTS having an operation, but not necessarily in the numbers of surgical episodes in  
9 absolute terms, which Bebbington and Furniss predict will have increased by 99% (95% CI  
10 65 – 132) in 2030 compared to 2011.[26] The data from CPRD however, suggested a  
11 reduction in both real term episodes of CTR as well as the proportion of the (increasing)  
12 prevalent population receiving surgical treatment.  
13

14 We may speculate regarding potential reasons for the initial increase in surgical  
15 management of CTS, for example, increased access to specialist services (e.g. community  
16 based Musculoskeletal Interface Clinics); increased litigation leading to more definitive  
17 treatments being sought, and increased patient expectations and demand, but we have no  
18 evidence for such explanations.  
19

20 The decreasing trend in the use of the use of CTR post 2007 is likely to be multifactorial,  
21 however the changing structure of the NHS and its funding streams may have influenced the  
22 observed trend. Around 2007 – 2008, practice-based commissioning (PBC) was being  
23 introduced. This gave primary care notional budgets with which to purchase care for their  
24 patients with the aim of aligning clinical and financial responsibility. Restricting access to  
25 certain procedures including CTR, by implementing pre-specified criteria, was one way to  
26 help achieve this, which may have resulted in a reduction in the use of CTR.  
27

28 There are a number of limitations associated with the data in this study. The accuracy of  
29 consultation data is dependent on the validity of the computerised information it uses. In a  
30 review of 212 publications which aimed to validate diagnoses recorded in GPRD data,  
31 Herrett et reported that the median proportion of cases with a confirmed diagnosis was 89%  
32 (range 24 – 100%), but the majority of publications did not present the sensitivity of a coded  
33 diagnosis, which means that information regarding the proportion of missed cases is lacking.  
34 Potential misclassification; non-attendance in primary care; variation in between GP coding  
35 and a lack of coding may all lead to an unmeasured shortfall in observed cases.[27, 39]. This  
36 study relies on the diagnosis of CTS to be correct and the subsequent coding to be precise.  
37 Whilst CTS diagnoses have not been validated, in a study comparing musculoskeletal  
38 diagnoses in four different databases, Jordan et al suggested that musculoskeletal coding in  
39 GPRD was less reliable than in its other healthcare datasets including CiPCA.[40] We took  
40 measures to reduce the effect of miscoding (e.g. including surgery and injection codes in  
41 prevalence measures, if diagnostic codes had not been used), but it is possible that results  
42 will not be entirely representative of the true prevalence and incidence of CTS.  
43  
44

45 Given the lack of clarity in the accuracy of coding and the likelihood that associated clinical  
46 encounters following a CTR were coded using a surgical code, only the first surgical code  
47 could reliably be used to indicate an episode of surgery. This is likely to have led to an  
48 underestimation of surgical episodes being identified as episodes on the contralateral hand  
49 will have been automatically discounted as they were undistinguishable. Furthermore,  
50 prevalence and incidence were similarly likely to have been underestimated as repeat  
51 presentations for the ipsilateral hand are indistinguishable from presentations in the  
52 contralateral hand.  
53

54 Whilst CPRD provides a large generalizable sample, which has substantial benefits when  
55 estimating epidemiological trends, it cannot directly measure patient reported outcomes.  
56 Furthermore, surgery can be seen as a 'gold standard' treatment, but it does not necessarily  
57

1  
2  
3 signify cure. A review of the surgical treatment of CTS reported that 70% - 90% of patients  
4 undergoing a CTR have a good outcome (definitions varied).[41] In a retrospective cohort  
5 study over a mean follow up of 13 years post-surgery, 88% of patients were either  
6 completely satisfied or very satisfied with surgery. 74% reported their symptoms had  
7 completely resolved. 1.8% (113 patients) had undergone repeat surgery. [42] There is little  
8 evidence however that CTR is an appropriate initial management option for patients  
9 presenting to primary care with mild to moderate symptoms, especially in the absence of  
10 high quality trial evidence that conservative management is ineffective.[43, 44]  
11

12 Future research in this field could describe the characteristics of patients presenting with  
13 CTS in greater detail, and observe course and prognosis of CTS in primary care. It may then  
14 be possible to identify predictors of the outcome of primary care management, and  
15 potentially identify patients requiring surgery.  
16

## 17 **CONCLUSION**

18 An increase in the incidence and prevalence of CTS is likely to lead to an increased demand  
19 on services and cost to the healthcare economy.[26] This study has demonstrated an  
20 increase in the prevalence and incidence of physician diagnosed carpal tunnel syndrome  
21 over the study period between 1993 and 2013. Rates of referral for CTS and surgical  
22 intervention have also increased over the study period, however in the later years of the  
23 study, the percent of patients receiving surgery has begun to decline.  
24

## 25 **Figures**

26  
27 Figure 1 Joinpoint analysis of the crude prevalence of carpal tunnel syndrome between 1993  
28 and 2013  
29

30 Figure 2 Joinpoint analysis of the crude incidence of carpal tunnel syndrome between 1993  
31 and 2013  
32

33 Figure 3 Joinpoint analysis of percentage of prevalent patients having carpal tunnel surgery  
34

## 35 **Acknowledgments**

36 The authors wish to thank Dr Dahai Yu for his assistance with the CPRD data download.  
37

## 38 **Declaration of competing interests**

39 "All authors have completed the ICMJE uniform disclosure form  
40 at [www.icmje.org/coi\\_disclosure.pdf](http://www.icmje.org/coi_disclosure.pdf) and declare: no support from any organisation for the  
41 submitted work  
42

## 43 **Funding statement**

44 CB is funded by the National Institute of Health Research School for Primary Care (NIHR  
45 SPQR). The views expressed are those of the authors and not necessarily those of the  
46 NIHR, the NHS or the Department of health; DvdW is a member of PROGRESS Medical  
47 Research Council Prognosis Research Strategy (PROGRESS) Partnership  
48 (G0902393/99558); no other relationships or activities that could appear to have influenced  
49 the submitted work."  
50

## 51 **Details of contributors**

52 CB, LC, YC and DvdW all contributed to the initial draft and subsequent revisions. CB is the  
53 guarantor of the paper. All authors had full access to all of the data and can take  
54 responsibility for the integrity of the data and the accuracy of the data analysis. CB affirms  
55  
56  
57

1  
2  
3 that the manuscript is an honest, accurate, and transparent account of the study being  
4 reported; that no important aspects of the study have been omitted and that any  
5 discrepancies from the study as planned have been explained.

#### 6 7 **Data sharing**

8 To ensure patient privacy and confidentiality, data from the CPRD cannot be shared.  
9 Therefore, no additional data are available.

#### 10 11 **Copyright, open access and permission to reuse**

12 The Corresponding Author has the right to grant on behalf of all authors and does grant on  
13 behalf of all authors, [a worldwide licence](#) to the Publishers and its licensees in perpetuity, in  
14 all forms, formats and media (whether known now or created in the future), to i) publish,  
15 reproduce, distribute, display and store the Contribution, ii) translate the Contribution into  
16 other languages, create adaptations, reprints, include within collections and create  
17 summaries, extracts and/or, abstracts of the Contribution, iii) create any other derivative  
18 work(s) based on the Contribution, iv) to exploit all subsidiary rights in the Contribution, v)  
19 the inclusion of electronic links from the Contribution to third party material where-ever it may  
20 be located; and, vi) licence any third party to do any or all of the above.

#### 21 22 **References**

23  
24  
25 1 Alfonso C, Jann S, Massa R, et al. Diagnosis, treatment and follow-up of the carpal tunnel  
26 syndrome: A review. *Neurological Sciences* 2010;31:243-52.

27  
28 2 Aroori S, Spence RA. Carpal tunnel syndrome. *Ulster Med J* 2008;77:6-17.

29  
30 3 Padua L, Padua R, Lo Monaco M, et al. Multiperspective assessment of carpal tunnel  
31 syndrome: A multicenter study. *Neurology* 1999;53:1654-9.

32  
33 4 Foley M, Silverstein B, Polissar N. The economic burden of carpal tunnel syndrome: long-  
34 term earnings of CTS claimants in Washington State. *Am J Ind Med* 2007;50:155-72.

35  
36 5 Atroshi I, Gummesson C, Johnsson R, et al. Symptoms, disability, and quality of life in  
37 patients with carpal tunnel syndrome. *Journal of Hand Surgery - American Volume*  
38 1999;24:398-404.

39  
40 6 Jenkins PJ, Srikantharajah D, Duckworth AD, et al. Carpal tunnel syndrome: the  
41 association with occupation at a population level. *Journal of Hand Surgery-European*  
42 *Volume* 2013;38E:67-72 doi:10.1177/1753193412455790.

43  
44 7 Middleton SD, Anakwe RE. Carpal tunnel syndrome. *BMJ* 2014;349  
45 doi:10.1136/bmj.g6437.

46  
47 8 Padua L, Coraci D, Erra C, et al. Carpal tunnel syndrome: clinical features, diagnosis, and  
48 management. *Lancet Neurol* 2016;15:1273-84 doi:S1474-4422(16)30231-9 [pii].

49  
50 9 American Academy of Orthopaedic Surgeons. Clinical practice guideline on the diagnosis  
51 of carpal tunnel syndrome 2007.

52  
53 10 Carpal Tunnel Syndrome. Available at: [http://cks.nice.org.uk/carpal-tunnel-](http://cks.nice.org.uk/carpal-tunnel-syndrome#!scenariorecommendation:1)  
54 [syndrome#!scenariorecommendation:1](http://cks.nice.org.uk/carpal-tunnel-syndrome#!scenariorecommendation:1). Accessed 05/14, 2013.

- 1  
2  
3 11 Carpal Tunnel Syndrome (CTS) - The Map of Medicine. Available at:  
4 [http://app.mapofmedicine.com/mom/127/page.html?department-id=8&specialty-](http://app.mapofmedicine.com/mom/127/page.html?department-id=8&specialty-id=1037&pathway-id=3411&page-id=8741&history=clear)  
5 [id=1037&pathway-id=3411&page-id=8741&history=clear](http://app.mapofmedicine.com/mom/127/page.html?department-id=8&specialty-id=1037&pathway-id=3411&page-id=8741&history=clear). Accessed 25/10/2012, 2012.  
6  
7 12 Royal College of Surgeons. Commissioning Guide: Treatment of Carpal Tunnel  
8 Syndrome 2016.  
9  
10 13 Middleton SD, Anakwe RE. *BMJ* 2014;349 doi:10.1136/bmj.g6437.  
11  
12 14 Ferry S, Pritchard T, Keenan J, et al. Estimating the prevalence of delayed median nerve  
13 conduction in the general population. *Br J Rheumatol* 1998;37:630-5.  
14  
15 15 de Krom MC, Knipschild PG, Kester AD, et al. Carpal tunnel syndrome: prevalence in the  
16 general population. *J Clin Epidemiol* 1992;45:373-6.  
17  
18 16 Atroshi I. Carpal tunnel syndrome--prevalence, electrodiagnosis and outcome  
19 instruments. *Acta Orthop Scand* 1999;70:70-1.  
20  
21 17 Papanicolaou GD, McCabe SJ, Firrell J. The prevalence and characteristics of nerve  
22 compression symptoms in the general population. *Journal of Hand Surgery - American*  
23 *Volume* 2001;26:460-6.  
24  
25 18 Latinovic R, Gulliford MC, Hughes RA. Incidence of common compressive neuropathies  
26 in primary care. *J Neurol Neurosurg Psychiatry* 2006;77:263-5  
27 doi:10.1136/jnnp.2005.066696.  
28  
29 19 Bland JDP, Rudolfer SM. Clinical surveillance of carpal tunnel syndrome in two areas of  
30 the United Kingdom, 1991–2001. *Journal of Neurology, Neurosurgery & Psychiatry*  
31 2003;74:1674-9 doi:10.1136/jnnp.74.12.1674.  
32  
33 20 Gelfman R, Melton LJ, 3rd, Yawn BP, et al. Long-term trends in carpal tunnel syndrome.  
34 *Neurology* 2009;72:33-41 doi:10.1212/01.wnl.0000338533.88960.b9;  
35 10.1212/01.wnl.0000338533.88960.b9.  
36  
37 21 Bongers FJ, Schellevis FG, van den Bosch WJ, et al. Carpal tunnel syndrome in general  
38 practice (1987 and 2001): incidence and the role of occupational and non-occupational  
39 factors. *Br J Gen Pract* 2007;57:36-9.  
40  
41 22 Atroshi I, Englund M, Turkiewicz A, et al. Incidence of physician-diagnosed carpal tunnel  
42 syndrome in the general population. *Arch Intern Med* 2011;171:943-5.  
43  
44 23 Jenkins PJ, Watts AC, Duckworth AD, et al. Socioeconomic deprivation and the  
45 epidemiology of carpal tunnel syndrome. *Journal of Hand Surgery-European Volume*  
46 2012;37E:123-9 doi:10.1177/1753193411419952.  
47  
48 24 Nordstrom DL, DeStefano F, Vierkant RA, et al. Incidence of diagnosed carpal tunnel  
49 syndrome in a general population. *Epidemiology* 1998;9:342-5.  
50  
51 25 Wildin C, Dias JJ, Heras-Palou C, et al. Trends in elective hand surgery referrals from  
52 primary care. *Ann R Coll Surg Engl* 2006;88:543-6 doi:10.1308/003588406X117070.  
53  
54  
55  
56  
57  
58  
59  
60



1  
2  
3 26 Bebbington E, Furniss D. Linear regression analysis of Hospital Episode Statistics  
4 predicts a large increase in demand for elective hand surgery in England. *J Plast Reconstr*  
5 *Aesthet Surg* 2015;68:243-51 doi:10.1016/j.bjps.2014.10.011 [doi].

6  
7 27 Herrett E, Gallagher AM, Bhaskaran K, et al. Data Resource Profile: Clinical Practice  
8 Research Datalink (CPRD). *Int J Epidemiol* 2015;44:827-36 doi:10.1093/ije/dyv098 [doi].

9  
10 28 Chisholm J. The Read clinical classification. *BMJ* 1990;300:1092.

11  
12 29 Jordan K, Porcheret M, Croft P. Quality of morbidity coding in general practice  
13 computerized medical records: a systematic review. *Fam Pract* 2004;21:396-412  
14 doi:10.1093/fampra/cmh409 [doi].

15  
16 30 Population Estimates. Available at:  
17 <https://www.ons.gov.uk/peoplepopulationandcommunity/populationandmigration/populationestimates>.  
18 Accessed 02/16, 2017.

19  
20 31 National Cancer Institute. Joinpoint Regression Program - Surveillance Research  
21 Program 2017.

22  
23 32 Bedson J, Chen Y, Hayward RA, et al. Trends in long-term opioid prescribing in primary  
24 care patients with musculoskeletal conditions: an observational database study. *Pain*  
25 2016;157:1525-31 doi:10.1097/j.pain.0000000000000557.

26  
27 33 Descatha A, Dale AM, Franzblau A, et al. Comparison of research case definitions for  
28 carpal tunnel syndrome. *Scand J Work Environ Health* 2011;37:298-306  
29 doi:10.5271/sjweh.3148.

30  
31 34 NHS Executive. *Information for Health: An Information Strategy for the Modern NHS*  
32 *1998–2005. A National Strategy for Local Implementation* 1998.

33  
34 35 Porcheret M, Hughes R, Evans D, et al. Data quality of general practice electronic health  
35 records: the impact of a program of assessments, feedback, and training. *Journal of the*  
36 *American Medical Informatics Association* 2004;11:78-86  
37 doi:<http://dx.doi.org/10.1197/jamia.M1362>.

38  
39 36 Lewis R, Appleby J. Can the English NHS meet the 18-week waiting list target?. *J R Soc*  
40 *Med* 2006;99:10-3.

41  
42 37 Pourmemari MH, Shiri R. Diabetes as a risk factor for carpal tunnel syndrome: a  
43 systematic review and meta-analysis. *Diabetic Med* 2016;33:10-6 doi:10.1111/dme.12855.

44  
45 38 Shiri R, Pourmemari MH, Falah-Hassani K, et al. The effect of excess body mass on the  
46 risk of carpal tunnel syndrome: a meta-analysis of 58 studies. *Obesity Reviews*  
47 2015;16:1094-104 doi:10.1111/obr.12324.

48  
49 39 Herrett E, Thomas SL, Schoonen WM, et al. Validation and validity of diagnoses in the  
50 General Practice Research Database: a systematic review. *Br J Clin Pharmacol* 2009;69:4-  
51 14 doi:10.1111/j.1365-2125.2009.03537.x.

52  
53 40 Jordan K, Clarke AM, Symmons DP, et al. Measuring disease prevalence: a comparison  
54 of musculoskeletal disease using four general practice consultation databases. *Br J Gen*  
55 *Pract* 2007;57:7-14.

1  
2  
3 41 Turner A, Kimble F, Gulyás K, et al. Can the outcome of open carpal tunnel release be  
4 predicted?: a review of the literature. *ANZ J Surg* 2010;80:50-4 doi:10.1111/j.1445-  
5 2197.2009.05175.x.

6  
7 42 Louie DL, Earp BE, Collins JE, et al. *The Journal of Bone & Joint Surgery* 2013;95:1067-  
8 73 doi:10.2106/JBJS.L.00903.

9  
10 43 Marshall S, Tardif G, Ashworth N. Local corticosteroid injection for carpal tunnel  
11 syndrome. *Cochrane database of systematic reviews (Online)* 2007:001554.

12  
13 44 Page MJ, Massy-Westropp N, O'Connor D, et al. Splinting for carpal tunnel syndrome.  
14 *Cochrane Database Syst Rev* 2012;7:CD010003 doi:10.1002/14651858.CD010003.

15  
16  
17  
18  
19  
20  
21  
22  
23  
24  
25  
26  
27  
28  
29  
30  
31  
32  
33  
34  
35  
36  
37  
38  
39  
40  
41  
42  
43  
44  
45  
46  
47  
48  
49  
50  
51  
52  
53  
54  
55  
56  
57  
58  
59  
60

For peer review only

Joinpoint analysis of the crude prevalence of carpal tunnel syndrome between 1993 and 2013



Figure 1 Joinpoint analysis of the crude prevalence of carpal tunnel syndrome between 1993 and 2013

^APC = annual percentage change, which is significantly different from zero, significance level  $p < 0.05$

Figure 1 Joinpoint analysis of the crude prevalence of carpal tunnel syndrome between 1993 and 2013

73x50mm (300 x 300 DPI)

Joinpoint analysis of the crude incidence of carpal tunnel syndrome between 1993 and 2013



Figure 2 Joinpoint analysis of the crude incidence of carpal tunnel syndrome between 1993 and 2013

^APC = annual percentage change, which is significantly different from zero, significance level  $p < 0.05$

Figure 2 Joinpoint analysis of the crude incidence of carpal tunnel syndrome between 1993 and 2013

71x52mm (300 x 300 DPI)

Joinpoint analysis of the percentage of prevalent patients with a recorded episode of carpal tunnel release, in each calendar year syndrome, between 1993 and 2013



Figure 3 Joinpoint analysis of percentage of prevalent patients having carpal tunnel surgery

^APC = annual percentage change, which is significantly different from zero, significance level  $p < 0.05$

Figure 3 Joinpoint analysis of the percentage of prevalent patients having carpal tunnel surgery

72x53mm (300 x 300 DPI)

1  
2  
3  
4  
5  
6  
7  
8  
9  
10  
11  
12  
13  
14  
15  
16  
17  
18  
19  
20  
21  
22  
23  
24  
25  
26  
27  
28  
29  
30  
31  
32  
33  
34  
35  
36  
37  
38  
39  
40  
41  
42  
43  
44  
45  
46  
47

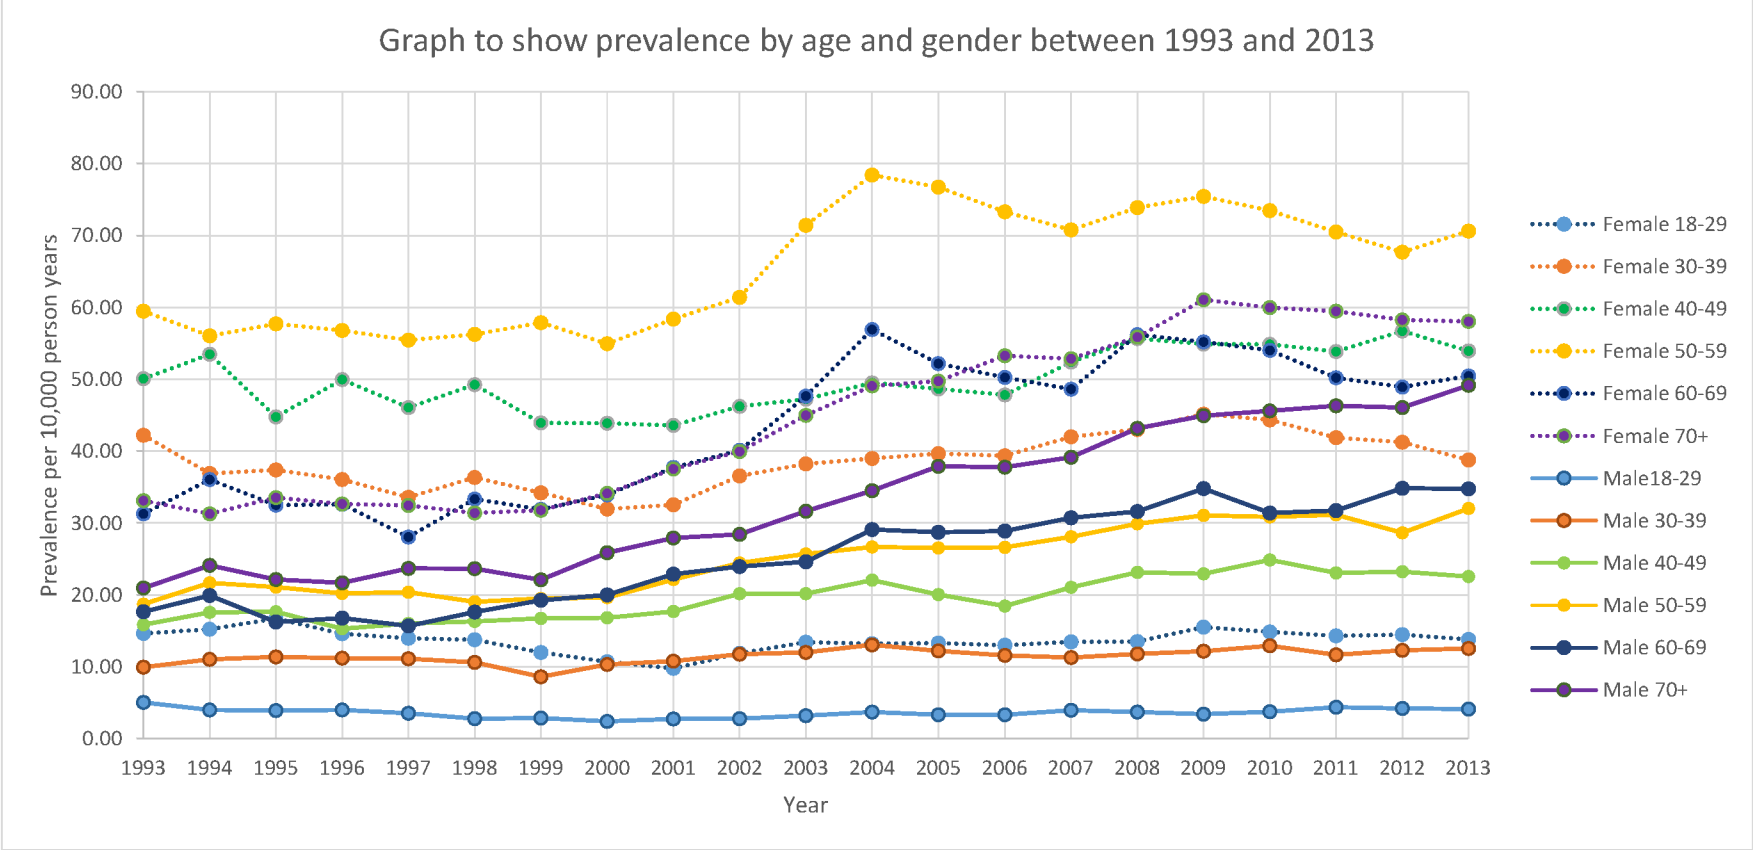



31  
32  
33  
34  
35  
36  
37  
38  
39  
40  
41  
42  
43  
44  
45  
46

Suppl. Fig 2 Crude prevalence of carpal tunnel syndrome in 2013 by age and gender



Suppl. Fig 3 Graph to show incidence by age and gender between 1993 and 2013





32  
33  
34  
35  
36  
37  
38  
39  
40  
41  
42  
43  
44  
45  
46

Suppl. Fig 4 Crude incidence of carpal tunnel syndrome in 2013 by age and gender

Suppl. Table 1 The age and sex standardised estimates of the annual prevalence and incidence of CTS

| <b>Year</b> | <b>Age sex standardised prevalence (per 10,000 person years, 95% CI)</b> | <b>Age sex standardised incidence (per 10,000 person years, 95% CI)</b> |
|-------------|--------------------------------------------------------------------------|-------------------------------------------------------------------------|
| 1993        | 26.27 (26.13 – 26.42)                                                    | 19.95 (19.83 – 20.07)                                                   |
| 1994        | 26.83 (26.69 – 26.98)                                                    | 20.46 (20.34 – 20.59)                                                   |
| 1995        | 25.90 (25.77 – 26.05)                                                    | 19.20 (19.08 – 19.33)                                                   |
| 1996        | 25.64 (25.50 – 25.78)                                                    | 19.61 (19.49 – 19.74)                                                   |
| 1997        | 24.64 (24.20 – 25.07)                                                    | 19.42 (19.30 – 19.55)                                                   |
| 1998        | 25.42 (25.88 – 25.56)                                                    | 20.05 (19.93 – 20.18)                                                   |
| 1999        | 24.57 (24.44 – 24.71)                                                    | 19.51 (19.39 – 19.64)                                                   |
| 2000        | 24.77 (24.63 – 24.91)                                                    | 19.73 (19.61 – 19.86)                                                   |
| 2001        | 26.22 (26.08 – 26.36)                                                    | 20.75 (20.63 – 20.88)                                                   |
| 2002        | 28.22 (28.07 – 28.37)                                                    | 22.22 (22.10 – 22.36)                                                   |
| 2003        | 30.81 (30.65 – 30.96)                                                    | 24.28 (24.15 – 24.42)                                                   |
| 2004        | 33.51 (33.35 – 33.67)                                                    | 27.00 (26.86 – 27.14)                                                   |
| 2005        | 32.98 (32.82 – 33.14)                                                    | 24.56 (24.42 – 24.70)                                                   |
| 2006        | 32.55 (32.39 – 32.70)                                                    | 24.14 (24.00 – 24.27)                                                   |
| 2007        | 33.48 (33.32 – 33.64)                                                    | 25.52 (25.38 – 25.66)                                                   |
| 2008        | 35.59 (35.43 – 25.76)                                                    | 27.07 (26.92 – 27.21)                                                   |
| 2009        | 36.81 (36.64 – 36.98)                                                    | 28.19 (28.05 – 28.34)                                                   |
| 2010        | 36.40 (36.24 – 36.66)                                                    | 27.53 (27.39 – 27.68)                                                   |
| 2011        | 35.28 (35.12 – 35.44)                                                    | 26.59 (26.45 – 26.74)                                                   |
| 2012        | 35.50 (35.34 – 35.67)                                                    | 26.75 (26.61 – 26.89)                                                   |
| 2013        | 35.45 (35.29 – 35.61)                                                    | 26.34 (26.01 – 26.49)                                                   |

Suppl. Table 2. Demographics of the crude prevalent population presenting with CTS in each calendar year

| Year        | Female median age<br>(25% - 75%<br>Interquartile range) | Male median age<br>(25% - 75%<br>Interquartile range) |
|-------------|---------------------------------------------------------|-------------------------------------------------------|
| <b>1993</b> | 49 (38 – 62)                                            | 53 (42 – 66)                                          |
| <b>1994</b> | 49 (39 – 62)                                            | 53 (42 – 66)                                          |
| <b>1995</b> | 50 (39 – 62)                                            | 52 (41 – 64)                                          |
| <b>1996</b> | 50 (40 – 62)                                            | 53 (41 – 66)                                          |
| <b>1997</b> | 51 (40 – 62)                                            | 53 (42 – 67)                                          |
| <b>1998</b> | 51 (40 – 62)                                            | 54 (43 – 67)                                          |
| <b>1999</b> | 51 (40 – 62)                                            | 54 (44 – 66)                                          |
| <b>2000</b> | 52 (41 – 64)                                            | 55 (44 – 67)                                          |
| <b>2001</b> | 53 (42 – 65)                                            | 55 (44 – 68)                                          |
| <b>2002</b> | 53 (41 – 64)                                            | 55 (44 – 67)                                          |
| <b>2003</b> | 54 (42 – 65)                                            | 55 (44 – 68)                                          |
| <b>2004</b> | 55 (43 – 65)                                            | 56 (45 – 68)                                          |
| <b>2005</b> | 54 (43 – 65)                                            | 58 (45 – 70)                                          |
| <b>2006</b> | 54 (43 – 66)                                            | 58 (45 – 70)                                          |
| <b>2007</b> | 54 (42 – 66)                                            | 54 (42 – 66)                                          |
| <b>2008</b> | 54 (43 – 66)                                            | 58 (46 – 70)                                          |
| <b>2009</b> | 54 (43 – 67)                                            | 58 (47 – 70)                                          |
| <b>2010</b> | 54 (43 – 67)                                            | 57 (46 – 71)                                          |
| <b>2011</b> | 54 (43 – 67)                                            | 58 (47 – 71)                                          |
| <b>2012</b> | 54 (43 – 67)                                            | 59 (48 – 71)                                          |

Suppl. Table 3. Demographics of the crude incident population presenting with CTS in each calendar year

| <b>Year</b> | <b>Female median age<br/>(25% - 75%<br/>Interquartile range)</b> | <b>Male median age<br/>(25% - 75%<br/>Interquartile range)</b> |
|-------------|------------------------------------------------------------------|----------------------------------------------------------------|
| 1993        | 50 (39 – 63)                                                     | 51 (42 – 65)                                                   |
| 1994        | 50 (40 – 63)                                                     | 53 (43 – 66)                                                   |
| 1995        | 51 (40 – 63)                                                     | 53 (42 – 64)                                                   |
| 1996        | 51 (40 – 64)                                                     | 52 (41 – 65)                                                   |
| 1997        | 51 (40 – 64)                                                     | 55 (45 – 67)                                                   |
| 1998        | 51 (40 – 63)                                                     | 54 (44 – 68)                                                   |
| 1999        | 52 (41 – 64)                                                     | 55 (45 – 67)                                                   |
| 2000        | 53 (42 – 65)                                                     | 55 (44 – 68)                                                   |
| 2001        | 53 (42 – 66)                                                     | 55 (45 – 68)                                                   |
| 2002        | 54 (42 – 66)                                                     | 55 (44 – 67)                                                   |
| 2003        | 55 (43 – 66)                                                     | 56 (45 – 68)                                                   |
| 2004        | 55 (44 – 66)                                                     | 57 (45 – 68)                                                   |
| 2005        | 55 (43 – 66)                                                     | 58 (46 – 70)                                                   |
| 2006        | 55 (44 – 67)                                                     | 58 (46 – 70)                                                   |
| 2007        | 54 (43 – 66)                                                     | 58 (47 – 70)                                                   |
| 2008        | 55 (44 – 67)                                                     | 58 (47 – 70)                                                   |
| 2009        | 55 (44 – 67)                                                     | 59 (47 – 71)                                                   |

Suppl. Table 4 The crude prevalence of CTS by age and gender

| Prevalence by age and gender | 1993      | 1994      | 1995      | 1996      | 1997      | 1998      | 1999      | 2000      | 2001      | 2002      | 2003      | 2004      | 2005      | 2006      | 2007      | 2008      | 2009      | 2010      | 2011      | 2012      | 2013      |
|------------------------------|-----------|-----------|-----------|-----------|-----------|-----------|-----------|-----------|-----------|-----------|-----------|-----------|-----------|-----------|-----------|-----------|-----------|-----------|-----------|-----------|-----------|
| Female 18-29                 | 14.6<br>6 | 15.2<br>2 | 16.7<br>2 | 14.6<br>0 | 13.9<br>7 | 13.7<br>4 | 11.9<br>8 | 10.7<br>1 | 9.78      | 11.8<br>7 | 13.4<br>4 | 13.2<br>3 | 13.2<br>8 | 13.0<br>2 | 13.4<br>6 | 13.4<br>9 | 15.5<br>4 | 14.8<br>4 | 14.3<br>0 | 14.4<br>8 | 13.7<br>9 |
| Female 30-39                 | 42.2<br>1 | 36.8<br>7 | 37.3<br>7 | 36.0<br>4 | 33.5<br>7 | 36.3<br>4 | 34.2<br>0 | 31.9<br>4 | 32.5<br>5 | 36.5<br>7 | 38.2<br>1 | 38.9<br>7 | 39.6<br>7 | 39.3<br>4 | 41.9<br>8 | 42.9<br>9 | 45.1<br>5 | 44.3<br>4 | 41.8<br>7 | 41.2<br>4 | 38.7<br>8 |
| Female 40-49                 | 50.0<br>8 | 53.4<br>6 | 44.7<br>5 | 49.9<br>5 | 46.0<br>4 | 49.2<br>5 | 43.9<br>1 | 43.8<br>8 | 43.5<br>7 | 46.2<br>2 | 47.2<br>3 | 49.5<br>1 | 48.6<br>6 | 47.8<br>0 | 52.3<br>7 | 55.6<br>7 | 54.9<br>0 | 54.8<br>4 | 53.8<br>7 | 56.7<br>1 | 53.9<br>4 |
| Female 50-59                 | 59.4<br>6 | 56.0<br>2 | 57.7<br>1 | 56.7<br>8 | 55.4<br>6 | 56.2<br>3 | 57.8<br>7 | 54.9<br>4 | 58.4<br>0 | 61.4<br>1 | 71.3<br>9 | 78.4<br>1 | 76.7<br>1 | 73.2<br>9 | 70.7<br>7 | 73.8<br>7 | 75.4<br>4 | 73.4<br>6 | 70.4<br>8 | 67.6<br>7 | 70.6<br>0 |
| Female 60-69                 | 31.2<br>6 | 36.0<br>3 | 32.4<br>7 | 32.6<br>0 | 28.0<br>6 | 33.3<br>4 | 31.9<br>1 | 33.9<br>2 | 37.7<br>1 | 40.1<br>0 | 47.6<br>4 | 56.9<br>2 | 52.1<br>6 | 50.2<br>3 | 48.6<br>1 | 56.2<br>1 | 55.1<br>9 | 54.0<br>1 | 50.2<br>1 | 48.9<br>2 | 50.4<br>8 |
| Female 70+                   | 33.1<br>3 | 31.2<br>8 | 33.5<br>3 | 32.6<br>5 | 32.4<br>4 | 31.4<br>0 | 31.7<br>6 | 34.1<br>3 | 37.5<br>2 | 39.9<br>2 | 44.9<br>7 | 49.0<br>8 | 49.7<br>3 | 53.2<br>8 | 52.8<br>5 | 55.8<br>5 | 61.0<br>6 | 59.9<br>6 | 59.4<br>7 | 58.2<br>5 | 58.0<br>5 |
| Male 18-29                   | 5.04      | 4.00      | 3.93      | 4.00      | 3.55      | 2.78      | 2.88      | 2.42      | 2.74      | 2.80      | 3.22      | 3.69      | 3.34      | 3.31      | 3.95      | 3.70      | 3.41      | 3.76      | 4.36      | 4.21      | 4.12      |
| Male 30-39                   | 9.95      | 11.0<br>2 | 11.3<br>6 | 11.1<br>9 | 11.1<br>1 | 10.6<br>0 | 8.61      | 10.3<br>2 | 10.7<br>8 | 11.7<br>5 | 12.0<br>0 | 13.0<br>6 | 12.2<br>3 | 11.5<br>7 | 11.3<br>0 | 11.7<br>8 | 12.1<br>7 | 12.9<br>4 | 11.6<br>7 | 12.2<br>9 | 12.5<br>5 |
| Male 40-49                   | 15.8<br>5 | 17.5<br>9 | 17.6<br>5 | 15.3<br>0 | 16.0<br>0 | 16.3<br>3 | 16.7<br>3 | 16.8<br>1 | 17.7<br>1 | 20.1<br>5 | 20.1<br>8 | 22.0<br>4 | 20.0<br>2 | 18.4<br>5 | 21.0<br>6 | 23.1<br>4 | 22.9<br>3 | 24.8<br>7 | 23.0<br>6 | 23.2<br>1 | 22.5<br>8 |
| Male 50-59                   | 18.7<br>2 | 21.6<br>6 | 21.0<br>8 | 20.2<br>3 | 20.3<br>6 | 19.0<br>3 | 19.5<br>1 | 19.6<br>4 | 22.1<br>2 | 24.4<br>6 | 25.7<br>1 | 26.6<br>8 | 26.5<br>5 | 26.6<br>2 | 28.0<br>9 | 29.9<br>0 | 31.0<br>6 | 30.8<br>6 | 31.1<br>6 | 28.6<br>4 | 32.0<br>1 |
| Male 60-69                   | 17.6<br>4 | 19.9<br>2 | 16.2<br>2 | 16.7<br>8 | 15.6<br>8 | 17.6<br>2 | 19.2<br>7 | 19.9<br>9 | 22.9<br>1 | 23.9<br>3 | 24.6<br>1 | 29.0<br>8 | 28.7<br>1 | 28.8<br>7 | 30.7<br>3 | 31.5<br>9 | 34.8<br>1 | 31.4<br>1 | 31.7<br>1 | 34.8<br>4 | 34.7<br>5 |
| Male 70+                     | 20.9<br>5 | 24.1<br>2 | 22.1<br>6 | 21.6<br>9 | 23.7<br>1 | 23.6<br>5 | 22.1<br>1 | 25.8<br>6 | 27.9<br>3 | 28.4<br>3 | 31.6<br>5 | 34.5<br>1 | 37.9<br>1 | 37.7<br>6 | 39.1<br>6 | 43.1<br>9 | 44.9<br>3 | 45.6<br>0 | 46.3<br>3 | 46.0<br>5 | 49.1<br>4 |

Suppl. Table 5 The crude incidence of CTS by age and gender

| Incidence by age and gender | 1993  | 1994  | 1995  | 1996  | 1997  | 1998  | 1999  | 2000  | 2001  | 2002  | 2003  | 2004  | 2005  | 2006  | 2007  | 2008  | 2009  | 2010  | 2011  | 2012  | 2013  |
|-----------------------------|-------|-------|-------|-------|-------|-------|-------|-------|-------|-------|-------|-------|-------|-------|-------|-------|-------|-------|-------|-------|-------|
| Female 18-29                | 12.69 | 12.69 | 12.84 | 12.88 | 11.45 | 12.32 | 11.77 | 10.14 | 8.63  | 10.23 | 11.54 | 12.26 | 10.70 | 10.48 | 11.61 | 9.96  | 13.90 | 12.19 | 11.55 | 11.89 | 10.68 |
| Female 30-39                | 31.40 | 28.58 | 28.00 | 27.62 | 28.09 | 30.09 | 27.83 | 25.88 | 27.18 | 28.31 | 30.31 | 33.31 | 30.53 | 30.06 | 32.17 | 33.13 | 34.97 | 33.96 | 32.51 | 31.72 | 28.69 |
| Female 40-49                | 38.43 | 37.75 | 33.08 | 36.31 | 35.17 | 37.42 | 31.74 | 34.72 | 34.05 | 34.94 | 35.63 | 37.37 | 36.27 | 35.62 | 40.06 | 42.51 | 40.89 | 40.86 | 40.05 | 42.06 | 39.50 |
| Female 50-59                | 39.86 | 41.02 | 41.93 | 40.82 | 41.44 | 43.24 | 44.70 | 42.33 | 43.94 | 46.44 | 54.52 | 61.11 | 54.56 | 52.25 | 58.55 | 54.70 | 56.14 | 54.10 | 51.62 | 50.07 | 50.97 |
| Female 60-69                | 25.54 | 29.79 | 24.64 | 25.70 | 25.08 | 26.41 | 26.43 | 26.86 | 30.23 | 32.54 | 39.12 | 46.20 | 38.44 | 36.30 | 31.00 | 42.47 | 42.24 | 41.87 | 37.74 | 35.80 | 37.32 |
| Female 70+                  | 24.45 | 22.29 | 24.21 | 25.28 | 26.17 | 25.09 | 25.25 | 27.67 | 29.29 | 32.87 | 34.96 | 39.57 | 37.78 | 39.60 | 39.13 | 41.89 | 46.03 | 44.89 | 44.46 | 42.29 | 43.53 |
| Male 18-29                  | 3.58  | 3.69  | 3.09  | 3.02  | 2.32  | 2.29  | 2.35  | 1.44  | 2.24  | 2.75  | 2.60  | 3.14  | 2.60  | 2.58  | 3.33  | 3.13  | 2.77  | 3.00  | 3.56  | 3.51  | 3.35  |
| Male 30-39                  | 9.09  | 8.63  | 8.63  | 10.67 | 7.82  | 8.45  | 5.92  | 8.74  | 8.60  | 10.01 | 10.72 | 11.28 | 9.76  | 8.80  | 9.53  | 9.16  | 9.90  | 10.30 | 9.19  | 9.67  | 9.72  |
| Male 40-49                  | 14.23 | 14.35 | 12.63 | 11.83 | 11.86 | 12.41 | 13.43 | 13.26 | 14.39 | 16.32 | 16.08 | 17.78 | 14.28 | 14.25 | 16.36 | 18.23 | 17.76 | 19.58 | 17.15 | 18.13 | 17.63 |
| Male 50-59                  | 13.90 | 17.40 | 17.11 | 15.36 | 16.26 | 15.17 | 16.54 | 15.87 | 18.00 | 18.59 | 19.87 | 21.36 | 20.23 | 20.02 | 22.30 | 23.69 | 23.38 | 23.91 | 23.51 | 24.40 | 25.45 |
| Male 60-69                  | 13.62 | 15.14 | 11.42 | 12.22 | 13.02 | 13.48 | 15.58 | 15.96 | 18.78 | 18.49 | 19.80 | 23.71 | 21.12 | 21.81 | 23.95 | 24.79 | 27.56 | 23.24 | 24.59 | 27.90 | 26.23 |

1  
2  
3  
4  
5  
6  
7  
8  
9  
10  
11  
12  
13  
14  
15  
16  
17  
18  
19  
20  
21  
22  
23  
24  
25  
26  
27  
28  
29  
30  
31  
32  
33  
34  
35  
36  
37  
38  
39  
40  
41  
42  
43  
44  
45  
46

|          |       |      |      |      |      |      |      |      |      |      |      |      |      |      |      |      |      |      |      |      |      |
|----------|-------|------|------|------|------|------|------|------|------|------|------|------|------|------|------|------|------|------|------|------|------|
| Male 70+ | 14.88 | 18.3 | 15.7 | 16.6 | 18.3 | 18.0 | 17.2 | 19.2 | 20.5 | 21.9 | 24.7 | 27.2 | 27.9 | 26.9 | 29.6 | 31.8 | 33.8 | 32.5 | 33.2 | 33.7 | 33.8 |
|          |       | 8    | 2    | 4    | 4    | 6    | 9    | 7    | 3    | 5    | 1    | 4    | 2    | 4    | 7    | 4    | 1    | 2    | 3    | 8    | 3    |

For peer review only

Suppl. Table 6 Comparison of population studies reporting the prevalence and / or incidence of carpal tunnel syndrome

| Study Identifier                     | Study method                                                                                                                                                                                                                                                                                                                                                       | Definition of CTS                                                                                                                                                                                                                                                            | Comments                                                                                                                            |
|--------------------------------------|--------------------------------------------------------------------------------------------------------------------------------------------------------------------------------------------------------------------------------------------------------------------------------------------------------------------------------------------------------------------|------------------------------------------------------------------------------------------------------------------------------------------------------------------------------------------------------------------------------------------------------------------------------|-------------------------------------------------------------------------------------------------------------------------------------|
| De Krom et al. 1992                  | Survey of a random age sex stratified sample of the general population taken from the population register of Maastricht between 1983 and 1985                                                                                                                                                                                                                      | Questionnaire based on symptoms and signs                                                                                                                                                                                                                                    | [1]                                                                                                                                 |
| Ferry et al. 1998                    | <p>i) Cross sectional survey to estimate the point prevalence of hand symptoms (from a random sample of 1000 individuals from the UK general population, aged 18 to 75 years) and</p> <p>ii) nerve conduction testing of a weighted sample</p> <ul style="list-style-type: none"> <li>- Circa. 1998 (not stated)</li> <li>- point prevalence determined</li> </ul> | Based on nerve conduction studies using defined cut offs                                                                                                                                                                                                                     | Subjects over 54yrs had a higher prevalence than younger participants. No difference between genders was noted.[2]                  |
| Nordstrom et al. 1998                | Prospective study conducted in the general population of the Marshfield Epidemiologic Study Area, Wisconsin, between 1991 and 1993                                                                                                                                                                                                                                 | <ol style="list-style-type: none"> <li>1. any diagnosis of possible, probable or definite CTS;</li> <li>2. any diagnosis of probable or definite CTS; and</li> <li>3. any diagnosis of possible, probable or definite CTS plus at least one of six clinical signs</li> </ol> | A 3.5 fold increase in CTS incidence was noted compared with data from 20 years previously in the same study population[3]          |
| Atroshi et al. 2000                  | Survey of a random sample of the age sex stratified general population of Southern Sweden, in 1997                                                                                                                                                                                                                                                                 | Diagnosis based on clinical examination and positive electrophysiological findings                                                                                                                                                                                           | The population prevalence of symptoms was 14.4%; the prevalence of clinically and electrophysiologically confirmed CTS was 2.7% [4] |
| Papanicolaou, McCable & Firrell 2001 | Cross-sectional study to evaluate prevalence of carpal tunnel syndrome in the General population of the United States                                                                                                                                                                                                                                              | Katz hand diagram                                                                                                                                                                                                                                                            | After correcting for nonresponders the lowest possible estimate of CTS was 3.72% [5]                                                |



|                                                           |                                    |                                                                                                                                                                                                |                                                                                                                                                                          |                                                                                                                                                                                                                             |
|-----------------------------------------------------------|------------------------------------|------------------------------------------------------------------------------------------------------------------------------------------------------------------------------------------------|--------------------------------------------------------------------------------------------------------------------------------------------------------------------------|-----------------------------------------------------------------------------------------------------------------------------------------------------------------------------------------------------------------------------|
| 1<br>2<br>3<br>4                                          | Mondelli, Giannini & Giacchi 2002  | Prospective study of patients referred to four electrodiagnostic laboratories in the Siena area, Italy. Mean annual incidence calculated from time period 1991 to 1998                         | Diagnosis based on clinical history and electrodiagnostic evidence of a reduced distal conduction velocity of the median nerve (American Academy of Neurology standards) | Of the patients presenting 79.7% were women. The mean age at diagnosis was 55.0 +/- 14.4 years (range 16 to 97) [6]                                                                                                         |
| 5<br>6<br>7<br>8<br>9<br>10<br>11<br>12<br>13<br>14<br>15 | Bland, Rudolfer 2003               | Prospective collection of neurophysiological and clinical data of patients referred to two electromyography clinics in the UK between 1991 to 1993 and 1992 to 2001                            | Based on nerve conduction studies using defined cut offs                                                                                                                 | An increase in diagnosed cases was observed between the two data collection periods; attributed to referral of milder cases. Median nerve impairment was more severe in the elderly and men at all ages. [7]                |
| 16<br>17<br>18<br>19<br>20<br>21                          | Latinovic, Gulliford & Hughes 2006 | Population study based in a general practice database of consulting primary care patients from 253 practices between January 1992 and 31 December 2000.                                        | Read and Oxmis codes for carpal tunnel syndrome                                                                                                                          | Most frequent in women aged 45-54. In 2000 operative treatment was undertaken for 31% of incident CTS presentations [8]                                                                                                     |
| 22<br>23<br>24<br>25<br>26<br>27                          | Bonger et al. 2007                 | Analysis of the first and second Dutch National Survey of General Practice, conducted in 1987 and 2001                                                                                         | (International Classification of Primary Care) ICPC coded diagnosis                                                                                                      | A crude increase in incidence over time was not statistically significant after subdividing by age and sex. Incidence rates were related to the job level in women, but not men [9]                                         |
| 28<br>29<br>30<br>31<br>32<br>33<br>34                    | Dieleman et al. 2008               | Population study based in a general practice database (Integrated Primary Care Information (IPCI) database): data of consulting primary care patients in the Netherlands between 1996 and 2003 | ICPC coded diagnosis                                                                                                                                                     | Neuropathic pain was noted to affect almost 1% of the population. Mononeuropathies and carpal tunnel syndrome were the most common causes [10]                                                                              |
| 35<br>36<br>37<br>38<br>39<br>40                          | Gelfman et al. 2009                | Analysis of medical records linkage system 1981-1985 to 2000-2005 of residents of Olmsted County, Minnesota (Rochester Epidemiology Project)                                                   | Clinical coding with a sample verified by full record review                                                                                                             | An increase in incidence was observed over the study period. An increase in young individuals seeking care for less severe CTS in the mid-1980's was followed in the 1990's by an increasing incidence in older people [11] |

1  
2  
3  
4  
5  
6  
7  
8  
9  
10  
11  
12  
13  
14  
15  
16  
17  
18  
19  
20  
21  
22  
23  
24  
25  
26  
27  
28  
29  
30  
31  
32  
33  
34  
35  
36  
37  
38  
39  
40  
41  
42  
43  
44  
45  
46

---

|                      |                                                                                                                                                             |                                                                                                                                                                         |                                                                                                                                                                                                                                                                                                                                      |
|----------------------|-------------------------------------------------------------------------------------------------------------------------------------------------------------|-------------------------------------------------------------------------------------------------------------------------------------------------------------------------|--------------------------------------------------------------------------------------------------------------------------------------------------------------------------------------------------------------------------------------------------------------------------------------------------------------------------------------|
| Atroschi et al. 2011 | Analysis of the Skane Health Care Register (SCHR) (inhabitants presenting to public health providers), incident cases identified between 2006 - 2008        | Physician diagnosed                                                                                                                                                     | [12]                                                                                                                                                                                                                                                                                                                                 |
| Jenkins et al. 2012b | Prospective audit of patients referred to a regional hand service based in secondary care in Scotland between November 2004 and May 2010                    | Symptoms of pain or paraesthesia in the median nerve distribution and one or more of: nerve conduction deficit, thenar muscle wasting or positive Tinel or Phalen signs | Mean age of presentation 55.1years (range 22 to 96, SD 13.5 years). Mean body mass index at presentation 29.5 kg/m2<br>CTS more common in: females (OR 1.9, 95% CI 1.5 to 2.5)<br>Incidence varied significantly between deprivation groups: most deprived 81/100,000 and least deprived 62/100,000 (OR 1.3, 95% CI 1.1 to 1.6) [13] |
| Jenkins et al. 2013  | Prospective audit of patients referred to a regional hand service based in secondary care in Scotland between November 2004 and May 2010, who were employed | Clinical diagnosis based on history and examination, in most cases substantiated by nerve conduction studies                                                            | The greatest incidence as in caring and leisure occupations (197 per 100,000) and the lowest incidence was in the associate professional group (37 per 100,000) [14]                                                                                                                                                                 |
| Dale 2013            | Pooled analysis of six prospective studies collecting data from >50 workplaces, over variable time frames                                                   | A pooled case definition was derived to include clinical and electrodiagnostic criteria                                                                                 | 7.8% of 4321 subjects studied had prevalent CTS, with an additional 204 subjects meeting the CTS criteria, leading to an incidence of 2.3 cases per 100 person years [15]                                                                                                                                                            |

---

1 de Krom MC, Knipschild PG, Kester AD, et al. Carpal tunnel syndrome: prevalence in the general population. *J Clin Epidemiol* 1992;45:373-6.

2 Ferry S, Pritchard T, Keenan J, et al. Estimating the prevalence of delayed median nerve conduction in the general population. *Br J Rheumatol* 1998;37:630-5.

3 Nordstrom DL, DeStefano F, Vierkant RA, et al. Incidence of diagnosed carpal tunnel syndrome in a general population. *Epidemiology* 1998;9:342-5.

- 1  
2  
3 4 Atroshi I. Carpal tunnel syndrome--prevalence, electrodiagnosis and outcome instruments. *Acta Orthop Scand* 1999;70:70-1.  
4  
5 5 Papanicolaou GD, McCabe SJ, Firrell J. The prevalence and characteristics of nerve compression symptoms in the general population. *Journal of Hand*  
6 *Surgery - American Volume* 2001;26:460-6.  
7  
8 6 Mondelli M, Giannini F, Giacchi M. Carpal tunnel syndrome incidence in a general population. *Neurology* 2002;58:289-94.  
9  
10 7 Bland JDP, Rudolfer SM. Clinical surveillance of carpal tunnel syndrome in two areas of the United Kingdom, 1991–2001. *Journal of Neurology,*  
11 *Neurosurgery & Psychiatry* 2003;74:1674-9 doi:10.1136/jnnp.74.12.1674.  
12  
13 8 Latinovic R, Gulliford MC, Hughes RA. Incidence of common compressive neuropathies in primary care. *J Neurol Neurosurg Psychiatry* 2006;77:263-5  
14 doi:10.1136/jnnp.2005.066696.  
15  
16 9 Bongers FJ, Schellevis FG, van den Bosch WJ, et al. Carpal tunnel syndrome in general practice (1987 and 2001): incidence and the role of occupational and  
17 non-occupational factors. *Br J Gen Pract* 2007;57:36-9.  
18  
19 10 Dieleman JP, Kerklaan J, Huygen FJ, et al. Incidence rates and treatment of neuropathic pain conditions in the general population. *Pain* 2008;137:681-8  
20 doi:10.1016/j.pain.2008.03.002 [doi].  
21  
22 11 Gelfman R, Melton LJ, 3rd, Yawn BP, et al. Long-term trends in carpal tunnel syndrome. *Neurology* 2009;72:33-41  
23 doi:10.1212/01.wnl.0000338533.88960.b9; 10.1212/01.wnl.0000338533.88960.b9.  
24  
25 12 Atroshi I, Englund M, Turkiewicz A, et al. Incidence of physician-diagnosed carpal tunnel syndrome in the general population. *Arch Intern Med*  
26 2011;171:943-5.  
27  
28 13 Jenkins PJ, Watts AC, Duckworth AD, et al. Socioeconomic deprivation and the epidemiology of carpal tunnel syndrome. *Journal of Hand Surgery-*  
29 *European Volume* 2012;37E:123-9 doi:10.1177/1753193411419952.  
30  
31 14 Jenkins PJ, Srikantharajah D, Duckworth AD, et al. Carpal tunnel syndrome: the association with occupation at a population level. *Journal of Hand*  
32 *Surgery-European Volume* 2013;38E:67-72 doi:10.1177/1753193412455790.  
33  
34 15 Dale AM, Harris-Adamson C, Rempel D, et al. Prevalence and incidence of carpal tunnel syndrome in US working populations: Pooled analysis of six  
35 prospective studies. *Scandinavian Journal of Work, Environment and Health* 2013;39:495-505.  
36  
37  
38  
39  
40  
41  
42  
43  
44  
45  
46

1  
2  
3  
4  
5  
6  
7  
8  
9  
10  
11  
12  
13  
14  
15  
16  
17  
18  
19  
20  
21  
22  
23  
24  
25  
26  
27  
28  
29  
30  
31  
32  
33  
34  
35  
36  
37  
38  
39  
40  
41  
42  
43  
44  
45  
46

For peer review only

Suppl. Table 7 summary of reported prevalence and incidence by gender

| Study Identifier                        | Country of Origin<br>Data collection<br>(Prevalence or<br>Incidence) | Prevalence or<br>Incidence per<br>100,000, per annum |        |      | Female / male ratio |
|-----------------------------------------|----------------------------------------------------------------------|------------------------------------------------------|--------|------|---------------------|
|                                         |                                                                      | All                                                  | Female | Male |                     |
| De Krom et al. 1992                     | The Netherlands<br>1983 - July 1985<br>(Prevalence)                  | 5700                                                 | 5800   | 600  | 9.66                |
| Atroshi et al. 2000                     | Sweden<br>1997<br>(Prevalence)                                       | 3800                                                 | 4600   | 2800 | 1.64                |
| Papanicolaou,<br>McCable & Firrell 2001 | United States<br>2001<br>(Prevalence)                                | 3720                                                 |        |      | 4.8                 |
| Ferry et al. 1998                       | United Kingdom<br>Not stated<br>(Incidence)                          | 8200                                                 | 6400   | 8200 | 0.78                |
| Nordstrom et al. 1998                   | United States<br>1991 - 1993<br>(Incidence)                          | 346                                                  | 373    | 318  | 1.17                |
| Mondelli, Giannini &<br>Giacchi 2002    | Italy<br>1991 – 1998 (mean)<br>(Incidence)                           | 276                                                  | 506    | 139  | 3.64                |
| Bland, Rudolfer 2003                    | Kent, UK<br>1991 - 2001<br>(Incidence)                               | 105                                                  | 120.5  | 60   | 2                   |
|                                         | Huddersfield, UK                                                     |                                                      | 61.5   | 30   | 2                   |

1  
2  
3  
4  
5  
6  
7  
8  
9  
10  
11  
12  
13  
14  
15  
16  
17  
18  
19  
20  
21  
22  
23  
24  
25  
26  
27  
28  
29  
30  
31  
32  
33  
34  
35  
36  
37  
38  
39  
40  
41  
42  
43  
44  
45  
46

---

|                                    |                                         |       |       |      |      |
|------------------------------------|-----------------------------------------|-------|-------|------|------|
| Latinovic, Gulliford & Hughes 2006 | United Kingdom (Incidence)              |       | 192.8 | 87.8 | 2.23 |
| Bongers et al. 2007                | The Netherlands (Incidence) 1987        | 130   | 190   | 60   | 3.17 |
|                                    | 2001                                    | 180   | 280   | 90   | 3.11 |
| Dieleman et al. 2008               | The Netherlands 1996 - 2003 (Incidence) | 233.1 |       |      |      |
| Gelfman et al. 2009                | United States (Incidence) 1981-1985     | 258   | 337   | 177  | 1.90 |
|                                    | 2001-2005                               | 424   | 542   | 303  | 1.79 |
| Atroshi et al. 2011                | Sweden 2006 - 2008 (Incidence)          |       | 428   | 182  | 2.35 |
| Jenkins et al. 2012b               | Scotland 2004 - 2010 (Incidence)        | 72    | 98    | 43   | 2.28 |
| Jenkins et al. 2013                | Scotland 2004 - 2010 (Incidence)        | 103   |       |      |      |
| Dale 2013                          | United States (Incidence)               | 2300  |       |      |      |

---

## STROBE Statement—checklist of items that should be included in reports of observational studies

|                              | Item No | Recommendation                                                                                                                                                                                                                                                                                                                                                                                                                                                         | Page |
|------------------------------|---------|------------------------------------------------------------------------------------------------------------------------------------------------------------------------------------------------------------------------------------------------------------------------------------------------------------------------------------------------------------------------------------------------------------------------------------------------------------------------|------|
| <b>Title and abstract</b>    | 1       | (a) Indicate the study's design with a commonly used term in the title or the abstract                                                                                                                                                                                                                                                                                                                                                                                 | 1-2  |
|                              |         | (b) Provide in the abstract an informative and balanced summary of what was done and what was found                                                                                                                                                                                                                                                                                                                                                                    | 1-2  |
| <b>Introduction</b>          |         |                                                                                                                                                                                                                                                                                                                                                                                                                                                                        |      |
| Background/rationale         | 2       | Explain the scientific background and rationale for the investigation being reported                                                                                                                                                                                                                                                                                                                                                                                   | 4    |
| Objectives                   | 3       | State specific objectives, including any prespecified hypotheses                                                                                                                                                                                                                                                                                                                                                                                                       | 4-5  |
| <b>Methods</b>               |         |                                                                                                                                                                                                                                                                                                                                                                                                                                                                        |      |
| Study design                 | 4       | Present key elements of study design early in the paper                                                                                                                                                                                                                                                                                                                                                                                                                | 5    |
| Setting                      | 5       | Describe the setting, locations, and relevant dates, including periods of recruitment, exposure, follow-up, and data collection                                                                                                                                                                                                                                                                                                                                        | 5-6  |
| Participants                 | 6       | (a) <i>Cohort study</i> —Give the eligibility criteria, and the sources and methods of selection of participants. Describe methods of follow-up<br><i>Case-control study</i> —Give the eligibility criteria, and the sources and methods of case ascertainment and control selection. Give the rationale for the choice of cases and controls<br><i>Cross-sectional study</i> —Give the eligibility criteria, and the sources and methods of selection of participants | 5-6  |
|                              |         | (b) <i>Cohort study</i> —For matched studies, give matching criteria and number of exposed and unexposed<br><i>Case-control study</i> —For matched studies, give matching criteria and the number of controls per case                                                                                                                                                                                                                                                 |      |
| Variables                    | 7       | Clearly define all outcomes, exposures, predictors, potential confounders, and effect modifiers. Give diagnostic criteria, if applicable                                                                                                                                                                                                                                                                                                                               | 5-6  |
| Data sources/<br>measurement | 8*      | For each variable of interest, give sources of data and details of methods of assessment (measurement). Describe comparability of assessment methods if there is more than one group                                                                                                                                                                                                                                                                                   | na   |
| Bias                         | 9       | Describe any efforts to address potential sources of bias                                                                                                                                                                                                                                                                                                                                                                                                              | na   |
| Study size                   | 10      | Explain how the study size was arrived at                                                                                                                                                                                                                                                                                                                                                                                                                              | na   |
| Quantitative variables       | 11      | Explain how quantitative variables were handled in the analyses. If applicable, describe which groupings were chosen and why                                                                                                                                                                                                                                                                                                                                           | 6-7  |
| Statistical methods          | 12      | (a) Describe all statistical methods, including those used to control for confounding                                                                                                                                                                                                                                                                                                                                                                                  | 6-7  |
|                              |         | (b) Describe any methods used to examine subgroups and interactions                                                                                                                                                                                                                                                                                                                                                                                                    | na   |
|                              |         | (c) Explain how missing data were addressed                                                                                                                                                                                                                                                                                                                                                                                                                            | na   |
|                              |         | (d) <i>Cohort study</i> —If applicable, explain how loss to follow-up was addressed<br><i>Case-control study</i> —If applicable, explain how matching of cases and controls was addressed<br><i>Cross-sectional study</i> —If applicable, describe analytical methods taking account of sampling strategy                                                                                                                                                              | na   |
|                              |         | (e) Describe any sensitivity analyses                                                                                                                                                                                                                                                                                                                                                                                                                                  | 6-7  |

Continued on next page.

**Results**

|                   |     |                                                                                                                                                                                                              |             |
|-------------------|-----|--------------------------------------------------------------------------------------------------------------------------------------------------------------------------------------------------------------|-------------|
| Participants      | 13* | (a) Report numbers of individuals at each stage of study—eg numbers potentially eligible, examined for eligibility, confirmed eligible, included in the study, completing follow-up, and analysed            | Na          |
|                   |     | (b) Give reasons for non-participation at each stage                                                                                                                                                         | Na          |
|                   |     | (c) Consider use of a flow diagram                                                                                                                                                                           | Na          |
| -Descriptive data | 14* | (a) Give characteristics of study participants (eg demographic, clinical, social) and information on exposures and potential confounders                                                                     | 7-9         |
|                   |     | (b) Indicate number of participants with missing data for each variable of interest                                                                                                                          | na          |
|                   |     | (c) <i>Cohort study</i> —Summarise follow-up time (eg, average and total amount)                                                                                                                             | na          |
| Outcome data      | 15* | <i>Cohort study</i> —Report numbers of outcome events or summary measures over time                                                                                                                          |             |
|                   |     | <i>Case-control study</i> —Report numbers in each exposure category, or summary measures of exposure                                                                                                         |             |
|                   |     | <i>Cross-sectional study</i> —Report numbers of outcome events or summary measures                                                                                                                           | 7-9         |
| Main results      | 16  | (a) Give unadjusted estimates and, if applicable, confounder-adjusted estimates and their precision (eg, 95% confidence interval). Make clear which confounders were adjusted for and why they were included | 7-9+ tables |
|                   |     | (b) Report category boundaries when continuous variables were categorized                                                                                                                                    | na          |
|                   |     | (c) If relevant, consider translating estimates of relative risk into absolute risk for a meaningful time period                                                                                             | na          |
| Other analyses    | 17  | Report other analyses done—eg analyses of subgroups and interactions, and sensitivity analyses                                                                                                               | na          |

**Discussion**

|                  |    |                                                                                                                                                                            |       |
|------------------|----|----------------------------------------------------------------------------------------------------------------------------------------------------------------------------|-------|
| Key results      | 18 | Summarise key results with reference to study objectives                                                                                                                   | 12    |
| Limitations      | 19 | Discuss limitations of the study, taking into account sources of potential bias or imprecision. Discuss both direction and magnitude of any potential bias                 | 14    |
| Interpretation   | 20 | Give a cautious overall interpretation of results considering objectives, limitations, multiplicity of analyses, results from similar studies, and other relevant evidence | 12-15 |
| Generalisability | 21 | Discuss the generalisability (external validity) of the study results                                                                                                      | 14    |

**Other information**

|         |    |                                                                                                                                                               |    |
|---------|----|---------------------------------------------------------------------------------------------------------------------------------------------------------------|----|
| Funding | 22 | Give the source of funding and the role of the funders for the present study and, if applicable, for the original study on which the present article is based | 15 |
|---------|----|---------------------------------------------------------------------------------------------------------------------------------------------------------------|----|

\*Give information separately for cases and controls in case-control studies and, if applicable, for exposed and unexposed groups in cohort and cross-sectional studies.

**Note:** An Explanation and Elaboration article discusses each checklist item and gives methodological background and published examples of transparent reporting. The STROBE checklist is best used in conjunction with this article (freely available on the Web sites of PLoS Medicine at <http://www.plosmedicine.org/>, Annals of Internal Medicine at <http://www.annals.org/>, and Epidemiology at <http://www.epidem.com/>). Information on the STROBE Initiative is available at [www.strobe-statement.org](http://www.strobe-statement.org).
