# Supplementary material for: Trends in the prevalence, incidence and surgical management of carpal tunnel syndrome between 1993 and 2013: an observational analysis of UK primary care records
Source: PubMed Central journal article supplement (PMC6020969; doi:10.1136/bmjopen-2017-020166), 2018-06-19
Supplement: bmjopen-2017-020166supp002.pdf [file bmjopen-2017-020166supp002.pdf]

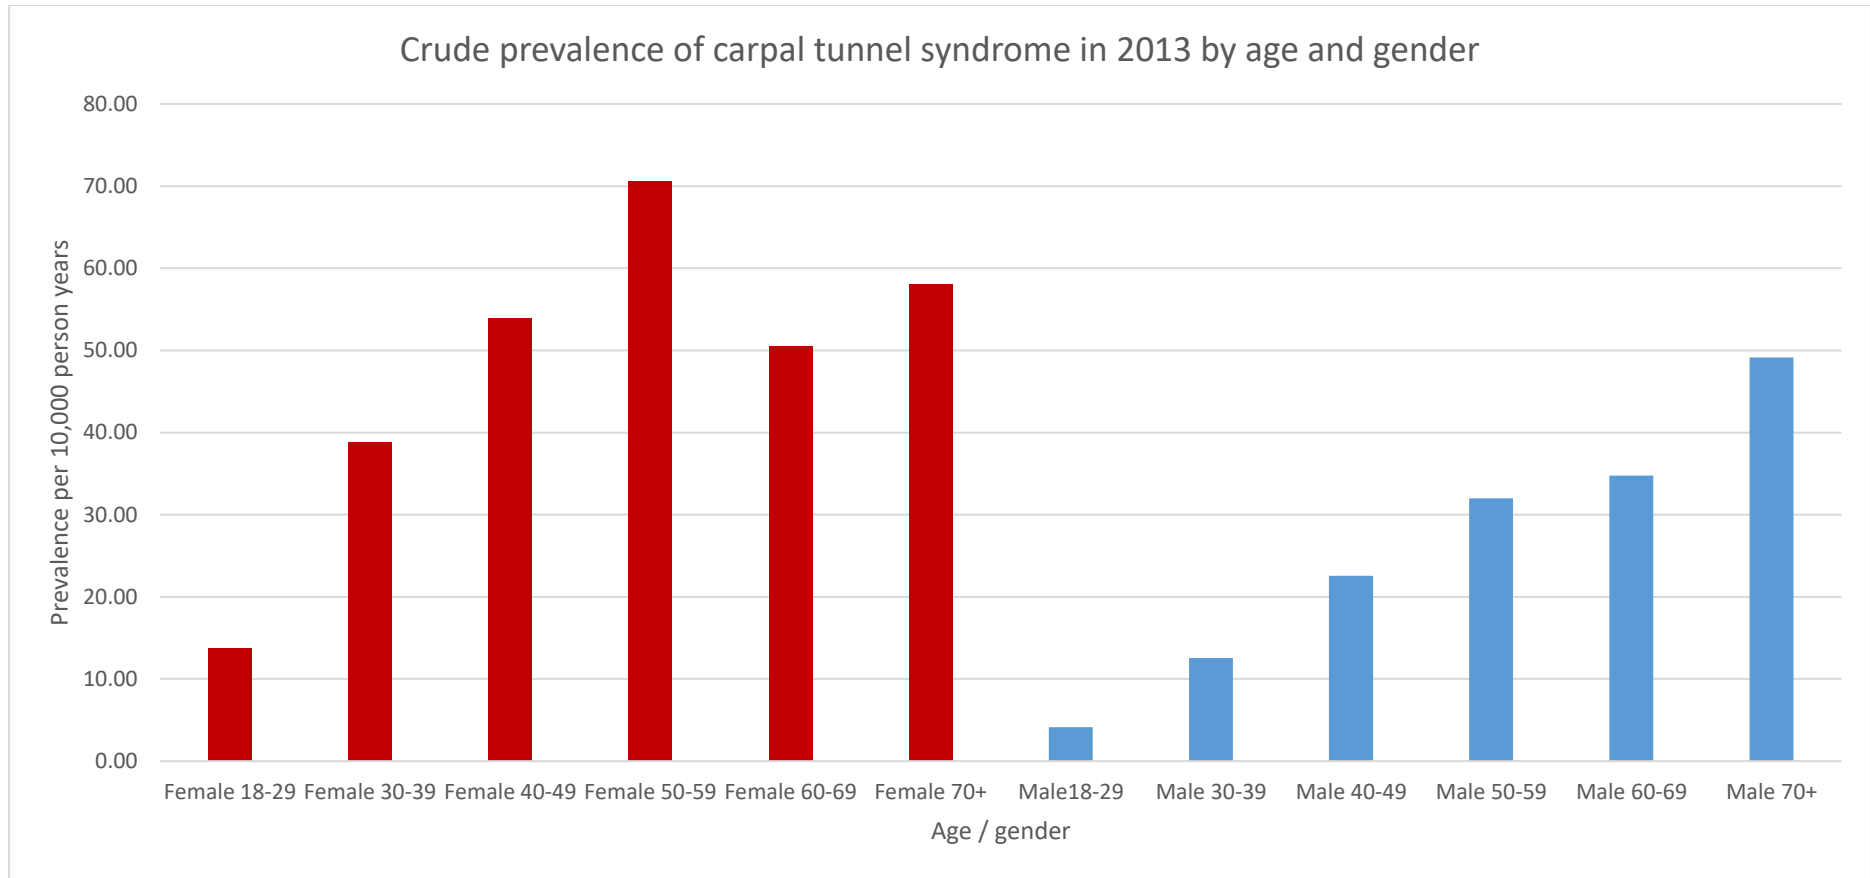

Suppl. Fig 2 Crude prevalence of carpal tunnel syndrome in 2013 by age and gender
