# Supplementary material for: Trends in the prevalence, incidence and surgical management of carpal tunnel syndrome between 1993 and 2013: an observational analysis of UK primary care records
Source: PubMed Central journal article supplement (PMC6020969; doi:10.1136/bmjopen-2017-020166), 2018-06-19
Supplement: bmjopen-2017-020166supp005.pdf [file bmjopen-2017-020166supp005.pdf]

Suppl. Table 1 The age and sex standardised estimates of the annual prevalence and incidence of CTS

| <b>Year</b> | <b>Age sex standardised prevalence (per 10,000 person years, 95% CI)</b> | <b>Age sex standardised incidence (per 10,000 person years, 95% CI)</b> |
|-------------|--------------------------------------------------------------------------|-------------------------------------------------------------------------|
| 1993        | 26.27 (26.13 – 26.42)                                                    | 19.95 (19.83 – 20.07)                                                   |
| 1994        | 26.83 (26.69 – 26.98)                                                    | 20.46 (20.34 – 20.59)                                                   |
| 1995        | 25.90 (25.77 – 26.05)                                                    | 19.20 (19.08 – 19.33)                                                   |
| 1996        | 25.64 (25.50 – 25.78)                                                    | 19.61 (19.49 – 19.74)                                                   |
| 1997        | 24.64 (24.20 – 25.07)                                                    | 19.42 (19.30 – 19.55)                                                   |
| 1998        | 25.42 (25.88 – 25.56)                                                    | 20.05 (19.93 – 20.18)                                                   |
| 1999        | 24.57 (24.44 – 24.71)                                                    | 19.51 (19.39 – 19.64)                                                   |
| 2000        | 24.77 (24.63 – 24.91)                                                    | 19.73 (19.61 – 19.86)                                                   |
| 2001        | 26.22 (26.08 – 26.36)                                                    | 20.75 (20.63 – 20.88)                                                   |
| 2002        | 28.22 (28.07 – 28.37)                                                    | 22.22 (22.10 – 22.36)                                                   |
| 2003        | 30.81 (30.65 – 30.96)                                                    | 24.28 (24.15 – 24.42)                                                   |
| 2004        | 33.51 (33.35 – 33.67)                                                    | 27.00 (26.86 – 27.14)                                                   |
| 2005        | 32.98 (32.82 – 33.14)                                                    | 24.56 (24.42 – 24.70)                                                   |
| 2006        | 32.55 (32.39 – 32.70)                                                    | 24.14 (24.00 – 24.27)                                                   |
| 2007        | 33.48 (33.32 – 33.64)                                                    | 25.52 (25.38 – 25.66)                                                   |
| 2008        | 35.59 (35.43 – 25.76)                                                    | 27.07 (26.92 – 27.21)                                                   |
| 2009        | 36.81 (36.64 – 36.98)                                                    | 28.19 (28.05 – 28.34)                                                   |
| 2010        | 36.40 (36.24 – 36.66)                                                    | 27.53 (27.39 – 27.68)                                                   |
| 2011        | 35.28 (35.12 – 35.44)                                                    | 26.59 (26.45 – 26.74)                                                   |
| 2012        | 35.50 (35.34 – 35.67)                                                    | 26.75 (26.61 – 26.89)                                                   |
| 2013        | 35.45 (35.29 – 35.61)                                                    | 26.34 (26.01 – 26.49)                                                   |
