# Supplementary material for: Trends in the prevalence, incidence and surgical management of carpal tunnel syndrome between 1993 and 2013: an observational analysis of UK primary care records
Source: PubMed Central journal article supplement (PMC6020969; doi:10.1136/bmjopen-2017-020166), 2018-06-19
Supplement: bmjopen-2017-020166supp006.pdf [file bmjopen-2017-020166supp006.pdf]

Suppl. Table 2. Demographics of the crude prevalent population presenting with CTS in each calendar year

| Year        | Female median age                  | Male median age                    |
|-------------|------------------------------------|------------------------------------|
|             | (25% - 75%<br>Interquartile range) | (25% - 75%<br>Interquartile range) |
| <b>1993</b> | 49 (38 – 62)                       | 53 (42 – 66)                       |
| <b>1994</b> | 49 (39 – 62)                       | 53 (42 – 66)                       |
| <b>1995</b> | 50 (39 – 62)                       | 52 (41 – 64)                       |
| <b>1996</b> | 50 (40 – 62)                       | 53 (41 – 66)                       |
| <b>1997</b> | 51 (40 – 62)                       | 53 (42 – 67)                       |
| <b>1998</b> | 51 (40 – 62)                       | 54 (43 – 67)                       |
| <b>1999</b> | 51 (40 – 62)                       | 54 (44 – 66)                       |
| <b>2000</b> | 52 (41 – 64)                       | 55 (44 – 67)                       |
| <b>2001</b> | 53 (42 – 65)                       | 55 (44 – 68)                       |
| <b>2002</b> | 53 (41 – 64)                       | 55 (44 – 67)                       |
| <b>2003</b> | 54 (42 – 65)                       | 55 (44 – 68)                       |
| <b>2004</b> | 55 (43 – 65)                       | 56 (45 – 68)                       |
| <b>2005</b> | 54 (43 – 65)                       | 58 (45 – 70)                       |
| <b>2006</b> | 54 (43 – 66)                       | 58 (45 – 70)                       |
| <b>2007</b> | 54 (42 – 66)                       | 54 (42 – 66)                       |
| <b>2008</b> | 54 (43 – 66)                       | 58 (46 – 70)                       |
| <b>2009</b> | 54 (43 – 67)                       | 58 (47 – 70)                       |
| <b>2010</b> | 54 (43 – 67)                       | 57 (46 – 71)                       |
| <b>2011</b> | 54 (43 – 67)                       | 58 (47 – 71)                       |
| <b>2012</b> | 54 (43 – 67)                       | 59 (48 – 71)                       |
