# Supplementary material for: Trends in the prevalence, incidence and surgical management of carpal tunnel syndrome between 1993 and 2013: an observational analysis of UK primary care records
Source: PubMed Central journal article supplement (PMC6020969; doi:10.1136/bmjopen-2017-020166), 2018-06-19
Supplement: bmjopen-2017-020166supp007.pdf [file bmjopen-2017-020166supp007.pdf]

Suppl. Table 3. Demographics of the crude incident population presenting with CTS in each calendar year

| <b>Year</b> | <b>Female median age<br/>(25% - 75%<br/>Interquartile range)</b> | <b>Male median age<br/>(25% - 75%<br/>Interquartile range)</b> |
|-------------|------------------------------------------------------------------|----------------------------------------------------------------|
| 1993        | 50 (39 – 63)                                                     | 51 (42 – 65)                                                   |
| 1994        | 50 (40 – 63)                                                     | 53 (43 – 66)                                                   |
| 1995        | 51 (40 – 63)                                                     | 53 (42 – 64)                                                   |
| 1996        | 51 (40 – 64)                                                     | 52 (41 – 65)                                                   |
| 1997        | 51 (40 – 64)                                                     | 55 (45 – 67)                                                   |
| 1998        | 51 (40 – 63)                                                     | 54 (44 – 68)                                                   |
| 1999        | 52 (41 – 64)                                                     | 55 (45 – 67)                                                   |
| 2000        | 53 (42 – 65)                                                     | 55 (44 – 68)                                                   |
| 2001        | 53 (42 – 66)                                                     | 55 (45 – 68)                                                   |
| 2002        | 54 (42 – 66)                                                     | 55 (44 – 67)                                                   |
| 2003        | 55 (43 – 66)                                                     | 56 (45 – 68)                                                   |
| 2004        | 55 (44 – 66)                                                     | 57 (45 – 68)                                                   |
| 2005        | 55 (43 – 66)                                                     | 58 (46 – 70)                                                   |
| 2006        | 55 (44 – 67)                                                     | 58 (46 – 70)                                                   |
| 2007        | 54 (43 – 66)                                                     | 58 (47 – 70)                                                   |
| 2008        | 55 (44 – 67)                                                     | 58 (47 – 70)                                                   |
| 2009        | 55 (44 – 67)                                                     | 59 (47 – 71)                                                   |
