# Supplementary material for: Trends in the prevalence, incidence and surgical management of carpal tunnel syndrome between 1993 and 2013: an observational analysis of UK primary care records
Source: PubMed Central journal article supplement (PMC6020969; doi:10.1136/bmjopen-2017-020166), 2018-06-19
Supplement: bmjopen-2017-020166supp008.pdf [file bmjopen-2017-020166supp008.pdf]

Suppl. Table 4 The crude prevalence of CTS by age and gender

| Prevalence by age and gender | 1993      | 1994      | 1995      | 1996      | 1997      | 1998      | 1999      | 2000      | 2001      | 2002      | 2003      | 2004      | 2005      | 2006      | 2007      | 2008      | 2009      | 2010      | 2011      | 2012      | 2013      |
|------------------------------|-----------|-----------|-----------|-----------|-----------|-----------|-----------|-----------|-----------|-----------|-----------|-----------|-----------|-----------|-----------|-----------|-----------|-----------|-----------|-----------|-----------|
| Female 18-29                 | 14.6<br>6 | 15.2<br>2 | 16.7<br>2 | 14.6<br>0 | 13.9<br>7 | 13.7<br>4 | 11.9<br>8 | 10.7<br>1 | 9.78      | 11.8<br>7 | 13.4<br>4 | 13.2<br>3 | 13.2<br>8 | 13.0<br>2 | 13.4<br>6 | 13.4<br>9 | 15.5<br>4 | 14.8<br>4 | 14.3<br>0 | 14.4<br>8 | 13.7<br>9 |
| Female 30-39                 | 42.2<br>1 | 36.8<br>7 | 37.3<br>7 | 36.0<br>4 | 33.5<br>7 | 36.3<br>4 | 34.2<br>0 | 31.9<br>4 | 32.5<br>5 | 36.5<br>7 | 38.2<br>1 | 38.9<br>7 | 39.6<br>7 | 39.3<br>4 | 41.9<br>8 | 42.9<br>9 | 45.1<br>5 | 44.3<br>4 | 41.8<br>7 | 41.2<br>4 | 38.7<br>8 |
| Female 40-49                 | 50.0<br>8 | 53.4<br>6 | 44.7<br>5 | 49.9<br>5 | 46.0<br>4 | 49.2<br>5 | 43.9<br>1 | 43.8<br>8 | 43.5<br>7 | 46.2<br>2 | 47.2<br>3 | 49.5<br>1 | 48.6<br>6 | 47.8<br>0 | 52.3<br>7 | 55.6<br>7 | 54.9<br>0 | 54.8<br>4 | 53.8<br>7 | 56.7<br>1 | 53.9<br>4 |
| Female 50-59                 | 59.4<br>6 | 56.0<br>2 | 57.7<br>1 | 56.7<br>8 | 55.4<br>6 | 56.2<br>3 | 57.8<br>7 | 54.9<br>4 | 58.4<br>0 | 61.4<br>1 | 71.3<br>9 | 78.4<br>1 | 76.7<br>1 | 73.2<br>9 | 70.7<br>7 | 73.8<br>7 | 75.4<br>4 | 73.4<br>6 | 70.4<br>8 | 67.6<br>7 | 70.6<br>0 |
| Female 60-69                 | 31.2<br>6 | 36.0<br>3 | 32.4<br>7 | 32.6<br>0 | 28.0<br>6 | 33.3<br>4 | 31.9<br>1 | 33.9<br>2 | 37.7<br>1 | 40.1<br>0 | 47.6<br>4 | 56.9<br>2 | 52.1<br>6 | 50.2<br>3 | 48.6<br>1 | 56.2<br>1 | 55.1<br>9 | 54.0<br>1 | 50.2<br>1 | 48.9<br>2 | 50.4<br>8 |
| Female 70+                   | 33.1<br>3 | 31.2<br>8 | 33.5<br>3 | 32.6<br>5 | 32.4<br>4 | 31.4<br>0 | 31.7<br>6 | 34.1<br>3 | 37.5<br>2 | 39.9<br>2 | 44.9<br>7 | 49.0<br>8 | 49.7<br>3 | 53.2<br>8 | 52.8<br>5 | 55.8<br>5 | 61.0<br>6 | 59.9<br>6 | 59.4<br>7 | 58.2<br>5 | 58.0<br>5 |
| Male 18-29                   | 5.04      | 4.00      | 3.93      | 4.00      | 3.55      | 2.78      | 2.88      | 2.42      | 2.74      | 2.80      | 3.22      | 3.69      | 3.34      | 3.31      | 3.95      | 3.70      | 3.41      | 3.76      | 4.36      | 4.21      | 4.12      |
| Male 30-39                   | 9.95      | 11.0<br>2 | 11.3<br>6 | 11.1<br>9 | 11.1<br>1 | 10.6<br>0 | 8.61      | 10.3<br>2 | 10.7<br>8 | 11.7<br>5 | 12.0<br>0 | 13.0<br>6 | 12.2<br>3 | 11.5<br>7 | 11.3<br>0 | 11.7<br>8 | 12.1<br>7 | 12.9<br>4 | 11.6<br>7 | 12.2<br>9 | 12.5<br>5 |
| Male 40-49                   | 15.8<br>5 | 17.5<br>9 | 17.6<br>5 | 15.3<br>0 | 16.0<br>0 | 16.3<br>3 | 16.7<br>3 | 16.8<br>1 | 17.7<br>1 | 20.1<br>5 | 20.1<br>8 | 22.0<br>4 | 20.0<br>2 | 18.4<br>5 | 21.0<br>6 | 23.1<br>4 | 22.9<br>3 | 24.8<br>7 | 23.0<br>6 | 23.2<br>1 | 22.5<br>8 |
| Male 50-59                   | 18.7<br>2 | 21.6<br>6 | 21.0<br>8 | 20.2<br>3 | 20.3<br>6 | 19.0<br>3 | 19.5<br>1 | 19.6<br>4 | 22.1<br>2 | 24.4<br>6 | 25.7<br>1 | 26.6<br>8 | 26.5<br>5 | 26.6<br>2 | 28.0<br>9 | 29.9<br>0 | 31.0<br>6 | 30.8<br>6 | 31.1<br>6 | 28.6<br>4 | 32.0<br>1 |
| Male 60-69                   | 17.6<br>4 | 19.9<br>2 | 16.2<br>2 | 16.7<br>8 | 15.6<br>8 | 17.6<br>2 | 19.2<br>7 | 19.9<br>9 | 22.9<br>1 | 23.9<br>3 | 24.6<br>1 | 29.0<br>8 | 28.7<br>1 | 28.8<br>7 | 30.7<br>3 | 31.5<br>9 | 34.8<br>1 | 31.4<br>1 | 31.7<br>1 | 34.8<br>4 | 34.7<br>5 |
| Male 70+                     | 20.9<br>5 | 24.1<br>2 | 22.1<br>6 | 21.6<br>9 | 23.7<br>1 | 23.6<br>5 | 22.1<br>1 | 25.8<br>6 | 27.9<br>3 | 28.4<br>3 | 31.6<br>5 | 34.5<br>1 | 37.9<br>1 | 37.7<br>6 | 39.1<br>6 | 43.1<br>9 | 44.9<br>3 | 45.6<br>0 | 46.3<br>3 | 46.0<br>5 | 49.1<br>4 |
