# Supplementary material for: Trends in the prevalence, incidence and surgical management of carpal tunnel syndrome between 1993 and 2013: an observational analysis of UK primary care records
Source: PubMed Central journal article supplement (PMC6020969; doi:10.1136/bmjopen-2017-020166), 2018-06-19
Supplement: bmjopen-2017-020166supp009.pdf [file bmjopen-2017-020166supp009.pdf]

Suppl. Table 5 The crude incidence of CTS by age and gender

| Incidence by age and gender | 1993  | 1994  | 1995  | 1996  | 1997  | 1998  | 1999  | 2000  | 2001  | 2002  | 2003  | 2004  | 2005  | 2006  | 2007  | 2008  | 2009  | 2010  | 2011  | 2012  | 2013  |
|-----------------------------|-------|-------|-------|-------|-------|-------|-------|-------|-------|-------|-------|-------|-------|-------|-------|-------|-------|-------|-------|-------|-------|
| Female 18-29                | 12.69 | 12.69 | 12.84 | 12.88 | 11.45 | 12.32 | 11.77 | 10.14 | 8.63  | 10.23 | 11.54 | 12.26 | 10.70 | 10.48 | 11.61 | 9.96  | 13.90 | 12.19 | 11.55 | 11.89 | 10.68 |
| Female 30-39                | 31.40 | 28.58 | 28.00 | 27.62 | 28.09 | 30.09 | 27.83 | 25.88 | 27.18 | 28.31 | 30.31 | 33.31 | 30.53 | 30.06 | 32.17 | 33.13 | 34.97 | 33.96 | 32.51 | 31.72 | 28.69 |
| Female 40-49                | 38.43 | 37.75 | 33.08 | 36.31 | 35.17 | 37.42 | 31.74 | 34.72 | 34.05 | 34.94 | 35.63 | 37.37 | 36.27 | 35.62 | 40.06 | 42.51 | 40.89 | 40.86 | 40.05 | 42.06 | 39.50 |
| Female 50-59                | 39.86 | 41.02 | 41.93 | 40.82 | 41.44 | 43.24 | 44.70 | 42.33 | 43.94 | 46.44 | 54.52 | 61.11 | 54.56 | 52.25 | 58.55 | 54.70 | 56.14 | 54.10 | 51.62 | 50.07 | 50.97 |
| Female 60-69                | 25.54 | 29.79 | 24.64 | 25.70 | 25.08 | 26.41 | 26.43 | 26.86 | 30.23 | 32.54 | 39.12 | 46.20 | 38.44 | 36.30 | 31.00 | 42.47 | 42.24 | 41.87 | 37.74 | 35.80 | 37.32 |
| Female 70+                  | 24.45 | 22.29 | 24.21 | 25.28 | 26.17 | 25.09 | 25.25 | 27.67 | 29.29 | 32.87 | 34.96 | 39.57 | 37.78 | 39.60 | 39.13 | 41.89 | 46.03 | 44.89 | 44.46 | 42.29 | 43.53 |
| Male 18-29                  | 3.58  | 3.69  | 3.09  | 3.02  | 2.32  | 2.29  | 2.35  | 1.44  | 2.24  | 2.75  | 2.60  | 3.14  | 2.60  | 2.58  | 3.33  | 3.13  | 2.77  | 3.00  | 3.56  | 3.51  | 3.35  |
| Male 30-39                  | 9.09  | 8.63  | 8.63  | 10.67 | 7.82  | 8.45  | 5.92  | 8.74  | 8.60  | 10.01 | 10.72 | 11.28 | 9.76  | 8.80  | 9.53  | 9.16  | 9.90  | 10.30 | 9.19  | 9.67  | 9.72  |
| Male 40-49                  | 14.23 | 14.35 | 12.63 | 11.83 | 11.86 | 12.41 | 13.43 | 13.26 | 14.39 | 16.32 | 16.08 | 17.78 | 14.28 | 14.25 | 16.36 | 18.23 | 17.76 | 19.58 | 17.15 | 18.13 | 17.63 |
| Male 50-59                  | 13.90 | 17.40 | 17.11 | 15.36 | 16.26 | 15.17 | 16.54 | 15.87 | 18.00 | 18.59 | 19.87 | 21.36 | 20.23 | 20.02 | 22.30 | 23.69 | 23.38 | 23.91 | 23.51 | 24.40 | 25.45 |
| Male 60-69                  | 13.62 | 15.14 | 11.42 | 12.22 | 13.02 | 13.48 | 15.58 | 15.96 | 18.78 | 18.49 | 19.80 | 23.71 | 21.12 | 21.81 | 23.95 | 24.79 | 27.56 | 23.24 | 24.59 | 27.90 | 26.23 |

|          |       |      |      |      |      |      |      |      |      |      |      |      |      |      |      |      |      |      |      |      |      |
|----------|-------|------|------|------|------|------|------|------|------|------|------|------|------|------|------|------|------|------|------|------|------|
| Male 70+ | 14.88 | 18.3 | 15.7 | 16.6 | 18.3 | 18.0 | 17.2 | 19.2 | 20.5 | 21.9 | 24.7 | 27.2 | 27.9 | 26.9 | 29.6 | 31.8 | 33.8 | 32.5 | 33.2 | 33.7 | 33.8 |
|          |       | 8    | 2    | 4    | 4    | 6    | 9    | 7    | 3    | 5    | 1    | 4    | 2    | 4    | 7    | 4    | 1    | 2    | 3    | 8    | 3    |
