# Supplementary material for: Trends in the prevalence, incidence and surgical management of carpal tunnel syndrome between 1993 and 2013: an observational analysis of UK primary care records
Source: PubMed Central journal article supplement (PMC6020969; doi:10.1136/bmjopen-2017-020166), 2018-06-19
Supplement: bmjopen-2017-020166supp010.pdf [file bmjopen-2017-020166supp010.pdf]

Suppl. Table 6 Comparison of population studies reporting the prevalence and / or incidence of carpal tunnel syndrome

| <b>Study Identifier</b>              | <b>Study method</b>                                                                                                                                                                                                                                                                                                                                                | <b>Definition of CTS</b>                                                                                                                                                                                                                                                      | <b>Comments</b>                                                                                                                     |
|--------------------------------------|--------------------------------------------------------------------------------------------------------------------------------------------------------------------------------------------------------------------------------------------------------------------------------------------------------------------------------------------------------------------|-------------------------------------------------------------------------------------------------------------------------------------------------------------------------------------------------------------------------------------------------------------------------------|-------------------------------------------------------------------------------------------------------------------------------------|
| De Krom et al. 1992                  | Survey of a random age sex stratified sample of the general population taken from the population register of Maastricht between 1983 and 1985                                                                                                                                                                                                                      | Questionnaire based on symptoms and signs                                                                                                                                                                                                                                     | [1]                                                                                                                                 |
| Ferry et al. 1998                    | <p>i) Cross sectional survey to estimate the point prevalence of hand symptoms (from a random sample of 1000 individuals from the UK general population, aged 18 to 75 years) and</p> <p>ii) nerve conduction testing of a weighted sample</p> <ul style="list-style-type: none"> <li>- Circa. 1998 (not stated)</li> <li>- point prevalence determined</li> </ul> | Based on nerve conduction studies using defined cut offs                                                                                                                                                                                                                      | Subjects over 54yrs had a higher prevalence than younger participants. No difference between genders was noted.[2]                  |
| Nordstrom et al. 1998                | Prospective study conducted in the general population of the Marshfield Epidemiologic Study Area, Wisconsin, between 1991 and 1993                                                                                                                                                                                                                                 | <ol style="list-style-type: none"> <li>1. any diagnosis of possible, probable or definite CTS;</li> <li>2. any diagnosis of probable or definite CTS; and</li> <li>3. any diagnosis of possible , probable or definite CTS plus at least one of six clinical signs</li> </ol> | A 3.5 fold increase in CTS incidence was noted compared with data from 20 years previously in the same study population[3]          |
| Atroshi et al. 2000                  | Survey of a random sample of the age sex stratified general population of Southern Sweden, in 1997                                                                                                                                                                                                                                                                 | Diagnosis based on clinical examination and positive electrophysiological findings                                                                                                                                                                                            | The population prevalence of symptoms was 14.4%; the prevalence of clinically and electrophysiologically confirmed CTS was 2.7% [4] |
| Papanicolaou, McCable & Firrell 2001 | Cross-sectional study to evaluate prevalence of carpal tunnel syndrome in the General population of the United States                                                                                                                                                                                                                                              | Katz hand diagram                                                                                                                                                                                                                                                             | After correcting for nonresponders the lowest possible estimate of CTS was 3.72% [5]                                                |

|                                    |                                                                                                                                                                                                |                                                                                                                                                                          |                                                                                                                                                                                                                             |
|------------------------------------|------------------------------------------------------------------------------------------------------------------------------------------------------------------------------------------------|--------------------------------------------------------------------------------------------------------------------------------------------------------------------------|-----------------------------------------------------------------------------------------------------------------------------------------------------------------------------------------------------------------------------|
| Mondelli, Giannini & Giacchi 2002  | Prospective study of patients referred to four electrodiagnostic laboratories in the Siena area, Italy. Mean annual incidence calculated from time period 1991 to 1998                         | Diagnosis based on clinical history and electrodiagnostic evidence of a reduced distal conduction velocity of the median nerve (American Academy of Neurology standards) | Of the patients presenting 79.7% were women. The mean age at diagnosis was 55.0 +/- 14.4 years (range 16 to 97) [6]                                                                                                         |
| Bland, Rudolfer 2003               | Prospective collection of neurophysiological and clinical data of patients referred to two electromyography clinics in the UK between 1991 to 1993 and 1992 to 2001                            | Based on nerve conduction studies using defined cut offs                                                                                                                 | An increase in diagnosed cases was observed between the two data collection periods; attributed to referral of milder cases. Median nerve impairment was more severe in the elderly and men at all ages. [7]                |
| Latinovic, Gulliford & Hughes 2006 | Population study based in a general practice database of consulting primary care patients from 253 practices between January 1992 and 31 December 2000.                                        | Read and Oxmis codes for carpal tunnel syndrome                                                                                                                          | Most frequent in women aged 45-54. In 2000 operative treatment was undertaken for 31% of incident CTS presentations [8]                                                                                                     |
| Bonger et al. 2007                 | Analysis of the first and second Dutch National Survey of General Practice, conducted in 1987 and 2001                                                                                         | (International Classification of Primary Care) ICPC coded diagnosis                                                                                                      | A crude increase in incidence over time was not statistically significant after subdividing by age and sex. Incidence rates were related to the job level in women, but not men [9]                                         |
| Dieleman et al. 2008               | Population study based in a general practice database (Integrated Primary Care Information (IPCI) database): data of consulting primary care patients in the Netherlands between 1996 and 2003 | ICPC coded diagnosis                                                                                                                                                     | Neuropathic pain was noted to affect almost 1% of the population. Mononeuropathies and carpal tunnel syndrome were the most common causes [10]                                                                              |
| Gelfman et al. 2009                | Analysis of medical records linkage system 1981-1985 to 2000-2005 of residents of Olmsted County, Minnesota (Rochester Epidemiology Project)                                                   | Clinical coding with a sample verified by full record review                                                                                                             | An increase in incidence was observed over the study period. An increase in young individuals seeking care for less severe CTS in the mid-1980's was followed in the 1990's by an increasing incidence in older people [11] |

|                      |                                                                                                                                                             |                                                                                                                                                                         |                                                                                                                                                                                                                                                                                                                                                   |
|----------------------|-------------------------------------------------------------------------------------------------------------------------------------------------------------|-------------------------------------------------------------------------------------------------------------------------------------------------------------------------|---------------------------------------------------------------------------------------------------------------------------------------------------------------------------------------------------------------------------------------------------------------------------------------------------------------------------------------------------|
| Atroshi et al. 2011  | Analysis of the Skane Health Care Register (SCHR) (inhabitants presenting to public health providers), incident cases identified between 2006 - 2008        | Physician diagnosed                                                                                                                                                     | [12]                                                                                                                                                                                                                                                                                                                                              |
| Jenkins et al. 2012b | Prospective audit of patients referred to a regional hand service based in secondary care in Scotland between November 2004 and May 2010                    | Symptoms of pain or paraesthesia in the median nerve distribution and one or more of: nerve conduction deficit, thenar muscle wasting or positive Tinel or Phalen signs | Mean age of presentation 55.1 years (range 22 to 96, SD 13.5 years). Mean body mass index at presentation 29.5 kg/m <sup>2</sup><br>CTS more common in: females (OR 1.9, 95% CI 1.5 to 2.5)<br>Incidence varied significantly between deprivation groups: most deprived 81/100,000 and least deprived 62/100,000 (OR 1.3, 95% CI 1.1 to 1.6) [13] |
| Jenkins et al. 2013  | Prospective audit of patients referred to a regional hand service based in secondary care in Scotland between November 2004 and May 2010, who were employed | Clinical diagnosis based on history and examination, in most cases substantiated by nerve conduction studies                                                            | The greatest incidence as in caring and leisure occupations (197 per 100,000) and the lowest incidence was in the associate professional group (37 per 100,000) [14]                                                                                                                                                                              |
| Dale 2013            | Pooled analysis of six prospective studies collecting data from >50 workplaces, over variable time frames                                                   | A pooled case definition was derived to include clinical and electrodiagnostic criteria                                                                                 | 7.8% of 4321 subjects studied had prevalent CTS, with an additional 204 subjects meeting the CTS criteria, leading to an incidence of 2.3 cases per 100 person years [15]                                                                                                                                                                         |

1 de Krom MC, Knipschild PG, Kester AD, et al. Carpal tunnel syndrome: prevalence in the general population. *J Clin Epidemiol* 1992;45:373-6.

2 Ferry S, Pritchard T, Keenan J, et al. Estimating the prevalence of delayed median nerve conduction in the general population. *Br J Rheumatol* 1998;37:630-5.

3 Nordstrom DL, DeStefano F, Vierkant RA, et al. Incidence of diagnosed carpal tunnel syndrome in a general population. *Epidemiology* 1998;9:342-5.

- 4 Atroshi I. Carpal tunnel syndrome--prevalence, electrodiagnosis and outcome instruments. *Acta Orthop Scand* 1999;70:70-1.
- 5 Papanicolaou GD, McCabe SJ, Firrell J. The prevalence and characteristics of nerve compression symptoms in the general population. *Journal of Hand Surgery - American Volume* 2001;26:460-6.
- 6 Mondelli M, Giannini F, Giacchi M. Carpal tunnel syndrome incidence in a general population. *Neurology* 2002;58:289-94.
- 7 Bland JDP, Rudolfer SM. Clinical surveillance of carpal tunnel syndrome in two areas of the United Kingdom, 1991–2001. *Journal of Neurology, Neurosurgery & Psychiatry* 2003;74:1674-9 doi:10.1136/jnnp.74.12.1674.
- 8 Latinovic R, Gulliford MC, Hughes RA. Incidence of common compressive neuropathies in primary care. *J Neurol Neurosurg Psychiatry* 2006;77:263-5 doi:10.1136/jnnp.2005.066696.
- 9 Bongers FJ, Schellevis FG, van den Bosch WJ, et al. Carpal tunnel syndrome in general practice (1987 and 2001): incidence and the role of occupational and non-occupational factors. *Br J Gen Pract* 2007;57:36-9.
- 10 Dieleman JP, Kerklaan J, Huygen FJ, et al. Incidence rates and treatment of neuropathic pain conditions in the general population. *Pain* 2008;137:681-8 doi:10.1016/j.pain.2008.03.002 [doi].
- 11 Gelfman R, Melton LJ, 3rd, Yawn BP, et al. Long-term trends in carpal tunnel syndrome. *Neurology* 2009;72:33-41 doi:10.1212/01.wnl.0000338533.88960.b9; 10.1212/01.wnl.0000338533.88960.b9.
- 12 Atroshi I, Englund M, Turkiewicz A, et al. Incidence of physician-diagnosed carpal tunnel syndrome in the general population. *Arch Intern Med* 2011;171:943-5.
- 13 Jenkins PJ, Watts AC, Duckworth AD, et al. Socioeconomic deprivation and the epidemiology of carpal tunnel syndrome. *Journal of Hand Surgery-European Volume* 2012;37E:123-9 doi:10.1177/1753193411419952.
- 14 Jenkins PJ, Srikantharajah D, Duckworth AD, et al. Carpal tunnel syndrome: the association with occupation at a population level. *Journal of Hand Surgery-European Volume* 2013;38E:67-72 doi:10.1177/1753193412455790.
- 15 Dale AM, Harris-Adamson C, Rempel D, et al. Prevalence and incidence of carpal tunnel syndrome in US working populations: Pooled analysis of six prospective studies. *Scandinavian Journal of Work, Environment and Health* 2013;39:495-505.
