# Supplementary material for: Trends in the prevalence, incidence and surgical management of carpal tunnel syndrome between 1993 and 2013: an observational analysis of UK primary care records
Source: PubMed Central journal article supplement (PMC6020969; doi:10.1136/bmjopen-2017-020166), 2018-06-19
Supplement: bmjopen-2017-020166supp011.pdf [file bmjopen-2017-020166supp011.pdf]

Suppl. Table 7 summary of reported prevalence and incidence by gender

| Study Identifier                        | Country of Origin<br>Data collection<br>(Prevalence or<br>Incidence) | Prevalence or<br>Incidence per<br>100,000, per annum |        |      | Female / male ratio |
|-----------------------------------------|----------------------------------------------------------------------|------------------------------------------------------|--------|------|---------------------|
|                                         |                                                                      | All                                                  | Female | Male |                     |
| De Krom et al. 1992                     | The Netherlands<br>1983 - July 1985<br>(Prevalence)                  | 5700                                                 | 5800   | 600  | 9.66                |
| Atroshi et al. 2000                     | Sweden<br>1997<br>(Prevalence)                                       | 3800                                                 | 4600   | 2800 | 1.64                |
| Papanicolaou,<br>McCable & Firrell 2001 | United States<br>2001<br>(Prevalence)                                | 3720                                                 |        |      | 4.8                 |
| Ferry et al. 1998                       | United Kingdom<br>Not stated<br>(Incidence)                          | 8200                                                 | 6400   | 8200 | 0.78                |
| Nordstrom et al. 1998                   | United States<br>1991 - 1993<br>(Incidence)                          | 346                                                  | 373    | 318  | 1.17                |
| Mondelli, Giannini &<br>Giacchi 2002    | Italy<br>1991 – 1998 (mean)<br>(Incidence)                           | 276                                                  | 506    | 139  | 3.64                |
| Bland, Rudolfer 2003                    | Kent, UK<br>1991 - 2001<br>(Incidence)<br>Huddersfield, UK           | 105                                                  | 120.5  | 60   | 2                   |
|                                         |                                                                      |                                                      | 61.5   | 30   | 2                   |

---

|                                    |                                               |       |       |      |      |
|------------------------------------|-----------------------------------------------|-------|-------|------|------|
| Latinovic, Gulliford & Hughes 2006 | United Kingdom<br>(Incidence)                 |       | 192.8 | 87.8 | 2.23 |
| Bongers et al. 2007                | The Netherlands<br>(Incidence)<br>1987        | 130   | 190   | 60   | 3.17 |
|                                    | 2001                                          | 180   | 280   | 90   | 3.11 |
| Dieleman et al. 2008               | The Netherlands<br>1996 - 2003<br>(Incidence) | 233.1 |       |      |      |
| Gelfman et al. 2009                | United States<br>(Incidence)<br>1981-1985     | 258   | 337   | 177  | 1.90 |
|                                    | 2001-2005                                     | 424   | 542   | 303  | 1.79 |
| Atroshi et al. 2011                | Sweden<br>2006 - 2008<br>(Incidence)          |       | 428   | 182  | 2.35 |
| Jenkins et al. 2012b               | Scotland<br>2004 - 2010<br>(Incidence)        | 72    | 98    | 43   | 2.28 |
| Jenkins et al. 2013                | Scotland<br>2004 - 2010<br>(Incidence)        | 103   |       |      |      |
| Dale 2013                          | United States<br>(Incidence)                  | 2300  |       |      |      |

---
